# Supplementary material for: High-Throughput Identification of Potential Minor Histocompatibility Antigens by MHC Tetramer-Based Screening: Feasibility and Limitations
Source: PubMed Central journal article supplement (PMC3151248; doi:10.1371/journal.pone.0022523), 2011-08-05
Supplement: pone.0022523.s001.pdf [file pone.0022523.s001.pdf]

### a HMHA-1

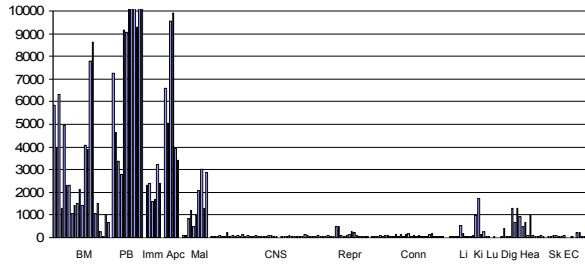

### b PTPRC

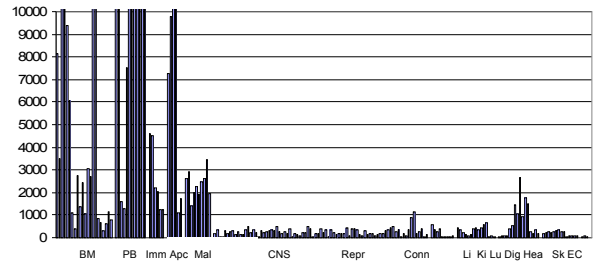

### c KLK2

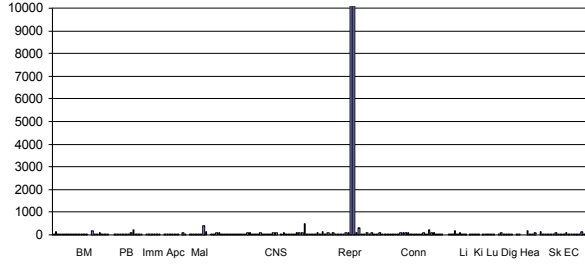

### d GAPD

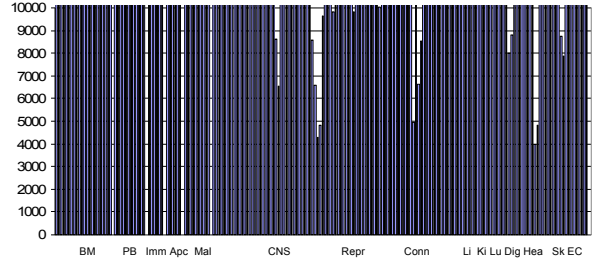

### e ITGB2

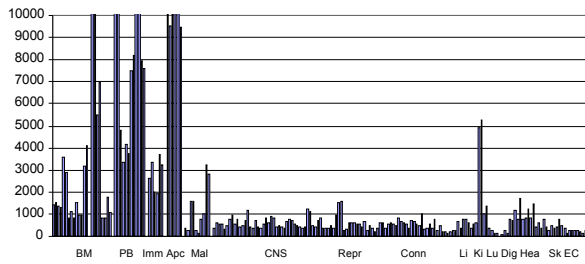

### f FLT3

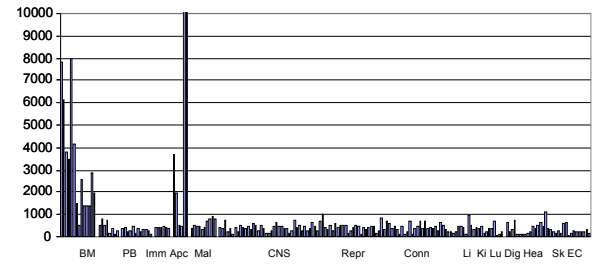

### g Prediction of HMHA-1 epitopes

Gene: HMHA1 RefSeq mRNA seq: NM\_012292.2  
SNP: RH139 dbSNP ID: rs\_1801284

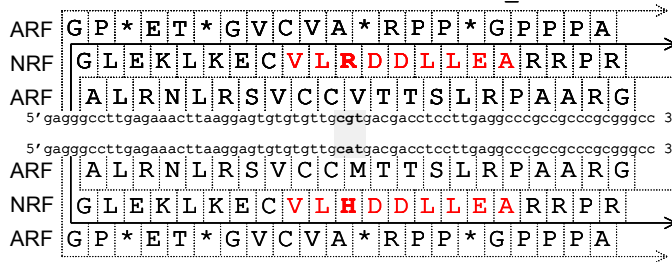

| HMHA1             | S  | B  | N    |
|-------------------|----|----|------|
| V L R D D L L E A | 23 | 6  | 71   |
| V L H D D L L E A | 23 | 80 | 15   |
| S V C C V T T S L | 20 | 2  | 1613 |
| S V C C M T T S L | 20 | 2  | 1450 |

### h Prediction of ITGB2 epitopes

Gene: ITGB2 RefSeq mRNA seq: NM\_000211.3  
SNP: KE630 dbSNP ID: rs\_2230531

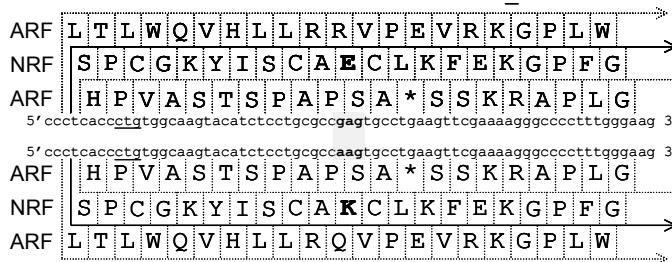

| ITGB2                 | S  | B  | N  |
|-----------------------|----|----|----|
| H L L R R V P E V     | 29 | 20 | 29 |
| H L L R Q V P E V     | 29 | 20 | 31 |
| V H L L R R V P E V   | 20 |    |    |
| V H L L R Q V P E V   | 20 |    |    |
| W Q V H L L R R V     |    | 15 |    |
| W Q V H L L R Q V     |    | 15 |    |
| H L L R Q V P E V R K | *  | *  |    |
| T L W Q V H L L R R V | *  | *  | 70 |
| T L W Q V H L L R Q V | *  | *  | 70 |
