# Supplementary material for: High-Throughput Identification of Potential Minor Histocompatibility Antigens by MHC Tetramer-Based Screening: Feasibility and Limitations
Source: PubMed Central journal article supplement (PMC3151248; doi:10.1371/journal.pone.0022523), 2011-08-05
Supplement: pone.0022523.s002.pdf [file pone.0022523.s002.pdf]

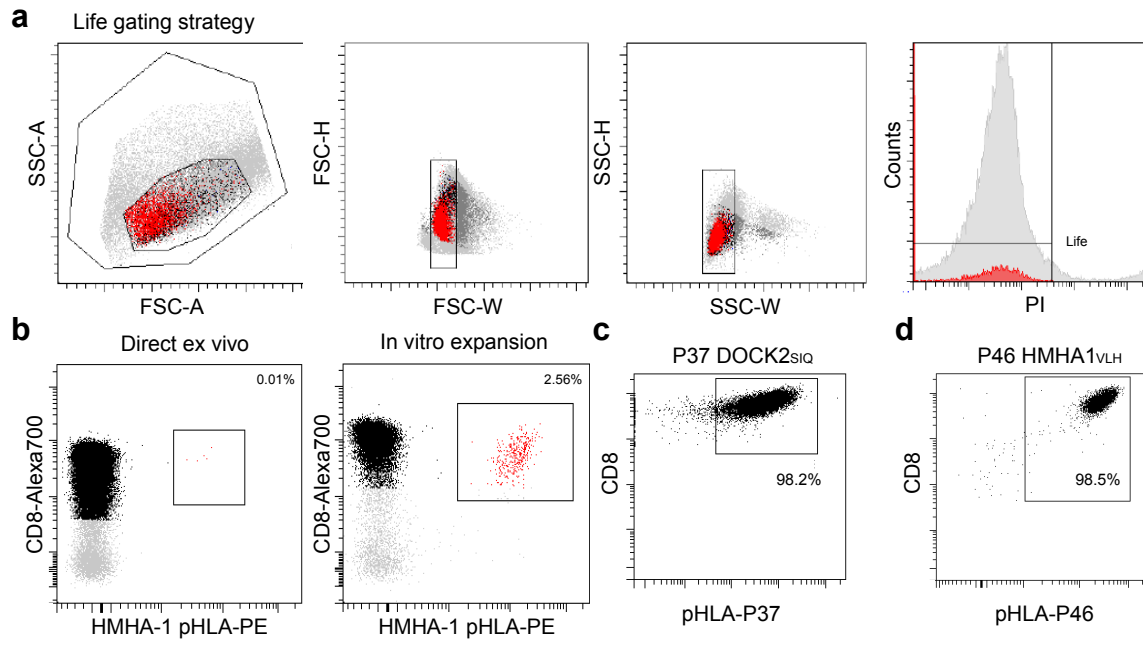

Supplementary Figure 2
