# Supplementary material for: High-Throughput Identification of Potential Minor Histocompatibility Antigens by MHC Tetramer-Based Screening: Feasibility and Limitations
Source: PubMed Central journal article supplement (PMC3151248; doi:10.1371/journal.pone.0022523), 2011-08-05
Supplement: pone.0022523.s003.pdf [file pone.0022523.s003.pdf]

Supplementary Table I. Identified genes with a hematopoiesis-restricted expression pattern

| Gene symbol | Official full name                                                             | mRNA accession | Protein accession |
|-------------|--------------------------------------------------------------------------------|----------------|-------------------|
| AIF1        | Allograft inflammatory factor 1                                                | NM_001623.3    | NP_001614.3       |
| AREG        | Amphiregulin                                                                   | NM_001657.2    | NP_001648.1       |
| ARHGAP4     | Rho GTPase activating protein 4                                                | NM_001164741.1 | NP_001158213.1    |
| ARHGAP15    | Rho GTPase activating protein 15                                               | NM_018460.3    | NP_060930.3       |
| ARHGAP25    | Rho GTPase activating protein 25                                               | NM_001007231.1 | NP_001007232.1    |
| ATP2A3      | Sarcoplasmic/endoplasmic reticulum calcium ATPase 3 isoform a                  | NM_005173.2    | NP_005164.2       |
| BTK         | Bruton agammaglobulinemia tyrosine kinase                                      | NM_000061.2    | NP_000052.1       |
| CBFA2T3     | Protein CBFA2T3 isoform MTG16b                                                 | NM_005187.4    | NP_005178.4       |
| CCL3        | Chemokine (C-C motif) ligand 3                                                 | NM_002983.2    | NP_002974.1       |
| CD37        | CD37 molecule                                                                  | NM_001774.2    | NP_001765.1       |
| CD48        | CD48 molecule                                                                  | NM_001778.2    | NP_001769.2       |
| CD52        | CD52 molecule                                                                  | NM_001803.2    | NP_001794.2       |
| CD69        | CD69 molecule                                                                  | NM_001781.2    | NP_001772.1       |
| CD79b       | CD79b molecule, immunoglobulin-associated beta                                 | NM_000626.2    | NP_000617.1       |
| CD83        | CD83 molecule                                                                  | NM_001040280.1 | NP_001035370.1    |
| CENTB1      | ArfGAP with coiled-coil, ankyrin repeat and PH domains 1                       | NM_014716.3    | NP_055531.1       |
| CGO18       | NEDD4 binding protein 2-like 1                                                 | NM_001079691.1 | NP_001073159.1    |
| CORO1A      | Coronin, actin binding protein, 1A                                             | NM_001193333.2 | NP_001180262.1    |
| CPVL        | Carboxypeptidase, vitellogenic-like                                            | NM_019029.2    | NP_061902.2       |
| CRHBP       | Corticotropin releasing hormone binding protein                                | NM_001882.3    | NP_001873.2       |
| CSF3R       | Colony stimulating factor 3 receptor                                           | NM_000760.3    | NP_000751.1       |
| CXorf9      | SAM and SH3 domain containing 3                                                | NM_018990.3    | NP_061863.1       |
| DOCK2       | Dedicator of cytokinesis 2                                                     | NM_004946.2    | NP_004937.1       |
| DOK2        | Docking protein 2                                                              | NM_003974.2    | NP_003965.2       |
| DUSP22      | Dual specificity phosphatase 22                                                | NM_020185.3    | NP_064570.1       |
| EVI2B       | Ecotropic viral integration site 2B                                            | NM_006495.3    | NP_006486.3       |
| FCER1A      | Fc fragment of IgE, high affinity I, receptor for; alpha polypeptide           | NM_002001.2    | NP_001992.1       |
| FLT3        | Fms-related tyrosine kinase 3                                                  | NM_004119.2    | NP_004110.2       |
| FMNL1       | Formin-like 1                                                                  | NM_005892.3    | NP_005883.2       |
| FNBP1       | Formin binding protein 1                                                       | NM_015033.2    | NP_055848.1       |
| FOSB        | FBJ murine osteosarcoma viral oncogene homolog B                               | NM_001114171.1 | NP_001107643.1    |
| GATA2       | GATA binding protein 2                                                         | NM_001145661.1 | NP_001139133.1    |
| GMFG        | Glia maturation factor, gamma                                                  | NM_004877.2    | NP_004868.1       |
| GNA15       | Guanine nucleotide binding protein, alpha 15                                   | NM_002068.2    | NP_002059.2       |
| HMHA-1      | Histocompatibility minor HA-1                                                  | NM_012292.2    | NP_036424.2       |
| HOXA9       | Homeobox A9                                                                    | NM_152739.3    | NP_689952.1       |
| HSPA6       | Heat shock 70kDa protein 6                                                     | NM_002155.3    | NP_002146.2       |
| ICAM3       | Intercellular adhesion molecule 3                                              | NM_002162.3    | NP_002153.2       |
| IL2RG       | Interleukin 2 receptor, gamma                                                  | NM_000206.2    | NP_000197.1       |
| IQGAP2      | IQ motif containing GTPase activating protein 2                                | NM_006633.2    | NP_006624.2       |
| ISG20       | Interferon stimulated exonuclease gene 20kDa                                   | NM_002201.4    | NP_002192.2       |
| ITGAL       | Integrin, alpha L                                                              | NM_001114380.1 | NP_001107852.1    |
| ITGAM       | Integrin, alpha M                                                              | NM_000632.3    | NP_000623.2       |
| ITGB2       | Integrin, beta 2                                                               | NM_000211.3    | NP_00202.2        |
| KCNAB2      | Voltage-gated potassium channel subunit beta-2 isoform 1                       | NM_003636.2    | NP_003627.1       |
| LAT2        | Linker for activation of T-cells family member 2                               | NM_014146.3    | NP_054865.2       |
| LCP2        | Lymphocyte cytosolic protein 2                                                 | NM_005565.3    | NP_005556.1       |
| LOC81691    | Putative RNA exonuclease NEF-sp isoform 2                                      | NM_001144924.1 | NP_001138396.1    |
| LRMP        | Lymphoid-restricted membrane protein                                           | NM_006152.2    | NP_006143.2       |
| LTB         | Lymphotoxin-beta isoform a                                                     | NM_002341.1    | NP_002332.1       |
| LYN         | Tyrosine-protein kinase Lyn isoform B                                          | NM_001111097.1 | NP_001104567.1    |
| MAP4K1      | Mitogen-activated protein kinase kinase kinase kinase 1 isoform 1              | NM_001042600.1 | NP_001036065.1    |
| MCM5        | DNA replication licensing factor MCM5                                          | NM_006739.3    | NP_006730.2       |
| MPL         | Thrombopoietin receptor precursor                                              | NM_005373.2    | NP_005364.1       |
| NCF4        | Neutrophil cytosol factor 4 isoform 1                                          | NM_000631.4    | NP_000622.2       |
| NUP210      | Nuclear pore membrane glycoprotein 210 precursor                               | NM_024923.2    | NP_079199.2       |
| PIK3CD      | Phosphatidylinositol-4,5-bisphosphate 3-kinase catalytic subunit delta isoform | NM_005026.3    | NP_005017.3       |
| PIM2        | Serine/threonine-protein kinase pim-2                                          | NM_006875.3    | NP_006866.2       |
| PLCB2       | 1-Phosphatidylinositol-4,5-bisphosphate phosphodiesterase beta-2               | NM_004573.2    | NP_004564.2       |
| PLEK        | Pleckstrin                                                                     | NM_002664.2    | NP_002655.2       |
| PRKCB1      | Protein kinase C beta type isoform 2                                           | NM_002738.6    | NP_002729.2       |
| PSD4        | PH and SEC7 domain-containing protein 4                                        | NM_012455.2    | NP_036587.2       |
| PSMB10      | Proteasome subunit beta type-10 proprotein                                     | NM_002801.2    | NP_002792.1       |
| PSMB8       | Proteasome subunit beta type-8 isoform E1 proprotein                           | NM_004159.4    | NP_004150.1       |
| PTPN22      | Tyrosine-protein phosphatase non-receptor type 22 isoform 3                    | NM_001193431.1 | NP_001180360.1    |
| PTPN6       | Tyrosine-protein phosphatase non-receptor type 6 isoform 1                     | NM_002831.5    | NP_002822.2       |
| PTPRC       | Receptor-type tyrosine-protein phosphatase C isoform 1 precursor               | NM_002838.3    | NP_002829.2       |
| PTPRCAP     | Protein tyrosine phosphatase receptor type C-associated protein                | NM_005608.2    | NP_005599.1       |
| RASGRP2     | RAS guanyl-releasing protein 2                                                 | NM_153819.1    | NP_722541.1       |
| RGS1        | Regulator of G-protein signaling 1                                             | NM_002922.3    | NP_002913.3       |
| SELL        | L-selectin precursor                                                           | NM_000655.4    | NP_000646.2       |
| SELPLG      | P-selectin glycoprotein ligand 1                                               | NM_003006.3    | NP_002997.1       |
| SEPT6       | Septin-6 isoform B                                                             | NM_015129.5    | NP_055944.2       |
| SF1         | Splicing factor 1 isoform 6                                                    | NM_001178030.1 | NP_001171501.1    |
| SOCS2       | Suppressor of cytokine signaling 2                                             | NM_003877.3    | NP_003868.1       |
| SP110       | Sp110 nuclear body protein isoform d                                           | NM_001185015.1 | NP_001171944.1    |
| SYNGR1      | Synaptogyrin-1 isoform 1a                                                      | NM_004711.4    | NP_004702.2       |
| TNRC5       | Protein canopy homolog 3 precursor                                             | NM_006586.3    | NP_006577.2       |
| ZFP36L2     | Zinc finger protein 36, C3H1 type-like 2                                       | NM_006887.4    | NP_008818.3       |
