# Supplementary material for: High-Throughput Identification of Potential Minor Histocompatibility Antigens by MHC Tetramer-Based Screening: Feasibility and Limitations
Source: PubMed Central journal article supplement (PMC3151248; doi:10.1371/journal.pone.0022523), 2011-08-05
Supplement: pone.0022523.s004.pdf [file pone.0022523.s004.pdf]

Supplementary Table II. Total MiHA epitopes predicted by HLA-peptide binding algorithm

| Gene symbol | Residue Change | RefSNP accession | dbSNP AH <sup>a</sup> | Minor Frequency <sup>#</sup> | Reading Frame | Length | Peptide Sequence <sup>7</sup> |
|-------------|----------------|------------------|-----------------------|------------------------------|---------------|--------|-------------------------------|
| AIF         | RG 14          | rs2736182        | 0,22                  | 0,01                         | NRF           | 10     | DLQGGKAFGL                    |
| AIF         | RG 14          | rs2736182        | 0,22                  | 0,01                         | NRF           | 10     | DLQGGKAFRL                    |
| AIF         | RG 14          | rs2736182        | 0,22                  | 0,01                         | NRF           | 11     | GLLKAQQEERL                   |
| AIF         | RG 14          | rs2736182        | 0,22                  | 0,01                         | NRF           | 9      | LQGGKAFGL                     |
| AIF         | RG 14          | rs2736182        | 0,22                  | 0,01                         | NRF           | 9      | LQGGKAFRL                     |
| AIF         | RG 14          | rs2736182        | 0,22                  | 0,01                         | NRF           | 11     | RLKKAQQEERL                   |
| AREG        | PP 10          | rs1615111        | 0,18                  | 0,02                         | ARF           | 9      | AGAGGAVAL                     |
| AREG        | PP 10          | rs1615111        | 0,18                  | 0,02                         | ARF           | 9      | AGASGAVAL                     |
| AREG        | PP 10          | rs1615111        | 0,18                  | 0,02                         | ARF           | 9      | ATAGAGGAV                     |
| AREG        | PP 10          | rs1615111        | 0,18                  | 0,02                         | ARF           | 9      | ATAGASGAV                     |
| AREG        | PP 10          | rs1615111        | 0,18                  | 0,02                         | ARF           | 11     | ATAGASGAVAL                   |
| AREG        | PT 76          | rs7656521        | 0,09                  | 0,01                         | NRF           | 10     | AAHPPLHSL                     |
| AREG        | PT 76          | rs7656521        | 0,09                  | 0,01                         | NRF           | 10     | AAHTPGLHSL                    |
| AREG        | PT 76          | rs7656521        | 0,09                  | 0,01                         | NRF           | 9      | AHPPLHSL                      |
| AREG        | PT 76          | rs7656521        | 0,09                  | 0,01                         | NRF           | 9      | AHTPGLHSL                     |
| AREG        | FF 177         | rs2291715        | 0,22                  | N.D.                         | ARF           | 9      | ILVNGVGKS                     |
| AREG        | FF 177         | rs2291715        | 0,22                  | N.D.                         | ARF           | 11     | NVSKNILVNGV                   |
| AREG        | FF 177         | rs2291715        | 0,22                  | N.D.                         | ARF           | 11     | NVSKNISVNGV                   |
| AREG        | FF 177         | rs2291715        | 0,22                  | N.D.                         | ARF           | 9      | SKNILVNGV                     |
| AREG        | FF 177         | rs2291715        | 0,22                  | N.D.                         | ARF           | 9      | SKNISVNGV                     |
| ARHGAP4     | VA 104         | rs5987182        | 0,14                  | 0,00                         | NRF           | 9      | LLSPLHCWA                     |
| ARHGAP4     | VA 104         | rs5987182        | 0,14                  | 0,00                         | NRF           | 10     | LLSPLHCWAV                    |
| ARHGAP4     | VA 104         | rs5987182        | 0,14                  | 0,00                         | NRF           | 11     | LLSPLHCWAVL                   |
| ARHGAP4     | VA 104         | rs5987182        | 0,14                  | 0,00                         | NRF           | 9      | LLSPLHCWV                     |
| ARHGAP4     | VA 104         | rs5987182        | 0,14                  | 0,00                         | NRF           | 10     | LLSPLHCWVV                    |
| ARHGAP4     | VA 104         | rs5987182        | 0,14                  | 0,00                         | NRF           | 11     | LLSPLHCWVVL                   |
| ARHGAP4     | VA 104         | rs5987182        | 0,14                  | 0,00                         | NRF           | 9      | LSPLHCWAV                     |
| ARHGAP4     | VA 104         | rs5987182        | 0,14                  | 0,00                         | NRF           | 9      | PLHCWAVLL                     |
| ARHGAP4     | VA 104         | rs5987182        | 0,14                  | 0,00                         | NRF           | 9      | PLHCWVLL                      |
| ARHGAP4     | VA 104         | rs5987182        | 0,14                  | 0,00                         | NRF           | 10     | SLLSPLHCWA                    |
| ARHGAP4     | VA 104         | rs5987182        | 0,14                  | 0,00                         | NRF           | 11     | SLLSPLHCWAV                   |
| ARHGAP4     | VA 104         | rs5987182        | 0,14                  | 0,00                         | NRF           | 10     | SLLSPLHCWV                    |
| ARHGAP4     | VA 104         | rs5987182        | 0,14                  | 0,00                         | NRF           | 11     | SLLSPLHCWVV                   |
| ARHGAP4     | VA 104         | rs5987182        | 0,14                  | 0,00                         | NRF           | 10     | SPLHCWVLL                     |
| ARHGAP4     | VV 523         | rs2070098        | N.D.                  | 0,00                         | ARF           | 9      | ACAPGGEL                      |
| ARHGAP4     | VV 523         | rs2070098        | N.D.                  | 0,00                         | ARF           | 9      | ACAPGRGEL                     |
| ARHGAP4     | VV 523         | rs2070098        | N.D.                  | 0,00                         | ARF           | 10     | APGGELHSL                     |
| ARHGAP4     | VV 523         | rs2070098        | N.D.                  | 0,00                         | ARF           | 10     | APRGELHSL                     |
| ARHGAP4     | VV 523         | rs2070098        | N.D.                  | 0,00                         | ARF           | 10     | SLCPWSWRAA                    |
| ARHGAP4     | VV 523         | rs2070098        | N.D.                  | 0,00                         | ARF           | 10     | SLCPWVWRAA                    |
| ARHGAP15    | LF 438         | rs11538443       | N.D.                  | 0,00                         | NRF           | 11     | FLRAENETGNM                   |
| ARHGAP15    | LF 438         | rs11538443       | N.D.                  | 0,00                         | NRF           | 9      | GIVFGPTFL                     |
| ARHGAP15    | LF 438         | rs11538443       | N.D.                  | 0,00                         | NRF           | 9      | GIVFGPTLL                     |
| ARHGAP15    | LF 438         | rs11538443       | N.D.                  | 0,00                         | NRF           | 10     | IVFGPTFLRA                    |
| ARHGAP15    | LF 438         | rs11538443       | N.D.                  | 0,00                         | NRF           | 10     | IVFGPTLLRA                    |
| ARHGAP15    | LF 438         | rs11538443       | N.D.                  | 0,00                         | ARF           | 10     | KLGDICIWTYL                   |
| ARHGAP15    | LF 438         | rs11538443       | N.D.                  | 0,00                         | ARF           | 11     | KLGDICIWTYLS                  |
| ARHGAP15    | LF 438         | rs11538443       | N.D.                  | 0,00                         | ARF           | 11     | KLGDICIWTYPS                  |
| ARHGAP15    | LF 438         | rs11538443       | N.D.                  | 0,00                         | NRF           | 11     | LLRAENETGNM                   |
| ARHGAP15    | LF 438         | rs11538443       | N.D.                  | 0,00                         | NRF           | 10     | SLGIVFGPTL                    |
| ARHGAP15    | LF 438         | rs11538443       | N.D.                  | 0,00                         | NRF           | 9      | TLLRAENET                     |
| ARHGAP15    | LF 438         | rs11538443       | N.D.                  | 0,00                         | NRF           | 11     | TLLRAENETGN                   |
| ARHGAP25    | AA 384         | rs17604346       | 0,01                  | 0,02                         | ARF           | 9      | MLLKTSEFL                     |
| ARHGAP25    | AA 384         | rs17604346       | 0,01                  | 0,02                         | ARF           | 11     | MLLKTSEFLGQ                   |
| ARHGAP25    | RS 555         | rs4241344        | 0,43                  | 0,27                         | NRF           | 10     | KLILCRVWSK                    |
| ARHGAP25    | RS 555/MT 556  | Combination      | 0,43/0,44             | 0,27/N.D.                    | NRF           | 9      | SLQSTVQEL                     |
| ARHGAP25    | RS 555         | rs4241344        | 0,43                  | 0,27                         | NRF           | 9      | SLQRMVQEL                     |
| ARHGAP25    | RS 555         | rs4241344        | 0,43                  | 0,27                         | NRF           | 9      | SLQSMVQEL                     |
| ARHGAP25    | RS 555         | rs4241344        | 0,43                  | 0,27                         | NRF           | 11     | SLQSMVQELRK                   |
| ARHGAP25    | RS 555         | rs4241344        | 0,43                  | 0,27                         | NRF           | 10     | SMVQELRKEI                    |
| ARHGAP25    | MT 556         | rs10177248       | 0,44                  | N.D.                         | NRF           | 9      | MVQELRKEI                     |
| ARHGAP25    | MT 556         | rs10177248       | 0,44                  | N.D.                         | NRF           | 10     | RMVQELRKEI                    |
| ARHGAP25    | MT 556         | rs10177248       | 0,44                  | N.D.                         | NRF           | 9      | SLQRTVQEL                     |
| ARHGAP25    | MT 556         | rs10177248       | 0,44                  | N.D.                         | NRF           | 9      | TVQELRKEI                     |
| ATP2A3      | W*stop 77      | rs17846878       | N.D.                  | 0,00                         | NRF           | 9      | ALVSFVLAW                     |
| ATP2A3      | W*stop 77      | rs17846878       | N.D.                  | 0,00                         | ARF           | 9      | LLCPGLIRG                     |
| ATP2A3      | W*stop 77      | rs17846878       | N.D.                  | 0,00                         | ARF           | 10     | LLCPGLIRGG                    |
| ATP2A3      | W*stop 77      | rs17846878       | N.D.                  | 0,00                         | ARF           | 9      | LLCPGLVRG                     |
| ATP2A3      | W*stop 77      | rs17846878       | N.D.                  | 0,00                         | ARF           | 10     | LLCPGLVRGG                    |
| ATP2A3      | LL 302         | rs9915542        | N.D.                  | 0,00                         | ARF           | 10     | CLLQDRRGL                     |
| ATP2A3      | LL 302         | rs9915542        | N.D.                  | 0,00                         | ARF           | 9      | LLLQDRRGL                     |
| ATP2A3      | AA 424         | rs1800911        | N.D.                  | 0,44                         | ARF           | 10     | RLWTTTRPRV                    |
| ATP2A3      | ND 458         | rs9913158        | N.D.                  | 0,00                         | NRF           | 9      | KMNVFDTDL                     |
| ATP2A3      | ND 458         | rs9913158        | N.D.                  | 0,00                         | NRF           | 9      | KMNVFDTNL                     |
| ATP2A3      | ND 458         | rs9913158        | N.D.                  | 0,00                         | NRF           | 9      | NVFDTDLQA                     |
| ATP2A3      | ND 458         | rs9913158        | N.D.                  | 0,00                         | NRF           | 10     | NVFDTDLQAL                    |
| ATP2A3      | ND 458         | rs9913158        | N.D.                  | 0,00                         | NRF           | 9      | NVFDTNLQA                     |
| ATP2A3      | ND 458         | rs9913158        | N.D.                  | 0,00                         | NRF           | 10     | NVFDTNLQAL                    |
| ATP2A3      | ND 458         | rs9913158        | N.D.                  | 0,00                         | NRF           | 9      | TNLQALSRV                     |
| ATP2A3      | DE 519         | rs12946879       | N.D.                  | 0,00                         | NRF           | 11     | KMFVKGAPDSV                   |
| ATP2A3      | DE 519         | rs12946879       | N.D.                  | 0,00                         | NRF           | 11     | KMFVKGAPESV                   |
| ATP2A3      | DE 519         | rs12946879       | N.D.                  | 0,00                         | NRF           | 11     | MFVKGAPESVI                   |
| ATP2A3      | CR 674         | rs9895012        | N.D.                  | 0,07                         | ARF           | 10     | LLLPRGART                     |

|        |             |             |           |           |     |    |                                                          |
|--------|-------------|-------------|-----------|-----------|-----|----|----------------------------------------------------------|
| ATP2A3 | CR 674      | rs9895012   | N.D.      | 0,07      | ARF | 11 | LLLRPRGARTQ                                              |
| ATP2A3 | CR 674      | rs9895012   | N.D.      | 0,07      | NRF | 9  | RTA <b>C</b> CFARV                                       |
| ATP2A3 | CR 674      | rs9895012   | N.D.      | 0,07      | NRF | 9  | RTA <b>R</b> CFARV                                       |
| ATP2A3 | HQ 869      | rs11654827  | 0,01      | 0,00      | NRF | 10 | IN <b>F</b> YHLRNFL                                      |
| ATP2A3 | HQ 869      | rs11654827  | 0,01      | 0,00      | NRF | 10 | IN <b>F</b> YQLRNFL                                      |
| ATP2A3 | RR 1034     | rs887387    | 0,43      | 0,34      | ARF | 9  | GT <b>G</b> W <b>S</b> LR <b>C</b> V                     |
| ATP2A3 | RR 1034     | rs887387    | 0,43      | 0,34      | ARF | 9  | WE <b>Q</b> <b>G</b> GV <b>S</b> GV                      |
| ATP2A3 | RR 1034     | rs887387    | 0,43      | 0,34      | ARF | 9  | WE <b>Q</b> <b>S</b> GV <b>S</b> GV                      |
| BTK    | SS 318      | rs5991926   | N.D.      | 0,00      | ARF | 10 | <b>C</b> L <b>L</b> L <b>N</b> P <b>Q</b> G <b>T</b>     |
| BTK    | SS 318      | rs5991926   | N.D.      | 0,00      | ARF | 10 | KL <b>A</b> NI <b>Q</b> <b>C</b> L <b>L</b>              |
| BTK    | SS 318      | rs5991926   | N.D.      | 0,00      | ARF | 10 | KL <b>A</b> NI <b>Q</b> <b>C</b> P <b>L</b>              |
| BTK    | SS 318      | rs5991926   | N.D.      | 0,00      | ARF | 10 | LANI <b>Q</b> <b>C</b> L <b>L</b>                        |
| BTK    | SS 318      | rs5991926   | N.D.      | 0,00      | ARF | 10 | Q <b>S</b> W <b>Q</b> I <b>S</b> V <b>C</b> V            |
| BTK    | SS 318      | rs5991926   | N.D.      | 0,00      | ARF | 10 | Q <b>S</b> W <b>Q</b> I <b>S</b> V <b>R</b> V            |
| BTK    | CY 361      | rs28935478  | N.D.      | 0,00      | NRF | 11 | ELIN <b>Y</b> H <b>Q</b> H <b>N</b> S <b>A</b>           |
| BTK    | CY 361      | rs28935478  | N.D.      | 0,00      | ARF | 11 | SL <b>S</b> SL <b>T</b> A <b>I</b> ST <b>T</b>           |
| BTK    | CY 361      | rs28935478  | N.D.      | 0,00      | ARF | 10 | SL <b>S</b> SL <b>T</b> A <b>I</b> ST                    |
| BTK    | CY 361      | rs28935478  | N.D.      | 0,00      | ARF | 11 | SL <b>S</b> SL <b>T</b> I <b>S</b> T <b>T</b>            |
| BTK    | CY 361      | rs28935478  | N.D.      | 0,00      | ARF | 10 | SL <b>S</b> SL <b>T</b> T <b>I</b> ST                    |
| BTK    | CY 361      | rs28935478  | N.D.      | 0,00      | ARF | 11 | SL <b>T</b> A <b>I</b> ST <b>L</b> Q <b>D</b>            |
| BTK    | CY 361      | rs28935478  | N.D.      | 0,00      | ARF | 9  | SL <b>T</b> A <b>I</b> ST <b>L</b>                       |
| BTK    | CY 361      | rs28935478  | N.D.      | 0,00      | ARF | 9  | SL <b>T</b> T <b>I</b> ST <b>L</b>                       |
| BTK    | CC 633      | rs1135363   | N.D.      | 0,21      | ARF | 11 | TV <b>A</b> GM <b>R</b> K <b>Q</b> MS <b>V</b>           |
| BTK    | CC 633      | rs1135363   | N.D.      | 0,21      | ARF | 11 | TV <b>V</b> GM <b>R</b> K <b>Q</b> MS <b>V</b>           |
| BTK    | CC 633      | rs1135363   | N.D.      | 0,21      | ARF | 10 | V <b>V</b> GM <b>R</b> K <b>Q</b> MS <b>V</b>            |
| BTK    | CC 633      | rs1135363   | N.D.      | 0,21      | ARF | 10 | Y <b>I</b> PS <b>C</b> T <b>V</b> A <b>G</b> M           |
| CCL3   | PP 60       | rs1130371   | 0,43      | 0,04      | ARF | 11 | TL <b>R</b> RA <b>A</b> S <b>A</b> PS <b>L</b>           |
| CCL3   | GS 69       | rs5029408   | N.D.      | 0,07      | NRF | 9  | FL <b>T</b> K <b>R</b> G <b>R</b> Q <b>V</b>             |
| CCL3   | GS 69       | rs5029408   | N.D.      | 0,07      | NRF | 9  | FL <b>T</b> K <b>R</b> S <b>R</b> Q <b>V</b>             |
| CCL3   | GS 69       | rs5029408   | N.D.      | 0,07      | NRF | 11 | FL <b>T</b> K <b>R</b> S <b>R</b> Q <b>V</b> C <b>A</b>  |
| CD37   | CC 7        | rs11545491  | N.D.      | 0,00      | ARF | 11 | EL <b>P</b> Q <b>P</b> H <b>Q</b> V <b>L</b> P <b>L</b>  |
| CD37   | CC 7        | rs11545491  | N.D.      | 0,00      | ARF | 11 | EL <b>S</b> Q <b>P</b> H <b>Q</b> V <b>L</b> P <b>L</b>  |
| CD37   | CC 7        | rs11545491  | N.D.      | 0,00      | ARF | 10 | L <b>P</b> Q <b>P</b> H <b>Q</b> V <b>L</b> P <b>L</b>   |
| CD37   | CC 7        | rs11545491  | N.D.      | 0,00      | ARF | 10 | L <b>S</b> Q <b>P</b> H <b>Q</b> V <b>L</b> P <b>L</b>   |
| CD37   | II 38       | rs354021    | 0,21      | 0,18      | ARF | 10 | HL <b>D</b> PH <b>R</b> Q <b>D</b> Q <b>L</b>            |
| CD48   | LL 16       | rs11541827  | N.D.      | 0,01      | ARF | 9  | F <b>V</b> SG <b>S</b> G <b>I</b> A <b>I</b>             |
| CD48   | LL 16       | rs11541827  | N.D.      | 0,01      | ARF | 10 | F <b>V</b> SG <b>S</b> G <b>I</b> A <b>I</b> A           |
| CD48   | LL 16       | rs11541827  | N.D.      | 0,01      | ARF | 9  | F <b>V</b> SG <b>S</b> G <b>I</b> A <b>T</b>             |
| CD48   | LL 16       | rs11541827  | N.D.      | 0,01      | ARF | 10 | F <b>V</b> SG <b>S</b> G <b>I</b> A <b>T</b> A           |
| CD48   | QE 102      | rs2295615   | 0,26      | N.D.      | ARF | 10 | AL <b>Y</b> IS <b>K</b> V <b>Q</b> K <b>E</b>            |
| CD48   | QE 102      | rs2295615   | 0,26      | N.D.      | ARF | 10 | AL <b>Y</b> IS <b>K</b> V <b>Q</b> K <b>Q</b>            |
| CD48   | QE 102      | rs2295615   | 0,26      | N.D.      | ARF | 11 | K <b>Q</b> DN <b>S</b> T <b>Y</b> IM <b>R</b> V          |
| CD48   | QE 102      | rs2295615   | 0,26      | N.D.      | ARF | 11 | K <b>V</b> Q <b>K</b> ED <b>N</b> ST <b>Y</b> I          |
| CD48   | QE 102      | rs2295615   | 0,26      | N.D.      | ARF | 11 | K <b>V</b> Q <b>K</b> Q <b>D</b> NST <b>Y</b> I          |
| CD48   | LL 150      | rs17851383  | N.D.      | 0,00      | ARF | 9  | LL <b>F</b> ET <b>V</b> M <b>C</b> D                     |
| CD48   | LL 150      | rs17851383  | N.D.      | 0,00      | ARF | 10 | LL <b>F</b> ET <b>V</b> M <b>C</b> D <b>T</b>            |
| CD48   | LL 150      | rs17851383  | N.D.      | 0,00      | ARF | 10 | LL <b>S</b> ET <b>V</b> M <b>C</b> D <b>T</b>            |
| CD52   | SN 40       | rs1071849   | 0,46      | 0,28      | NRF | 11 | NI <b>S</b> GG <b>I</b> FL <b>F</b> FF <b>V</b>          |
| CD52   | SN 40       | rs1071849   | 0,46      | 0,28      | NRF | 11 | QT <b>S</b> SP <b>S</b> ASS <b>S</b> I                   |
| CD52   | SN 40/MI 41 | Combination | 0,46/0,46 | 0,28/N.D. | NRF | 11 | QT <b>S</b> SP <b>S</b> ASS <b>S</b> SM                  |
| CD52   | SN 40       | rs1071849   | 0,46      | 0,28      | NRF | 11 | NI <b>S</b> GG <b>I</b> FL <b>F</b> FF <b>V</b>          |
| CD52   | MI 41       | rs17645     | 0,46      | N.D.      | NRF | 10 | IS <b>G</b> G <b>I</b> FL <b>F</b> FF <b>V</b>           |
| CD52   | MI 41       | rs17645     | 0,46      | N.D.      | NRF | 10 | MS <b>G</b> G <b>I</b> FL <b>F</b> FF <b>V</b>           |
| CD52   | MI 41       | rs17645     | 0,46      | N.D.      | NRF | 11 | NM <b>S</b> GG <b>I</b> FL <b>F</b> FF <b>V</b>          |
| CD52   | MI 41       | rs17645     | 0,46      | N.D.      | NRF | 11 | QT <b>S</b> SP <b>S</b> ASS <b>S</b> NI                  |
| CD52   | MI 41       | rs17645     | 0,46      | N.D.      | NRF | 11 | QT <b>S</b> SP <b>S</b> ASS <b>S</b> N <b>M</b>          |
| CD69   | NN 166      | rs11052883  | 0,066     | 0,04      | ARF | 9  | KE <b>F</b> NN <b>W</b> F <b>K</b> V                     |
| CD69   | NN 166      | rs11052883  | 0,066     | 0,04      | ARF | 9  | KE <b>F</b> NN <b>W</b> F <b>N</b> V                     |
| CD69   | NN 166      | rs11052883  | 0,066     | 0,04      | ARF | 9  | K <b>V</b> T <b>G</b> S <b>D</b> K <b>C</b> V            |
| CD69   | NN 166      | rs11052883  | 0,03      | 0,04      | ARF | 10 | L <b>T</b> T <b>G</b> S <b>T</b> L <b>Q</b> GL           |
| CD69   | NN 166      | rs11052883  | 0,03      | 0,04      | ARF | 10 | L <b>T</b> T <b>G</b> S <b>K</b> L <b>Q</b> GL           |
| CD69   | NN 166      | rs11052883  | 0,03      | 0,04      | ARF | 11 | N <b>L</b> T <b>T</b> G <b>S</b> T <b>L</b> Q <b>GL</b>  |
| CD69   | NN 166      | rs11052883  | 0,066     | 0,04      | ARF | 11 | N <b>L</b> T <b>T</b> G <b>S</b> K <b>L</b> Q <b>GL</b>  |
| CD69   | NN 166      | rs11052883  | 0,066     | 0,04      | ARF | 9  | N <b>V</b> T <b>G</b> S <b>D</b> K <b>C</b> V            |
| CD69   | NN 166      | rs11052883  | 0,03      | 0,04      | ARF | 11 | Q <b>M</b> A <b>K</b> N <b>L</b> T <b>T</b> G <b>S</b> T |
| CD69   | NN 166      | rs11052883  | 0,066     | 0,04      | ARF | 9  | S <b>K</b> L <b>Q</b> GL <b>T</b> S <b>V</b>             |
| CD69   | NN 166      | rs11052883  | 0,03      | 0,04      | ARF | 9  | S <b>T</b> L <b>Q</b> GL <b>T</b> S <b>V</b>             |
| CD69   | NN 166      | rs11052883  | 0,03      | 0,04      | ARF | 11 | S <b>T</b> L <b>Q</b> GL <b>T</b> S <b>V</b> FF          |
| CD69   | NN 166      | rs11052883  | 0,03      | 0,04      | ARF | 9  | T <b>T</b> G <b>S</b> T <b>L</b> Q <b>GL</b>             |
| CD69   | NN 166      | rs11052883  | 0,03      | 0,04      | ARF | 9  | T <b>T</b> G <b>S</b> K <b>L</b> Q <b>GL</b>             |
| CD79b  | LL 20       | rs11555057  | N.D.      | 0,00      | ARF | 9  | PL <b>D</b> GG <b>V</b> A <b>A</b> A                     |
| CD79b  | LL 20       | rs11555057  | N.D.      | 0,00      | ARF | 9  | PL <b>D</b> GG <b>V</b> A <b>A</b> V                     |
| CD79b  | LL 20       | rs11555057  | N.D.      | 0,00      | ARF | 10 | Q <b>P</b> LD <b>G</b> G <b>V</b> A <b>A</b> V           |
| CD79b  | CC 122      | rs2070776   | 0,47      | 0,27      | ARF | 10 | GL <b>R</b> T <b>M</b> A <b>S</b> T <b>S</b> V           |
| CD79b  | CC 122      | rs2070776   | 0,47      | 0,27      | ARF | 10 | LLL <b>P</b> A <b>E</b> V <b>Q</b> QH                    |
| CD79b  | CC 122      | rs2070776   | 0,47      | 0,27      | ARF | 11 | LLL <b>P</b> A <b>E</b> V <b>Q</b> QH <b>L</b>           |
| CD79b  | CC 122      | rs2070776   | 0,47      | 0,27      | ARF | 11 | LLL <b>S</b> A <b>E</b> V <b>Q</b> QH <b>L</b>           |
| CD79b  | CC 122      | rs2070776   | 0,47      | 0,27      | ARF | 10 | LL <b>P</b> A <b>E</b> V <b>Q</b> QH <b>L</b>            |
| CD79b  | CC 122      | rs2070776   | 0,47      | 0,27      | ARF | 10 | LL <b>S</b> A <b>E</b> V <b>Q</b> QH <b>L</b>            |
| CD79b  | CC 122      | rs2070776   | 0,47      | 0,27      | ARF | 11 | S <b>G</b> L <b>R</b> T <b>M</b> A <b>S</b> T <b>S</b> V |
| CD79b  | CC 122      | rs2070776   | 0,47      | 0,27      | ARF | 11 | T <b>M</b> A <b>S</b> T <b>S</b> A <b>S</b> R <b>S</b> A |
| CD79b  | CC 122      | rs2070776   | 0,47      | 0,27      | ARF | 11 | T <b>M</b> A <b>S</b> T <b>S</b> V <b>S</b> R <b>S</b> A |
| CD79b  | KE 217      | rs1063625   | N.D.      | 0,00      | NRF | 10 | D <b>I</b> V <b>T</b> L <b>R</b> T <b>G</b> E <b>V</b>   |
| CD79b  | KE 217      | rs1063625   | N.D.      | 0,00      | NRF | 10 | D <b>I</b> V <b>T</b> L <b>R</b> T <b>G</b> K <b>V</b>   |
| CD79b  | KE 217      | rs1063625   | N.D.      | 0,00      | NRF | 9  | R <b>T</b> G <b>E</b> V <b>K</b> W <b>S</b> V            |
| CD79b  | KE 217      | rs1063625   | N.D.      | 0,00      | NRF | 9  | R <b>T</b> G <b>K</b> V <b>K</b> W <b>S</b> V            |
| CD79b  | KE 217      | rs1063625   | N.D.      | 0,00      | NRF | 11 | TL <b>R</b> T <b>G</b> E <b>V</b> K <b>W</b> S <b>V</b>  |
| CENTB1 | YY 166      | rs3809828   | 0,13      | 0,07      | ARF | 9  | W <b>V</b> P <b>G</b> T <b>G</b> T <b>G</b> L            |

|        |         |            |       |      |     |    |             |
|--------|---------|------------|-------|------|-----|----|-------------|
| CENTB1 | YY 166  | rs3809828  | 0,13  | 0,07 | ARF | 9  | WVSGTGTGL   |
| CORO1A | DH 80   | rs11555342 | N.D.  | 0,00 | ARF | 9  | GLWPHSPCA   |
| CORO1A | DH 80   | rs11555342 | N.D.  | 0,00 | ARF | 9  | GLWRHSPCA   |
| CORO1A | DH 80   | rs11555342 | N.D.  | 0,00 | NRF | 9  | TVCGDTAPV   |
| CORO1A | DH 80   | rs11555342 | N.D.  | 0,00 | NRF | 9  | TVCGHTAPV   |
| CORO1A | LL 404  | rs11555339 | N.D.  | 0,00 | ARF | 10 | WLRTPKPEGV  |
| CORO1A | PT 443  | rs1053574  | 0,04  | 0,00 | NRF | 9  | EMRKLQATV   |
| CORO1A | PT 443  | rs1053574  | 0,04  | 0,00 | NRF | 9  | KLQAPVQEL   |
| CORO1A | PT 443  | rs1053574  | 0,04  | 0,00 | NRF | 9  | KLQATVQEL   |
| CORO1A | PT 443  | rs1053574  | 0,04  | 0,00 | NRF | 9  | TVQELQKRL   |
| CPVL   | QP 112  | rs11542982 | N.D.  | 0,00 | NRF | 10 | GQGGSSMFGL  |
| CPVL   | RH 398  | rs1052200  | 0,3   | 0,15 | NRF | 9  | AAALTEHSL   |
| CPVL   | RH 398  | rs1052200  | 0,3   | 0,15 | NRF | 9  | AAALTERSL   |
| CPVL   | RH 398  | rs1052200  | 0,3   | 0,15 | NRF | 10 | ALTEHSLMGM  |
| CPVL   | RH 398  | rs1052200  | 0,3   | 0,15 | NRF | 10 | ALTERSLMGM  |
| CPVL   | RH 398  | rs1052200  | 0,3   | 0,15 | NRF | 11 | IVAAALTEHSL |
| CPVL   | RH 398  | rs1052200  | 0,3   | 0,15 | NRF | 11 | IVAAALTERSL |
| CPVL   | VA 435  | rs7313     | 0,47  | 0,42 | NRF | 9  | EVAGYIRQV   |
| CPVL   | VA 435  | rs7313     | 0,47  | 0,42 | ARF | 11 | LVTSGKRVTSI |
| CPVL   | VA 435  | rs7313     | 0,47  | 0,42 | ARF | 9  | LVTSGKWVT   |
| CPVL   | VA 435  | rs7313     | 0,47  | 0,42 | NRF | 9  | RQAGDFHQV   |
| CPVL   | VA 435  | rs7313     | 0,47  | 0,42 | NRF | 9  | RQVGDFFHQV  |
| CPVL   | VA 435  | rs7313     | 0,41  | 0,42 | ARF | 10 | RVTSIRLFEV  |
| CPVL   | VA 435  | rs7313     | 0,47  | 0,42 | ARF | 10 | VTSGKRVTSI  |
| CPVL   | VA 435  | rs7313     | 0,47  | 0,42 | ARF | 10 | VTSGKWVTSI  |
| CPVL   | VA 435  | rs7313     | 0,41  | 0,42 | ARF | 10 | WVTSIRLFEV  |
| CPVL   | VA 435  | rs7313     | 0,47  | 0,42 | ARF | 9  | WLVTSGKRV   |
| CPVL   | VA 435  | rs7313     | 0,47  | 0,42 | ARF | 10 | WLVTSGKRVV  |
| CPVL   | VA 435  | rs7313     | 0,47  | 0,42 | ARF | 9  | WLVTSGKWV   |
| CPVL   | VA 435  | rs7313     | 0,47  | 0,42 | ARF | 10 | WLVTSGKWVT  |
| CSF3R  | VV 36   | rs3918011  | 0,01  | 0,01 | ARF | 11 | FTWGIPSQPPA |
| CSF3R  | VV 36   | rs3918011  | 0,01  | 0,01 | ARF | 10 | SQPPSFTWGI  |
| CSF3R  | VV 36   | rs3918011  | 0,01  | 0,01 | ARF | 10 | SQPPSSTWGI  |
| CSF3R  | VV 36   | rs3918011  | 0,01  | 0,01 | ARF | 11 | STWGIPSQPPA |
| CSF3R  | VV 36   | rs3918011  | 0,01  | 0,01 | ARF | 9  | SVSQPPSFT   |
| CSF3R  | AA 242  | rs3918017  | 0,02  | N.D. | ARF | 11 | LLPQAAAYSCA |
| CSF3R  | ND 320  | rs3918018  | 0,07  | 0,13 | ARF | 9  | APAWPLEQL   |
| CSF3R  | ND 320  | rs3918018  | 0,07  | 0,13 | ARF | 9  | APAWPLERL   |
| CSF3R  | ND 320  | rs3918018  | 0,07  | 0,13 | ARF | 10 | LAPAWPLEQL  |
| CSF3R  | ND 320  | rs3918018  | 0,07  | 0,13 | ARF | 10 | LAPAWPLERL  |
| CSF3R  | RQ 346  | rs3917974  | 0,04  | N.D. | NRF | 9  | QLDPRTVQL   |
| CSF3R  | RQ 346  | rs3917974  | 0,04  | N.D. | NRF | 10 | RQLDPRTVQL  |
| CSF3R  | RQ 346  | rs3917974  | 0,04  | N.D. | NRF | 9  | RQLDPRTVQL  |
| CSF3R  | RR 418  | rs3917980  | 0,4   | N.D. | ARF | 10 | ITQPGPLAPL  |
| CSF3R  | RR 418  | rs3917980  | 0,4   | N.D. | ARF | 10 | ITQPGPLVPL  |
| CSF3R  | RR 418  | rs3917980  | 0,4   | N.D. | ARF | 9  | TQPGPLAPL   |
| CSF3R  | RR 418  | rs3917980  | 0,4   | N.D. | ARF | 9  | TQPGPLVPL   |
| CSF3R  | QR 440  | rs3918020  | 0,35  | 0,00 | NRF | 11 | AMARDPHSLWV |
| CSF3R  | QR 440  | rs3918020  | 0,35  | 0,00 | NRF | 11 | AMARDPHSLWV |
| CSF3R  | QR 440  | rs3918020  | 0,35  | 0,00 | NRF | 9  | AMARDPHSL   |
| CSF3R  | QR 440  | rs3918020  | 0,35  | 0,00 | NRF | 9  | AMARDPHSLWV |
| CSF3R  | QR 440  | rs3918020  | 0,35  | 0,00 | NRF | 10 | MAQDPHSLWV  |
| CSF3R  | QR 440  | rs3918020  | 0,35  | 0,00 | NRF | 10 | MARDPHSLWV  |
| CSF3R  | HD 510  | rs3917991  | 0,12  | 0,02 | ARF | 9  | LVPGHHGTL   |
| CSF3R  | HD 510  | rs3917991  | 0,12  | 0,02 | ARF | 9  | SLVPAHHGT   |
| CSF3R  | HD 510  | rs3917991  | 0,12  | 0,02 | ARF | 10 | SLVPAHHGTL  |
| CSF3R  | HD 510  | rs3917991  | 0,12  | 0,02 | ARF | 9  | SLVPGHHGT   |
| CSF3R  | HD 510  | rs3917991  | 0,12  | 0,02 | ARF | 10 | SLVPGHHGTL  |
| DOCK2  | QQ 784  | rs13155521 | 0,05  | 0,06 | ARF | 9  | SIQNYHPFA   |
| DOCK2  | YY 1438 | rs17647491 | 0,02  | 0,04 | ARF | 10 | IQLCAKVPLL  |
| DOCK2  | YY 1438 | rs17647491 | 0,02  | 0,04 | ARF | 9  | IQLCAKVPL   |
| DOCK2  | YY 1438 | rs17647491 | 0,02  | 0,04 | ARF | 10 | IQLRAKVPLL  |
| DOCK2  | YY 1438 | rs17647491 | 0,02  | 0,04 | ARF | 9  | IQLRAKVPL   |
| DOCK2  | YY 1438 | rs17647491 | 0,02  | 0,04 | ARF | 9  | KLLQIQLCA   |
| DOCK2  | YY 1438 | rs17647491 | 0,02  | 0,04 | ARF | 11 | KLLQIQLCAKV |
| DOCK2  | YY 1438 | rs17647491 | 0,02  | 0,04 | ARF | 11 | KLLQIQLRAKV |
| DOCK2  | YY 1438 | rs17647491 | 0,02  | 0,04 | ARF | 9  | KLLQIQLRA   |
| DOCK2  | YY 1438 | rs17647491 | 0,02  | 0,04 | ARF | 10 | LLQIQLCAKV  |
| DOCK2  | YY 1438 | rs17647491 | 0,02  | 0,04 | ARF | 10 | LLQIQLRAKV  |
| DOCK2  | YY 1438 | rs17647491 | 0,02  | 0,04 | ARF | 9  | LQIQLCAKV   |
| DOCK2  | YY 1438 | rs17647491 | 0,02  | 0,04 | ARF | 9  | LQIQLRAKV   |
| DOCK2  | YY 1438 | rs17647491 | 0,02  | 0,04 | ARF | 10 | LIQLCAKVPL  |
| DOCK2  | YY 1438 | rs17647491 | 0,02  | 0,04 | ARF | 10 | QIQLRAKVPL  |
| DOCK2  | YY 1438 | rs17647491 | 0,02  | 0,04 | ARF | 9  | QLCAKVPLL   |
| DOCK2  | YY 1438 | rs17647491 | 0,02  | 0,04 | ARF | 9  | QLRAKVPLL   |
| DOCK2  | YY 1438 | rs17647491 | 0,018 | 0,04 | ARF | 9  | RLTSTNPTM   |
| DOCK2  | YY 1438 | rs17647491 | 0,018 | 0,04 | ARF | 9  | RLTSTNPTT   |
| DOCK2  | RR 1632 | rs1045168  | 0,34  | 0,29 | ARF | 10 | LTLTTGEWAA  |
| DOCK2  | RR 1632 | rs1045168  | 0,34  | 0,29 | ARF | 10 | LTLTTGEWAV  |
| DOCK2  | RR 1632 | rs1045168  | 0,34  | 0,29 | ARF | 9  | LTLTTGEWAA  |
| DOCK2  | RR 1632 | rs1045168  | 0,34  | 0,29 | ARF | 9  | LTLTTGEWAV  |
| DOCK2  | RR 1632 | rs1045168  | 0,34  | 0,29 | ARF | 10 | TTGEWAVPGL  |
| DOK2   | PA 152  | rs1140295  | N.D.  | 0,00 | ARF | 10 | SQSAPTRNFL  |
| DOK2   | PA 152  | rs1140295  | N.D.  | 0,00 | NRF | 10 | TVGPHKEFAV  |
| DOK2   | PA 152  | rs1140295  | N.D.  | 0,00 | NRF | 10 | TVGPHKEFPV  |
| DOK2   | PA 152  | rs1140295  | N.D.  | 0,00 | NRF | 9  | VGPHKEFAV   |
| DOK2   | PA 152  | rs1140295  | N.D.  | 0,00 | NRF | 9  | VGPHKEFPV   |

|        |        |            |      |      |     |    |                                                                        |
|--------|--------|------------|------|------|-----|----|------------------------------------------------------------------------|
| DOK2   | PA 152 | rs1140295  | N.D. | 0,00 | NRF | 11 | VTVGPHKEFAV                                                            |
| DOK2   | PA 152 | rs1140295  | N.D. | 0,00 | NRF | 11 | VTVGPHKEFPV                                                            |
| DOK2   | PT 336 | rs7824139  | N.D. | 0,00 | ARF | 10 | ALR <b>R</b> PCPLDL                                                    |
| DOK2   | PT 336 | rs7824139  | N.D. | 0,00 | ARF | 10 | ALR <b>S</b> PCPLDL                                                    |
| DOK2   | PT 336 | rs7824139  | N.D. | 0,00 | NRF | 10 | PLYDSIEE <b>P</b> L                                                    |
| DOK2   | PT 336 | rs7824139  | N.D. | 0,00 | NRF | 9  | PLYDSIEE <b>T</b>                                                      |
| DOK2   | PT 336 | rs7824139  | N.D. | 0,00 | NRF | 10 | PLYDSIEE <b>T</b> L                                                    |
| DOK2   | PT 336 | rs7824139  | N.D. | 0,00 | NRF | 9  | <b>T</b> LPPRPDHI                                                      |
| DOK2   | AA 387 | rs17853066 | 0,03 | N.D. | ARF | 10 | LLASSMSS <b>Q</b> L                                                    |
| DOK2   | AA 387 | rs17853066 | 0,03 | N.D. | ARF | 11 | LLASSMSS <b>Q</b> L <b>G</b>                                           |
| DOK2   | AA 387 | rs17853066 | 0,03 | N.D. | ARF | 9  | <b>Q</b> LGRISLLL                                                      |
| DOK2   | AA 387 | rs17853066 | 0,03 | N.D. | ARF | 10 | <b>Q</b> LGRISLLLA                                                     |
| DOK2   | AA 387 | rs17853066 | 0,03 | N.D. | ARF | 9  | <b>R</b> AGFLCFWL                                                      |
| DOK2   | AA 387 | rs17853066 | 0,03 | N.D. | ARF | 11 | SMSS <b>Q</b> LGRISL                                                   |
| DOK2   | AA 387 | rs17853066 | 0,03 | N.D. | ARF | 9  | SMSS <b>Q</b> L <b>G</b> R <b>I</b>                                    |
| DOK2   | AA 387 | rs17853066 | 0,03 | N.D. | ARF | 11 | SMSS <b>Q</b> <b>P</b> GRISL                                           |
| DOK2   | AA 387 | rs17853066 | 0,03 | N.D. | ARF | 9  | <b>S</b> QLGRISLL                                                      |
| DOK2   | AA 387 | rs17853066 | 0,03 | N.D. | ARF | 10 | <b>S</b> QLGRISLLL                                                     |
| DOK2   | AA 387 | rs17853066 | 0,03 | N.D. | ARF | 11 | TLLASSMSS <b>Q</b> L                                                   |
| DOK2   | AA 387 | rs17853066 | 0,03 | N.D. | ARF | 9  | <b>W</b> AGFLCFWL                                                      |
| DOK2   | AS 394 | rs2242241  | 0,01 | 0,30 | ARF | 9  | <b>R</b> AGFLC <b>F</b> WL                                             |
| DUSP22 | HR 119 | rs7768224  | 0,07 | 0,00 | ARF | 9  | <b>C</b> MLGDVPVPT                                                     |
| DUSP22 | HR 119 | rs7768224  | 0,07 | 0,00 | ARF | 10 | <b>M</b> LGDVPVPT <b>T</b>                                             |
| DUSP22 | HR 119 | rs7768224  | 0,07 | 0,00 | ARF | 9  | <b>R</b> MPCT <b>P</b> C <b>M</b> L                                    |
| DUSP22 | HR 119 | rs7768224  | 0,07 | 0,00 | ARF | 9  | <b>R</b> MPCT <b>P</b> C <b>V</b> L                                    |
| DUSP22 | HR 119 | rs7768224  | 0,07 | 0,00 | ARF | 10 | <b>V</b> LGDVPVPT <b>T</b>                                             |
| DUSP22 | PP 172 | rs1129085  | 0,24 | 0,37 | ARF | 9  | <b>S</b> <b>G</b> NSEVL <b>G</b> L                                     |
| DUSP22 | PP 172 | rs1129085  | 0,24 | 0,37 | ARF | 9  | <b>S</b> <b>R</b> NSEVL <b>G</b> L                                     |
| EVI2B  | VI 161 | rs17882145 | 0,01 | 0,00 | NRF | 10 | <b>Q</b> IPSRK <b>Q</b> V <b>T</b> V                                   |
| EVI2B  | VI 161 | rs17882145 | 0,01 | 0,00 | NRF | 10 | <b>S</b> V <b>Q</b> IPSRK <b>Q</b> V                                   |
| EVI2B  | VI 161 | rs17882145 | 0,01 | 0,00 | NRF | 9  | <b>V</b> QIPSRK <b>Q</b> V                                             |
| EVI2B  | GC 340 | rs17884293 | 0,01 | 0,00 | ARF | 9  | <b>C</b> L <b>D</b> HLPFWI                                             |
| EVI2B  | GC 340 | rs17884293 | 0,01 | 0,00 | ARF | 9  | <b>C</b> L <b>H</b> LPFWI                                              |
| EVI2B  | GC 340 | rs17884293 | 0,01 | 0,00 | NRF | 9  | <b>G</b> L <b>P</b> PPPLL                                              |
| EVI2B  | GC 340 | rs17884293 | 0,01 | 0,00 | NRF | 10 | <b>L</b> PPPP <b>L</b> LDL                                             |
| EVI2B  | GC 340 | rs17884293 | 0,01 | 0,00 | ARF | 9  | <b>M</b> MQVCL <b>H</b> H <b>L</b>                                     |
| EVI2B  | GC 340 | rs17884293 | 0,01 | 0,00 | ARF | 10 | <b>V</b> CL <b>H</b> LPFWI                                             |
| FCER1A | VA 230 | rs17851282 | N.D. | 0,00 | NRF | 9  | <b>F</b> IST <b>Q</b> Q <b>A</b> T                                     |
| FCER1A | VA 230 | rs17851282 | N.D. | 0,00 | NRF | 11 | <b>F</b> IST <b>Q</b> Q <b>A</b> T <b>F</b> L                          |
| FCER1A | VA 230 | rs17851282 | N.D. | 0,00 | NRF | 11 | <b>F</b> IST <b>Q</b> Q <b>V</b> T <b>F</b> L                          |
| FCER1A | VA 230 | rs17851282 | N.D. | 0,00 | NRF | 10 | <b>G</b> L <b>F</b> IST <b>Q</b> Q <b>A</b>                            |
| FCER1A | VA 230 | rs17851282 | N.D. | 0,00 | NRF | 10 | <b>G</b> L <b>F</b> IST <b>Q</b> Q <b>V</b>                            |
| FCER1A | VA 230 | rs17851282 | N.D. | 0,00 | NRF | 11 | <b>I</b> ST <b>Q</b> Q <b>A</b> T <b>F</b> L                           |
| FCER1A | VA 230 | rs17851282 | N.D. | 0,00 | NRF | 11 | <b>I</b> ST <b>Q</b> Q <b>V</b> T <b>F</b> L                           |
| FCER1A | VA 230 | rs17851282 | N.D. | 0,00 | NRF | 9  | <b>Q</b> Q <b>A</b> T <b>F</b> LL <b>K</b> I                           |
| FCER1A | VA 230 | rs17851282 | N.D. | 0,00 | NRF | 9  | <b>Q</b> Q <b>V</b> T <b>F</b> LL <b>K</b> I                           |
| FCER1A | VA 230 | rs17851282 | N.D. | 0,00 | NRF | 9  | <b>S</b> T <b>Q</b> Q <b>V</b> T <b>F</b> L                            |
| FCER1A | VA 230 | rs17851282 | N.D. | 0,00 | NRF | 9  | <b>T</b> Q <b>Q</b> Q <b>A</b> T <b>F</b> LL                           |
| FCER1A | VA 230 | rs17851282 | N.D. | 0,00 | NRF | 9  | <b>T</b> Q <b>Q</b> Q <b>V</b> T <b>F</b> LL                           |
| FLT3   | GD 7   | rs12872889 | 0,5  | N.D  | NRF | 9  | <b>A</b> L <b>A</b> R <b>D</b> A <b>G</b> T <b>V</b>                   |
| FLT3   | GD 7   | rs12872889 | 0,5  | N.D  | NRF | 11 | <b>A</b> L <b>A</b> R <b>D</b> A <b>G</b> T <b>V</b> <b>P</b> L        |
| FLT3   | GD 7   | rs12872889 | 0,5  | N.D  | NRF | 9  | <b>A</b> L <b>A</b> R <b>G</b> A <b>G</b> T <b>V</b>                   |
| FLT3   | GD 7   | rs12872889 | 0,5  | N.D  | NRF | 11 | <b>A</b> L <b>A</b> R <b>G</b> A <b>G</b> T <b>V</b> <b>P</b> L        |
| FLT3   | GD 7   | rs12872889 | 0,5  | N.D  | NRF | 10 | <b>G</b> A <b>G</b> T <b>V</b> P <b>L</b> L <b>V</b> V                 |
| FLT3   | GD 7   | rs12872889 | 0,5  | N.D  | NRF | 10 | <b>L</b> A <b>R</b> <b>D</b> A <b>G</b> T <b>V</b> <b>P</b> L          |
| FLT3   | GD 7   | rs12872889 | 0,5  | N.D  | NRF | 10 | <b>L</b> A <b>R</b> G <b>A</b> G <b>T</b> <b>V</b> <b>P</b> L          |
| FLT3   | GD 7   | rs12872889 | 0,5  | N.D  | NRF | 9  | <b>R</b> <b>D</b> A <b>G</b> T <b>V</b> P <b>L</b> L                   |
| FLT3   | GD 7   | rs12872889 | 0,5  | N.D  | NRF | 9  | <b>R</b> <b>G</b> A <b>G</b> T <b>V</b> P <b>L</b> L                   |
| FLT3   | DD 96  | rs7338903  | 0,08 | 0,22 | ARF | 9  | <b>S</b> M <b>P</b> Q <b>G</b> T <b>F</b> P <b>V</b>                   |
| FLT3   | DD 96  | rs7338903  | 0,08 | 0,22 | ARF | 9  | <b>S</b> <b>T</b> <b>P</b> Q <b>G</b> T <b>F</b> P <b>V</b>            |
| FLT3   | DD 96  | rs7338903  | 0,08 | 0,22 | ARF | 10 | <b>W</b> S <b>M</b> <b>P</b> Q <b>G</b> T <b>F</b> P <b>V</b>          |
| FLT3   | DD 96  | rs7338903  | 0,08 | 0,22 | ARF | 10 | <b>W</b> S <b>T</b> <b>P</b> Q <b>G</b> T <b>F</b> P <b>V</b>          |
| FLT3   | MT 227 | rs1933437  | 0,49 | 0,41 | NRF | 9  | <b>K</b> V <b>L</b> H <b>E</b> L <b>F</b> <b>G</b> <b>M</b>            |
| FLT3   | MT 227 | rs1933437  | 0,49 | 0,41 | NRF | 11 | <b>K</b> V <b>L</b> H <b>E</b> L <b>F</b> <b>G</b> <b>M</b> <b>D</b> I |
| FLT3   | MT 227 | rs1933437  | 0,49 | 0,41 | NRF | 9  | <b>K</b> V <b>L</b> H <b>E</b> L <b>F</b> <b>G</b> <b>T</b>            |
| FLT3   | MT 227 | rs1933437  | 0,49 | 0,41 | NRF | 11 | <b>K</b> V <b>L</b> H <b>E</b> L <b>F</b> <b>G</b> <b>T</b> <b>D</b> I |
| FLT3   | MT 227 | rs1933437  | 0,49 | 0,41 | NRF | 10 | <b>V</b> L <b>H</b> E <b>L</b> F <b>G</b> <b>M</b> <b>D</b> I          |
| FLT3   | MT 227 | rs1933437  | 0,49 | 0,41 | NRF | 10 | <b>V</b> L <b>H</b> E <b>L</b> F <b>G</b> <b>T</b> <b>D</b> I          |
| FMNL1  | NN 170 | rs7209538  | N.D. | 0,00 | ARF | 10 | <b>M</b> T <b>W</b> R <b>A</b> Q <b>T</b> <b>M</b> <b>G</b> L          |
| FMNL1  | NN 170 | rs7209538  | N.D. | 0,00 | ARF | 10 | <b>M</b> T <b>W</b> R <b>A</b> Q <b>T</b> <b>T</b> <b>G</b> L          |
| FMNL1  | NN 170 | rs7209538  | N.D. | 0,00 | ARF | 9  | <b>R</b> M <b>T</b> <b>W</b> R <b>A</b> Q <b>T</b> <b>M</b>            |
| FMNL1  | NN 170 | rs7209538  | N.D. | 0,00 | ARF | 11 | <b>R</b> M <b>T</b> <b>W</b> R <b>A</b> Q <b>T</b> <b>M</b> <b>G</b> L |
| FMNL1  | NN 170 | rs7209538  | N.D. | 0,00 | ARF | 9  | <b>R</b> M <b>T</b> <b>W</b> R <b>A</b> Q <b>T</b> <b>T</b>            |
| FMNL1  | NN 170 | rs7209538  | N.D. | 0,00 | ARF | 11 | <b>R</b> M <b>T</b> <b>W</b> R <b>A</b> Q <b>T</b> <b>T</b> <b>G</b> L |
| FMNL1  | SS 336 | rs12940312 | N.D. | 0,13 | ARF | 10 | <b>F</b> <b>G</b> <b>G</b> E <b>H</b> E <b>L</b> P <b>C</b> L          |
| FMNL1  | SS 336 | rs12940312 | N.D. | 0,13 | ARF | 10 | <b>F</b> <b>S</b> <b>G</b> E <b>H</b> E <b>L</b> P <b>C</b> L          |
| FMNL1  | SS 336 | rs12940312 | N.D. | 0,13 | ARF | 9  | <b>G</b> T <b>F</b> <b>G</b> E <b>H</b> E <b>L</b>                     |
| FMNL1  | SS 336 | rs12940312 | N.D. | 0,13 | ARF | 9  | <b>G</b> T <b>F</b> <b>S</b> <b>G</b> E <b>H</b> E <b>L</b>            |
| FMNL1  | SS 336 | rs12940312 | N.D. | 0,13 | ARF | 9  | <b>T</b> L <b>W</b> <b>Y</b> I <b>Q</b> <b>W</b> R <b>T</b>            |
| FMNL1  | SS 336 | rs12940312 | N.D. | 0,13 | ARF | 9  | <b>T</b> L <b>W</b> <b>Y</b> I <b>R</b> <b>W</b> R <b>T</b>            |
| FMNL1  | RP 511 | rs4792898  | N.D. | 0,38 | NRF | 9  | <b>I</b> L <b>P</b> V <b>A</b> V <b>A</b> T <b>R</b>                   |
| FMNL1  | RP 511 | rs4792898  | N.D. | 0,38 | ARF | 10 | <b>Q</b> L <b>G</b> A <b>A</b> V <b>M</b> L <b>R</b> L                 |
| FMNL1  | RP 511 | rs4792898  | N.D. | 0,38 | ARF | 10 | <b>Q</b> L <b>R</b> A <b>A</b> V <b>M</b> L <b>R</b> L                 |
| FMNL1  | RP 511 | rs4792898  | N.D. | 0,38 | ARF | 9  | <b>S</b> L <b>W</b> <b>Q</b> L <b>G</b> A <b>A</b> V                   |
| FMNL1  | RP 511 | rs4792898  | N.D. | 0,38 | ARF | 10 | <b>S</b> L <b>W</b> <b>Q</b> L <b>G</b> A <b>A</b> V <b>M</b>          |
| FMNL1  | RP 511 | rs4792898  | N.D. | 0,38 | ARF | 11 | <b>S</b> L <b>W</b> <b>Q</b> L <b>G</b> A <b>A</b> V <b>M</b> L        |
| FMNL1  | RP 511 | rs4792898  | N.D. | 0,38 | ARF | 9  | <b>S</b> L <b>W</b> <b>Q</b> L <b>R</b> A <b>A</b> V                   |

|       |        |            |       |      |     |    |              |
|-------|--------|------------|-------|------|-----|----|--------------|
| FMNL1 | RP 511 | rs4792898  | N.D.  | 0,38 | ARF | 10 | SLWQLRAAVM   |
| FMNL1 | RP 511 | rs4792898  | N.D.  | 0,38 | ARF | 11 | SLWQLRAAVML  |
| FMNL1 | RP 511 | rs4792898  | N.D.  | 0,38 | ARF | 9  | WQLGAAVML    |
| FMNL1 | RP 511 | rs4792898  | N.D.  | 0,38 | ARF | 9  | WQLRAAVML    |
| FMNL1 | EK 667 | rs11555736 | N.D.  | 0,00 | NRF | 11 | ELNDEEVLQEL  |
| FMNL1 | EK 667 | rs11555736 | N.D.  | 0,00 | NRF | 11 | ELNDEKVLQEL  |
| FMNL1 | EK 667 | rs11555736 | N.D.  | 0,00 | NRF | 10 | LNDEEVLQEL   |
| FMNL1 | EK 667 | rs11555736 | N.D.  | 0,00 | NRF | 10 | LNDEKVLQEL   |
| FMNL1 | EK 667 | rs11555736 | N.D.  | 0,00 | NRF | 11 | TVFTELNDEEV  |
| FMNL1 | EK 667 | rs11555736 | N.D.  | 0,00 | NRF | 11 | TVFTELNDEKV  |
| FBNP1 | SS 136 | rs17519205 | 0,15  | 0,08 | ARF | 9  | LAGSSLNLV    |
| FBNP1 | SS 136 | rs17519205 | 0,15  | 0,08 | ARF | 9  | LAGSSLNPV    |
| FBNP1 | SS 136 | rs17519205 | 0,15  | 0,08 | ARF | 9  | LVKGDLNAI    |
| FBNP1 | SS 136 | rs17519205 | 0,15  | 0,08 | ARF | 9  | NLVKGDINA    |
| FBNP1 | SS 136 | rs17519205 | 0,15  | 0,08 | ARF | 10 | NLVKGDINA    |
| FBNP1 | SS 136 | rs17519205 | 0,15  | 0,08 | ARF | 11 | NLVKGDINAIA  |
| FBNP1 | SS 136 | rs17519205 | 0,15  | 0,08 | ARF | 10 | RLAGSSLNLV   |
| FBNP1 | SS 136 | rs17519205 | 0,15  | 0,08 | ARF | 10 | RLAGSSLNPV   |
| FBNP1 | SS 136 | rs17519205 | 0,15  | 0,08 | ARF | 9  | RLAGSSLNL    |
| FBNP1 | SS 136 | rs17519205 | 0,15  | 0,08 | ARF | 11 | SRLAGSSLNLV  |
| FBNP1 | SS 136 | rs17519205 | 0,15  | 0,08 | ARF | 11 | SRLAGSSLNPV  |
| FOSB  | SG 33  | rs28381241 | 0,01  | N.D. | ARF | 11 | GLLQQSTHRRG  |
| FOSB  | SG 33  | rs28381241 | 0,01  | N.D. | ARF | 11 | GLLRQSTHRRG  |
| FOSB  | SG 33  | rs28381241 | 0,01  | N.D. | ARF | 11 | LLQQSTHRRGL  |
| FOSB  | SG 33  | rs28381241 | 0,01  | N.D. | ARF | 11 | LLRQSTHRRGL  |
| FOSB  | AA 39  | rs2282695  | 0,48  | 0,27 | ARF | 11 | GLLRQSTHRRG  |
| FOSB  | AA 39  | rs2282695  | 0,48  | 0,27 | ARF | 11 | GLLRQSTHRRR  |
| FOSB  | AA 39  | rs2282695  | 0,48  | 0,27 | ARF | 11 | LLRQSTHRRGL  |
| FOSB  | AA 39  | rs2282695  | 0,48  | 0,27 | ARF | 11 | LLRQSTHRRRL  |
| GATA2 | TA 164 | rs2335052  | 0,35  | 0,15 | ARF | 10 | GLPHYPYSSPL  |
| GATA2 | TA 164 | rs2335052  | 0,35  | 0,15 | ARF | 10 | NPLWIPFFRL   |
| GATA2 | TA 164 | rs2335052  | 0,35  | 0,15 | NRF | 11 | SLTPTATHSGS  |
| GATA2 | TA 164 | rs2335052  | 0,35  | 0,15 | NRF | 11 | SLTPTATHSGS  |
| GATA2 | TA 164 | rs2335052  | 0,35  | 0,15 | ARF | 10 | SPLWIPFFRL   |
| GATA2 | GG 480 | rs1126560  | N.D.  | 0,00 | NRF | 10 | GLGNRWTSRT   |
| GATA2 | GG 480 | rs1126560  | N.D.  | 0,00 | NRF | 9  | VQHGDHGL     |
| GATA2 | GG 480 | rs1126560  | N.D.  | 0,00 | NRF | 9  | VQHGDHGLV    |
| GNA15 | IM 187 | rs2230330  | 0,04  | 0,01 | ARF | 10 | AAACPPLAST   |
| GNA15 | IM 187 | rs2230330  | 0,04  | 0,01 | ARF | 10 | AAAYPPLAST   |
| GNA15 | IM 187 | rs2230330  | 0,04  | 0,01 | ARF | 9  | AAACPPLAST   |
| GNA15 | IM 187 | rs2230330  | 0,04  | 0,01 | ARF | 9  | AAAYPPLAST   |
| GNA15 | IM 187 | rs2230330  | 0,04  | 0,01 | NRF | 9  | VLRSRIPPT    |
| GNA15 | IM 187 | rs2230330  | 0,04  | 0,01 | NRF | 11 | VLRSRIPPTGI  |
| GNA15 | IM 187 | rs2230330  | 0,04  | 0,01 | NRF | 11 | VLRSRMPTTGI  |
| GNA15 | LL 232 | rs2074865  | 0,45  | 0,09 | ARF | 9  | RDRPHLPSL    |
| GNA15 | LL 339 | rs1637656  | 0,26  | 0,21 | ARF | 10 | RTIPTPFQPL   |
| GNA15 | LL 339 | rs1637656  | 0,26  | 0,21 | ARF | 10 | RTIPTPLQPL   |
| GNA15 | LL 339 | rs1637656  | 0,26  | 0,21 | ARF | 9  | TIPTPFQPL    |
| GNA15 | LL 339 | rs1637656  | 0,26  | 0,21 | ARF | 9  | TIPTPLQPL    |
| HSPA6 | GV 96  | rs428614   | N.D.  | 0,00 | ARF | 9  | FMTSSWGA     |
| HSPA6 | GV 96  | rs428614   | N.D.  | 0,00 | ARF | 11 | FMTSSWGA     |
| HSPA6 | GV 96  | rs428614   | N.D.  | 0,00 | ARF | 9  | FMTSSWGA     |
| HSPA6 | GV 96  | rs428614   | N.D.  | 0,00 | ARF | 11 | FMTSSWGA     |
| HSPA6 | AA 216 | rs391145   | 0,412 | N.D. | ARF | 9  | FSPPLTVSL    |
| HSPA6 | AA 216 | rs391145   | 0,412 | N.D. | ARF | 10 | RFSPLTLVSL   |
| HSPA6 | AA 216 | rs391145   | 0,412 | N.D. | ARF | 11 | RFSPLTLVSLV  |
| HSPA6 | AA 216 | rs391145   | 0,412 | N.D. | ARF | 10 | SMCRFSPLTL   |
| HSPA6 | AA 216 | rs391145   | 0,412 | N.D. | ARF | 11 | SMCRFSPLTLV  |
| HSPA6 | AA 216 | rs391145   | 0,412 | N.D. | ARF | 11 | SMCRFSPLTPV  |
| HSPA6 | LP 276 | rs393027   | 0,42  | 0,49 | NRF | 11 | LSSSTQATLEI  |
| HSPA6 | LP 276 | rs393027   | 0,42  | 0,49 | NRF | 11 | RTLSSSTQATL  |
| HSPA6 | LP 276 | rs393027   | 0,42  | 0,49 | NRF | 11 | RTPSSTQATL   |
| HSPA6 | LP 276 | rs393027   | 0,42  | 0,49 | NRF | 11 | RTLSSSTQATLE |
| HSPA6 | LP 276 | rs393027   | 0,42  | 0,49 | NRF | 10 | TLSSTQATL    |
| HSPA6 | KT 297 | rs41297718 | 0,02  | 0,06 | NRF | 10 | FEGVDFYKSI   |
| HSPA6 | KT 297 | rs41297718 | 0,02  | 0,06 | NRF | 10 | FEGVDFYTSI   |
| HSPA6 | KT 297 | rs41297718 | 0,02  | 0,06 | ARF | 11 | GLLHVHSCPL   |
| HSPA6 | KT 297 | rs41297718 | 0,02  | 0,06 | ARF | 11 | GLLQVHSCPL   |
| HSPA6 | KT 297 | rs41297718 | 0,02  | 0,06 | ARF | 10 | LLHVHSCPL    |
| HSPA6 | KT 297 | rs41297718 | 0,02  | 0,06 | ARF | 10 | LLQVHSCPL    |
| HSPA6 | KT 297 | rs41297718 | 0,02  | 0,06 | ARF | 9  | LQVHSCPL     |
| HSPA6 | KT 297 | rs41297718 | 0,02  | 0,06 | NRF | 10 | SLFEGVDFYK   |
| HSPA6 | KT 297 | rs41297718 | 0,02  | 0,06 | NRF | 10 | SLFEGVDFYT   |
| HSPA6 | KT 297 | rs41297718 | 0,02  | 0,06 | ARF | 9  | WTSTRPSLV    |
| HSPA6 | KT 297 | rs41297718 | 0,02  | 0,06 | ARF | 9  | WTSTRPSLV    |
| HSPA6 | VG 447 | rs450363   | 0,47  | 0,00 | NRF | 11 | FIQVYGERAM   |
| HSPA6 | VG 447 | rs450363   | 0,47  | 0,00 | NRF | 10 | FIQVYEVERA   |
| HSPA6 | VG 447 | rs450363   | 0,47  | 0,00 | NRF | 11 | FIQVYEVERAM  |
| HSPA6 | VG 447 | rs450363   | 0,47  | 0,00 | NRF | 9  | GVFIQVYEV    |
| HSPA6 | VG 447 | rs450363   | 0,47  | 0,00 | NRF | 10 | QVYEVERAMT   |
| HSPA6 | VG 447 | rs450363   | 0,47  | 0,00 | NRF | 10 | QVYEVERAMT   |
| HSPA6 | SI 464 | rs388218   | 0,08  | N.D. | ARF | 9  | FELIGIPPA    |
| HSPA6 | SI 464 | rs388218   | 0,08  | N.D. | ARF | 9  | FELSGIPPA    |
| HSPA6 | SI 464 | rs388218   | 0,08  | N.D. | ARF | 10 | LLGRFELIGI   |
| HSPA6 | SI 464 | rs388218   | 0,08  | N.D. | ARF | 10 | LLGRFELSGI   |
| HSPA6 | SI 464 | rs388218   | 0,08  | N.D. | ARF | 11 | NLLGRFELIGI  |
| HSPA6 | SI 464 | rs388218   | 0,08  | N.D. | ARF | 11 | NLLGRFELSGI  |

|        |         |            |       |      |     |    |             |
|--------|---------|------------|-------|------|-----|----|-------------|
| HSPA6  | SI 464  | rs388218   | 0,08  | N.D. | ARF | 9  | NLLGRFELI   |
| HSPA6  | SI 464  | rs388218   | 0,08  | N.D. | NRF | 9  | SLASLLPHV   |
| HSPA6  | SI 464  | rs388218   | 0,08  | N.D. | NRF | 9  | VLNSLASLL   |
| HSPA6  | SI 464  | rs388218   | 0,08  | N.D. | NRF | 9  | VLNSVASLL   |
| HSPA6  | HR 471  | rs41299256 | 0,06  | N.D. | NRF | 9  | GIPPAPHGV   |
| HSPA6  | HR 471  | rs41299256 | 0,06  | N.D. | NRF | 9  | GIPPAPRGV   |
| HSPA6  | HR 471  | rs41299256 | 0,06  | N.D. | ARF | 9  | SVASLLPHV   |
| HSPA6  | VM 527  | rs452004   | 0,04  | N.D. | ARF | 10 | KIPEEDRRKV  |
| HSPA6  | VM 527  | rs452004   | 0,04  | N.D. | NRF | 9  | KMQDKCREV   |
| HSPA6  | VM 527  | rs452004   | 0,04  | N.D. | NRF | 10 | KMQDKCREVL  |
| HSPA6  | VM 527  | rs452004   | 0,04  | N.D. | NRF | 9  | KVQDKCREV   |
| HSPA6  | VM 527  | rs452004   | 0,04  | N.D. | NRF | 10 | KVQDKCREVL  |
| HSPA6  | EK 528  | rs570189   | 0,02  | N.D. | NRF | 11 | RMVHEAEQYEA |
| HSPA6  | ED 562  | rs753856   | 0,24  | N.D. | NRF | 11 | SLQEESLRDKI |
| HSPA6  | ED 562  | rs753856   | 0,24  | N.D. | NRF | 10 | SLQEESLRK   |
| HSPA6  | ED 562  | rs753856   | 0,24  | N.D. | NRF | 9  | SLQEESLRKI  |
| HSPA6  | ED 562  | rs753856   | 0,24  | N.D. | NRF | 9  | SLRDKIPEE   |
| HSPA6  | ED 562  | rs753856   | 0,24  | N.D. | NRF | 9  | SLREKIPEE   |
| HSPA6  | QR 577  | rs368844   | 0,49  | 0,14 | NRF | 9  | KCQEVLAWL   |
| HSPA6  | QR 577  | rs368844   | 0,49  | 0,14 | NRF | 9  | KCREVLAWL   |
| HSPA6  | QR 577  | rs368844   | 0,49  | 0,14 | NRF | 9  | KMQDKCQEV   |
| HSPA6  | QR 577  | rs368844   | 0,49  | 0,14 | NRF | 10 | KMQDKCQEVL  |
| ICAM3  | AA 2    | rs281414   | 0,02  | 0,21 | ARF | 10 | ALCQNGHHGT  |
| ICAM3  | AA 2    | rs281414   | 0,02  | 0,21 | ARF | 11 | ALCQNGHHGTI |
| ICAM3  | AA 2    | rs281414   | 0,02  | 0,21 | ARF | 10 | ALCQNGYHGT  |
| ICAM3  | AA 2    | rs281414   | 0,02  | 0,21 | ARF | 11 | ALCQNGYHGTI |
| ICAM3  | AA 2    | rs281414   | 0,02  | 0,21 | ARF | 9  | SLSEWLPWY   |
| ICAM3  | AA 2    | rs281414   | 0,02  | 0,21 | ARF | 10 | SLSEWLPWYH  |
| ICAM3  | AA 2    | rs281414   | 0,02  | 0,21 | ARF | 10 | SLSEWPPWYH  |
| ICAM3  | VI 63   | rs17697947 | 0,044 | 0,00 | NRF | 11 | IALETSLSKEL |
| ICAM3  | VI 63   | rs17697947 | 0,044 | 0,00 | NRF | 11 | VALETSLSKEL |
| ICAM3  | SS 103  | rs2304240  | 0,27  | N.D. | ARF | 9  | LQWLPDNRL   |
| ICAM3  | SS 103  | rs2304240  | 0,27  | N.D. | ARF | 10 | LQWLPDNRL   |
| ICAM3  | SS 103  | rs2304240  | 0,27  | N.D. | ARF | 10 | LQWLPDNRL   |
| ICAM3  | SS 103  | rs2304240  | 0,27  | N.D. | ARF | 10 | LQWLPDNRL   |
| ICAM3  | SS 103  | rs2304240  | 0,27  | N.D. | ARF | 11 | SVLQWLPDNRL |
| ICAM3  | SS 103  | rs2304240  | 0,27  | N.D. | ARF | 11 | SVLQWLPDNRL |
| ICAM3  | SS 103  | rs2304240  | 0,27  | N.D. | ARF | 10 | VLQWLPDNRL  |
| ICAM3  | SS 103  | rs2304240  | 0,27  | N.D. | ARF | 10 | VLQWLPDNRL  |
| ICAM3  | GR 115  | rs7258015  | 0,26  | N.D. | NRF | 11 | GLPERVELAPL |
| ICAM3  | GR 115  | rs7258015  | 0,26  | N.D. | NRF | 9  | GLPERVELA   |
| ICAM3  | GR 115  | rs7258015  | 0,26  | N.D. | NRF | 10 | ITVYGLPERV  |
| ICAM3  | GR 115  | rs7258015  | 0,26  | N.D. | NRF | 10 | ITVYRLPERV  |
| ICAM3  | GR 115  | rs7258015  | 0,26  | N.D. | NRF | 9  | RLPERVELA   |
| ICAM3  | GR 115  | rs7258015  | 0,26  | N.D. | NRF | 11 | SNPERVELAPL |
| ICAM3  | GR 115  | rs7258015  | 0,26  | N.D. | NRF | 9  | SSNITVYGL   |
| ICAM3  | GR 115  | rs7258015  | 0,26  | N.D. | NRF | 9  | TVYGLPERV   |
| ICAM3  | GR 115  | rs7258015  | 0,26  | N.D. | NRF | 9  | TVYRLPERV   |
| ICAM3  | GR 115  | rs7258015  | 0,26  | N.D. | NRF | 9  | YGLPERVEL   |
| ICAM3  | GR 115  | rs7258015  | 0,26  | N.D. | NRF | 9  | YRLPERVEL   |
| ICAM3  | GD 143  | rs2304237  | 0,29  | 0,00 | ARF | 9  | SPCAAKWRV   |
| ICAM3  | GD 143  | rs2304237  | 0,29  | 0,00 | ARF | 10 | TSPCAAKWRV  |
| ICAM3  | ST 525  | rs2230399  | 0,19  | 0,13 | NRF | 11 | HVREESTYLPL |
| ICAM3  | ST 525  | rs2230399  | 0,19  | 0,13 | NRF | 11 | HVREETTYLPL |
| ICAM3  | ST 525  | rs2230399  | 0,19  | 0,13 | ARF | 9  | TMLGRRAPI   |
| ICAM3  | ST 525  | rs2230399  | 0,19  | 0,13 | ARF | 9  | TMLGRRPPI   |
| IL2RG  | EK 109  | rs17875899 | 0,02  | 0,00 | NRF | 10 | YLFSEIITSG  |
| IL2RG  | EK 109  | rs17875899 | 0,02  | 0,00 | NRF | 10 | YLFSEIITSG  |
| IQGAP2 | LL 154  | rs10036913 | 0,46  | 0,44 | ARF | 9  | ILHSRTEFI   |
| IQGAP2 | LL 154  | rs10036913 | 0,46  | 0,44 | ARF | 11 | ILHSRTEFISV |
| IQGAP2 | LL 154  | rs10036913 | 0,46  | 0,44 | ARF | 9  | ILHSRTEFV   |
| IQGAP2 | LL 154  | rs10036913 | 0,46  | 0,44 | ARF | 11 | ILHSRTEFVSV |
| IQGAP2 | AA 524  | rs2431351  | 0,5   | 0,42 | ARF | 9  | FGWMRYSKL   |
| IQGAP2 | AA 524  | rs2431351  | 0,499 | 0,42 | ARF | 9  | KLSMRPTWT   |
| IQGAP2 | DE 527  | rs2431352  | 0,14  | N.D. | NRF | 11 | EIQQAVDDANV |
| IQGAP2 | DE 527  | rs2431352  | 0,14  | N.D. | NRF | 11 | EIQQAVDEANV |
| IQGAP2 | DE 527  | rs2431352  | 0,14  | N.D. | NRF | 10 | IQQAVDDANV  |
| IQGAP2 | DE 527  | rs2431352  | 0,14  | N.D. | NRF | 10 | IQQAVDEANV  |
| IQGAP2 | DE 527  | rs2431352  | 0,14  | N.D. | NRF | 9  | QQAVDDANV   |
| IQGAP2 | DE 527  | rs2431352  | 0,14  | N.D. | NRF | 9  | QQAVDEANV   |
| IQGAP2 | DE 527  | rs2431352  | 0,14  | N.D. | ARF | 9  | SMPTWTRT    |
| IQGAP2 | DD 597  | rs2910819  | 0,5   | 0,40 | ARF | 11 | CLVMVHGSNST |
| IQGAP2 | DD 597  | rs2910819  | 0,5   | 0,40 | ARF | 11 | CLVTVHGSNST |
| IQGAP2 | DD 597  | rs2910819  | 0,5   | 0,40 | ARF | 10 | LVMVHGSNST  |
| IQGAP2 | DD 597  | rs2910819  | 0,5   | 0,40 | ARF | 9  | VMVHGSNST   |
| IQGAP2 | FL 629  | rs2455230  | 0,5   | 0,40 | NRF | 9  | SCFYKESWL   |
| IQGAP2 | FL 629  | rs2455230  | 0,5   | 0,40 | NRF | 9  | SCLYKESWL   |
| IQGAP2 | VI 724  | rs2431363  | 0,48  | 0,42 | NRF | 9  | FIDNTDSIV   |
| IQGAP2 | VI 724  | rs2431363  | 0,48  | 0,42 | NRF | 11 | FIDNTDSIVKI |
| IQGAP2 | VI 724  | rs2431363  | 0,48  | 0,42 | NRF | 9  | FIDNTDSVV   |
| IQGAP2 | VI 724  | rs2431363  | 0,48  | 0,42 | NRF | 11 | FIDNTDSVVKI |
| IQGAP2 | VI 724  | rs2431363  | 0,48  | 0,42 | NRF | 11 | SIVKIQSWFRM |
| IQGAP2 | VI 724  | rs2431363  | 0,48  | 0,42 | NRF | 11 | SVVKIQSWFRM |
| IQGAP2 | WR 1379 | rs17681908 | 0,04  | 0,00 | NRF | 9  | KIQRNLRTL   |
| IQGAP2 | WR 1379 | rs17681908 | 0,04  | 0,00 | NRF | 9  | KIQRNLWTL   |
| IQGAP2 | WR 1379 | rs17681908 | 0,04  | 0,00 | NRF | 11 | NLRTLEQTGHV |
| IQGAP2 | WR 1379 | rs17681908 | 0,04  | 0,00 | NRF | 11 | NLWLEQTGHV  |
| IQGAP2 | WR 1379 | rs17681908 | 0,04  | 0,00 | NRF | 9  | RTLEQTGHV   |

|        |         |            |      |      |     |    |              |
|--------|---------|------------|------|------|-----|----|--------------|
| IQGAP2 | WR 1379 | rs17681908 | 0,04 | 0,00 | NRF | 9  | WTLEQ TGHV   |
| ITGAL  | RT 791  | rs2230433  | 0,49 | 0,22 | NRF | 11 | RALRLTAFASL  |
| ITGAL  | RT 791  | rs2230433  | 0,49 | 0,22 | NRF | 11 | TALRLTAFASL  |
| ITGAL  | PP 1152 | rs11574950 | 0,05 | N.D. | ARF | 9  | HLGKRLGIL    |
| ITGAM  | RH 77   | rs1143679  | 0,08 | 0,15 | NRF | 9  | HLQVPVEAV    |
| ITGAM  | RH 77   | rs1143679  | 0,08 | 0,15 | NRF | 11 | HLQVPVEAVNM  |
| ITGAM  | RH 77   | rs1143679  | 0,08 | 0,15 | NRF | 10 | IHLQVPVEAV   |
| ITGAM  | RH 77   | rs1143679  | 0,08 | 0,15 | NRF | 10 | IRLQVPVEAV   |
| ITGAM  | RH 77   | rs1143679  | 0,08 | 0,15 | NRF | 9  | RLQVPVEAV    |
| ITGAM  | RH 77   | rs1143679  | 0,08 | 0,15 | NRF | 11 | RLQVPVEAVNM  |
| ITGAM  | RS 343  | rs3087444  | 0,02 | 0,00 | ARF | 11 | EVAAPLSMRCL  |
| ITGAM  | RS 343  | rs3087444  | 0,02 | 0,00 | ARF | 11 | RVLRQEVAAPL  |
| ITGAM  | RS 343  | rs3087444  | 0,02 | 0,00 | ARF | 11 | RVLRQEV EAPL |
| ITGAM  | RS 343  | rs3087444  | 0,02 | 0,00 | ARF | 10 | VAAPLSMRCL   |
| ITGAM  | RS 343  | rs3087444  | 0,02 | 0,00 | ARF | 10 | VLRQEVAAPL   |
| ITGAM  | RS 343  | rs3087444  | 0,02 | 0,00 | ARF | 10 | VLRQEV EAPL  |
| ITGAM  | MT 441  | rs11861251 | 0,2  | 0,16 | NRF | 9  | AMFRQNTGM    |
| ITGAM  | MT 441  | rs11861251 | 0,2  | 0,16 | NRF | 9  | AMFRQNTGT    |
| ITGAM  | MT 441  | rs11861251 | 0,2  | 0,16 | NRF | 9  | GMWESNANV    |
| ITGAM  | MT 441  | rs11861251 | 0,2  | 0,16 | NRF | 9  | GTWESNANV    |
| ITGAM  | SP 1146 | rs1143678  | 0,42 | 0,17 | NRF | 10 | MMSEGGPPGA   |
| ITGAM  | SP 1146 | rs1143678  | 0,42 | 0,17 | NRF | 10 | MMSEGGSPGA   |
| ITGB2  | GG 273  | rs2230528  | 0,25 | N.D. | ARF | 10 | SISRATESWA   |
| ITGB2  | GG 273  | rs2230528  | 0,25 | N.D. | ARF | 10 | SISRATG SWA  |
| ITGB2  | VV 367  | rs2230529  | 0,23 | 0,23 | ARF | 11 | TINSPPGSSWI  |
| ITGB2  | VV 367  | rs2230529  | 0,23 | 0,23 | ARF | 11 | TINSPPGYSWI  |
| ITGB2  | WR 586  | rs5030672  | N.D. | 0,01 | NRF | 10 | TEGCLNPWRV   |
| KCNAB2 | EK 88   | rs2229003  | 0,5  | N.D. | ARF | 10 | GINLFDTA EV  |
| KCNAB2 | EK 88   | rs2229003  | 0,5  | N.D. | ARF | 10 | GINLFDTAKV   |
| KCNAB2 | EK 88   | rs2229003  | 0,5  | N.D. | ARF | 9  | INLFDTA EV   |
| KCNAB2 | EK 88   | rs2229003  | 0,5  | N.D. | ARF | 9  | INLFDTAKV    |
| KCNAB2 | EK 88   | rs2229003  | 0,5  | N.D. | ARF | 10 | KVYAAGKAEV   |
| KCNAB2 | EK 88   | rs2229003  | 0,5  | N.D. | ARF | 10 | NLFDTA EVYA  |
| KCNAB2 | EK 88   | rs2229003  | 0,5  | N.D. | ARF | 11 | NLFDTA EVYAA |
| KCNAB2 | EK 88   | rs2229003  | 0,5  | N.D. | ARF | 10 | NLFDTAKVYA   |
| KCNAB2 | EK 88   | rs2229003  | 0,5  | N.D. | ARF | 11 | NLFDTAKVYAA  |
| KCNAB2 | AA 92   | rs2229004  | 0,14 | 0,00 | ARF | 9  | QLARLKWYW    |
| KCNAB2 | AA 92   | rs2229004  | 0,14 | 0,00 | ARF | 11 | SIQQKSTQLAR  |
| KCNAB2 | AA 92   | rs2229004  | 0,14 | 0,00 | ARF | 9  | SIQQKSTQL    |
| KCNAB2 | AA 92   | rs2229004  | 0,14 | 0,00 | ARF | 11 | SSIQQKSTQLA  |
| KCNAB2 | GG 122  | rs2229005  | 0,05 | 0,00 | ARF | 10 | LLGRKGGDGA   |
| KCNAB2 | GG 122  | rs2229005  | 0,05 | 0,00 | ARF | 10 | LLGWKGGDGA   |
| KCNAB2 | SS 344  | rs2229002  | 0,49 | 0,35 | ARF | 9  | HLPLSTRLI    |
| KCNAB2 | SS 344  | rs2229002  | 0,49 | 0,35 | ARF | 10 | HLPLSTRLIV   |
| KCNAB2 | SS 344  | rs2229002  | 0,49 | 0,35 | ARF | 9  | RLPLSTRLI    |
| KCNAB2 | SS 344  | rs2229002  | 0,49 | 0,35 | ARF | 10 | RLPLSTRLIV   |
| LCP2   | QQ 326  | rs315717   | 0,49 | 0,48 | ARF | 10 | MMKMMCIKDL   |
| LCP2   | QQ 326  | rs315717   | 0,49 | 0,48 | ARF | 10 | MMKMMCI RDL  |
| LRMP   | GE 25   | rs1129442  | N.D. | 0,00 | NRF | 10 | LLQSR EYSSL  |
| LRMP   | GE 25   | rs1129442  | N.D. | 0,00 | NRF | 10 | LLQSRGYSSL   |
| LRMP   | GE 25   | rs1129442  | N.D. | 0,00 | NRF | 9  | LQSR EYSSL   |
| LRMP   | GE 25   | rs1129442  | N.D. | 0,00 | NRF | 9  | LQSRGYSSL    |
| LRMP   | GE 25   | rs1129442  | N.D. | 0,00 | NRF | 11 | SLLQSR EYSSL |
| LRMP   | GE 25   | rs1129442  | N.D. | 0,00 | NRF | 11 | SLLQSRGYSSL  |
| LRMP   | SC 197  | rs1908946  | 0,5  | N.D. | NRF | 9  | NLKLLESL     |
| LRMP   | SC 197  | rs1908946  | 0,5  | N.D. | NRF | 10 | NLKKEITNCL   |
| LRMP   | SC 197  | rs1908946  | 0,5  | N.D. | NRF | 10 | NLKKEITNSL   |
| LRMP   | SC 197  | rs1908946  | 0,5  | N.D. | NRF | 9  | NLKLLESL     |
| LRMP   | SC 197  | rs1908946  | 0,5  | N.D. | NRF | 11 | SLKLLESLTPI  |
| LRMP   | FS 322  | rs1129443  | N.D. | 0,00 | NRF | 9  | FLPRNIGNA    |
| LRMP   | FS 322  | rs1129443  | N.D. | 0,00 | NRF | 11 | FLPRNIGNAGM  |
| LRMP   | FS 322  | rs1129443  | N.D. | 0,00 | NRF | 9  | LRRVTIASL    |
| LRMP   | FS 322  | rs1129443  | N.D. | 0,00 | NRF | 11 | SSLRRVTIAFL  |
| LRMP   | FS 322  | rs1129443  | N.D. | 0,00 | NRF | 11 | SSLRRVTIASL  |
| LRMP   | FS 322  | rs1129443  | N.D. | 0,00 | NRF | 9  | SLPRNIGNA    |
| LRMP   | FS 322  | rs1129443  | N.D. | 0,00 | NRF | 11 | SLPRNIGNAGM  |
| LRMP   | FS 322  | rs1129443  | N.D. | 0,00 | NRF | 10 | SLRRVTIAFL   |
| LRMP   | FS 322  | rs1129443  | N.D. | 0,00 | NRF | 10 | SLRRVTIASL   |
| LRMP   | FS 322  | rs1129443  | N.D. | 0,00 | NRF | 9  | TIASLPRNI    |
| LTB    | GA 69   | rs4647186  | 0,01 | 0,04 | NRF | 9  | DLRPGLPAA    |
| LTB    | GA 69   | rs4647186  | 0,01 | 0,04 | ARF | 10 | KQISAPGSQL   |
| LTB    | GA 69   | rs4647186  | 0,01 | 0,04 | ARF | 10 | KQISGPGSQL   |
| LTB    | GA 69   | rs4647186  | 0,01 | 0,04 | ARF | 9  | KQISAPGSQL   |
| LTB    | GA 69   | rs4647186  | 0,01 | 0,04 | ARF | 9  | QISGPGSQL    |
| LTB    | RS 84   | rs4647186  | 0,01 | 0,04 | NRF | 9  | DLSPGLPAA    |
| LTB    | TT 117  | rs2229698  | 0,4  | 0,00 | ARF | 9  | GVSDERDAV    |
| LTB    | TT 117  | rs2229698  | 0,4  | 0,00 | ARF | 10 | GVSDERDAVL   |
| LTB    | TT 117  | rs2229698  | 0,4  | 0,00 | ARF | 9  | GVSDERDSV    |
| LTB    | TT 117  | rs2229698  | 0,4  | 0,00 | ARF | 10 | GVSDERDSVL   |
| LTB    | DA 122  | rs2229699  | 0,17 | N.D. | NRF | 11 | FLTSGTQFSDA  |
| LTB    | DA 122  | rs2229699  | 0,17 | N.D. | NRF | 9  | TQFSDA EGL   |
| LTB    | DA 122  | rs2229699  | 0,17 | N.D. | NRF | 9  | TQFSD DEGL   |
| LTB    | FF 231  | rs4248165  | 0,01 | 0,01 | ARF | 9  | GLCEREDLL    |
| LTB    | FF 231  | rs4248165  | 0,01 | 0,01 | ARF | 9  | GLREREDLL    |
| LTB    | FF 231  | rs4248165  | 0,01 | 0,01 | ARF | 9  | SVTPIWWT L   |
| LTB    | FF 231  | rs4248165  | 0,01 | 0,01 | ARF | 9  | TLREGRPSL    |
| LTB    | FF 231  | rs4248165  | 0,01 | 0,01 | ARF | 10 | WTLREGRPSL   |
| LYN    | KK 233  | rs2227980  | 0,22 | 0,03 | ARF | 10 | VLVPSHRSHGI  |

|         |        |            |      |      |     |    |                                                                        |
|---------|--------|------------|------|------|-----|----|------------------------------------------------------------------------|
| LYN     | KK 233 | rs2227980  | 0,22 | 0,03 | ARF | 11 | VLVPSHR <b>S</b> HGI                                                   |
| LYN     | II 358 | rs7001291  | N.D. | 0,00 | ARF | 9  | RLQRE <b>W</b> HTL                                                     |
| LYN     | II 358 | rs7001291  | N.D. | 0,00 | ARF | 9  | T <b>L</b> SGRTTFT                                                     |
| LYN     | II 379 | rs1050875  | N.D. | 0,00 | ARF | 11 | LMFWSPSH <b>S</b> CA                                                   |
| LYN     | II 379 | rs1050875  | N.D. | 0,00 | ARF | 10 | <b>S</b> CAKLQILAL                                                     |
| MAP4K1  | MT 204 | rs17847696 | N.D. | 0,00 | NRF | 10 | DIW <b>S</b> LGIMAI                                                    |
| MAP4K1  | MT 204 | rs17847696 | N.D. | 0,00 | NRF | 10 | DIW <b>S</b> LGITAI                                                    |
| MAP4K1  | MT 204 | rs17847696 | N.D. | 0,00 | NRF | 10 | GIMAI <b>E</b> LAEL                                                    |
| MAP4K1  | MT 204 | rs17847696 | N.D. | 0,00 | NRF | 10 | GITAI <b>E</b> LAEL                                                    |
| MAP4K1  | MT 204 | rs17847696 | N.D. | 0,00 | NRF | 9  | IMAI <b>E</b> LAEL                                                     |
| MAP4K1  | MT 204 | rs17847696 | N.D. | 0,00 | NRF | 9  | ITAI <b>E</b> LAEL                                                     |
| MAP4K1  | MT 204 | rs17847696 | N.D. | 0,00 | NRF | 9  | SLGIMAI <b>E</b> L                                                     |
| MAP4K1  | MT 204 | rs17847696 | N.D. | 0,00 | NRF | 10 | SLGIMAI <b>E</b> LA                                                    |
| MAP4K1  | MT 204 | rs17847696 | N.D. | 0,00 | NRF | 9  | SLGITAI <b>E</b> L                                                     |
| MAP4K1  | MT 204 | rs17847696 | N.D. | 0,00 | NRF | 10 | SLGITAI <b>E</b> LA                                                    |
| MCM5    | ST 180 | rs2307340  | 0,08 | 0,17 | ARF | 11 | AAAAATPS <b>A</b> TL                                                   |
| MCM5    | ST 180 | rs2307340  | 0,08 | 0,17 | ARF | 10 | AAAATPS <b>A</b> TL                                                    |
| MCM5    | ST 180 | rs2307340  | 0,08 | 0,17 | ARF | 10 | AAAATPS <b>P</b> TL                                                    |
| MCM5    | ST 180 | rs2307340  | 0,08 | 0,17 | ARF | 9  | AAATPS <b>A</b> TL                                                     |
| MCM5    | ST 180 | rs2307340  | 0,08 | 0,17 | ARF | 9  | AAATPS <b>P</b> TL                                                     |
| MCM5    | ST 180 | rs2307340  | 0,08 | 0,17 | NRF | 10 | L <b>T</b> NIAMR <b>P</b> GL                                           |
| MCM5    | ST 180 | rs2307340  | 0,08 | 0,17 | NRF | 11 | TL <b>S</b> NIAMR <b>P</b> GL                                          |
| MCM5    | ST 180 | rs2307340  | 0,08 | 0,17 | NRF | 11 | TL <b>T</b> NIAMR <b>P</b> GL                                          |
| MCM5    | LL 188 | rs2230932  | 0,04 | N.D. | ARF | 10 | TLPCAL <b>A</b> LRA                                                    |
| MCM5    | LL 188 | rs2230932  | 0,04 | N.D. | ARF | 10 | TLPCAL <b>A</b> SRA                                                    |
| MCM5    | VI 258 | rs2230933  | 0,03 | 0,00 | NRF | 10 | KV <b>I</b> P <b>G</b> NRVTI                                           |
| MCM5    | VI 258 | rs2230933  | 0,03 | 0,00 | NRF | 10 | KV <b>V</b> P <b>G</b> NRVTI                                           |
| MCM5    | VI 258 | rs2230933  | 0,03 | 0,00 | NRF | 9  | V <b>I</b> P <b>G</b> NRVTI                                            |
| MCM5    | VI 258 | rs2230933  | 0,03 | 0,00 | NRF | 9  | V <b>V</b> P <b>G</b> NRVTI                                            |
| MCM5    | VI 258 | rs2230933  | 0,03 | 0,00 | NRF | 9  | Y <b>L</b> CDK <b>V</b> I <b>P</b> G                                   |
| MCM5    | VI 258 | rs2230933  | 0,03 | 0,00 | NRF | 10 | Y <b>L</b> CDK <b>V</b> I <b>P</b> GN                                  |
| MCM5    | VI 258 | rs2230933  | 0,03 | 0,00 | NRF | 9  | Y <b>L</b> CDK <b>V</b> <b>V</b> P <b>G</b>                            |
| MCM5    | VI 258 | rs2230933  | 0,03 | 0,00 | NRF | 10 | Y <b>L</b> CDK <b>V</b> <b>V</b> P <b>G</b> N                          |
| MCM5    | KK 569 | rs133427   | 0,19 | N.D. | ARF | 10 | LLP <b>S</b> <b>E</b> <b>M</b> W <b>P</b> PA                           |
| MCM5    | KK 569 | rs133427   | 0,19 | N.D. | ARF | 11 | LLP <b>S</b> <b>E</b> <b>M</b> W <b>P</b> PA <b>V</b>                  |
| MCM5    | KK 569 | rs133427   | 0,19 | N.D. | ARF | 10 | LLP <b>S</b> <b>E</b> <b>V</b> W <b>P</b> PA                           |
| MCM5    | KK 569 | rs133427   | 0,19 | N.D. | ARF | 11 | LLP <b>S</b> <b>E</b> <b>V</b> W <b>P</b> PA <b>V</b>                  |
| MPL     | KN 39  | rs17292650 | 0,04 | 0,00 | ARF | 9  | G <b>I</b> R <b>L</b> R <b>A</b> P <b>E</b> L                          |
| MPL     | KN 39  | rs17292650 | 0,04 | 0,00 | ARF | 9  | G <b>I</b> R <b>L</b> R <b>A</b> P <b>E</b> <b>V</b>                   |
| MPL     | KN 39  | rs17292650 | 0,04 | 0,00 | ARF | 9  | R <b>L</b> R <b>A</b> P <b>E</b> <b>L</b> <b>F</b> L                   |
| MPL     | KN 39  | rs17292650 | 0,04 | 0,00 | ARF | 9  | R <b>L</b> R <b>A</b> P <b>E</b> <b>V</b> <b>F</b> L                   |
| MPL     | KN 39  | rs17292650 | 0,04 | 0,00 | NRF | 11 | S <b>L</b> L <b>A</b> S <b>D</b> S <b>E</b> P <b>L</b> <b>K</b>        |
| MPL     | KN 39  | rs17292650 | 0,04 | 0,00 | NRF | 11 | S <b>L</b> L <b>A</b> S <b>D</b> S <b>E</b> P <b>L</b> <b>N</b>        |
| MPL     | PP 70  | rs6086     | N.D. | 0,00 | ARF | 10 | C <b>M</b> P <b>T</b> <b>H</b> G <b>R</b> S <b>P</b> V                 |
| MPL     | PP 70  | rs6086     | N.D. | 0,00 | ARF | 10 | C <b>M</b> P <b>T</b> <b>R</b> G <b>R</b> S <b>P</b> V                 |
| MPL     | PP 70  | rs6086     | N.D. | 0,00 | ARF | 10 | C <b>L</b> P <b>A</b> G <b>E</b> A <b>P</b> C <b>L</b>                 |
| MPL     | PP 70  | rs6086     | N.D. | 0,00 | ARF | 10 | C <b>L</b> P <b>T</b> G <b>E</b> A <b>P</b> C <b>L</b>                 |
| MPL     | VM 114 | rs12731981 | 0,03 | 0,03 | NRF | 10 | F <b>P</b> L <b>H</b> L <b>V</b> W <b>K</b> N <b>V</b>                 |
| MPL     | VM 114 | rs12731981 | 0,03 | 0,03 | NRF | 9  | H <b>L</b> W <b>V</b> K <b>N</b> <b>M</b> <b>F</b> L                   |
| MPL     | VM 114 | rs12731981 | 0,03 | 0,03 | NRF | 9  | H <b>L</b> W <b>V</b> K <b>N</b> <b>V</b> <b>F</b> L                   |
| MPL     | VM 114 | rs12731981 | 0,03 | 0,03 | NRF | 9  | <b>N</b> <b>M</b> <b>F</b> L <b>N</b> Q <b>T</b> R <b>T</b>            |
| MPL     | VM 114 | rs12731981 | 0,03 | 0,03 | NRF | 9  | P <b>L</b> H <b>L</b> W <b>V</b> K <b>N</b> <b>V</b>                   |
| MPL     | VM 114 | rs12731981 | 0,03 | 0,03 | ARF | 10 | S <b>A</b> A <b>P</b> L <b>G</b> E <b>E</b> <b>C</b> <b>V</b>          |
| MPL     | VM 114 | rs12731981 | 0,03 | 0,03 | ARF | 10 | S <b>A</b> A <b>P</b> L <b>G</b> E <b>E</b> <b>Y</b> <b>V</b>          |
| MPL     | EE 230 | rs16830693 | 0,13 | 0,01 | ARF | 9  | S <b>R</b> P <b>P</b> Q <b>V</b> E <b>K</b> L                          |
| MPL     | TP 275 | rs28928908 | N.D. | 0,00 | NRF | 10 | G <b>S</b> W <b>G</b> S <b>W</b> S <b>L</b> <b>P</b> <b>V</b>          |
| MPL     | TP 275 | rs28928908 | N.D. | 0,00 | NRF | 10 | G <b>S</b> W <b>G</b> S <b>W</b> S <b>L</b> <b>T</b> <b>V</b>          |
| MPL     | TP 275 | rs28928908 | N.D. | 0,00 | ARF | 9  | G <b>S</b> W <b>S</b> L <b>T</b> <b>V</b> <b>T</b> <b>V</b>            |
| MPL     | TP 275 | rs28928908 | N.D. | 0,00 | ARF | 9  | W <b>L</b> L <b>G</b> I <b>L</b> <b>V</b> <b>P</b> <b>H</b>            |
| N4BP2L1 | IL 141 | rs1062947  | N.D. | 0,00 | NRF | 9  | A <b>L</b> E <b>N</b> N <b>Y</b> E <b>V</b> I                          |
| N4BP2L1 | IL 141 | rs1062947  | N.D. | 0,00 | NRF | 9  | A <b>L</b> E <b>N</b> N <b>Y</b> E <b>V</b> L                          |
| N4BP2L1 | IL 141 | rs1062947  | N.D. | 0,00 | NRF | 11 | V <b>M</b> A <b>L</b> E <b>N</b> N <b>Y</b> E <b>V</b> I               |
| N4BP2L1 | IL 141 | rs1062947  | N.D. | 0,00 | NRF | 11 | V <b>M</b> A <b>L</b> E <b>N</b> N <b>Y</b> E <b>V</b> L               |
| NCF4    | SS 23  | rs10854695 | 0,23 | 0,01 | ARF | 10 | M <b>M</b> L <b>P</b> S <b>Q</b> P <b>T</b> L <b>L</b>                 |
| NCF4    | SS 23  | rs10854695 | 0,23 | 0,01 | ARF | 11 | M <b>M</b> L <b>P</b> S <b>Q</b> P <b>T</b> L <b>L</b> T               |
| NCF4    | SS 23  | rs10854695 | 0,23 | 0,01 | ARF | 10 | M <b>M</b> L <b>P</b> S <b>R</b> P <b>T</b> L <b>L</b>                 |
| NCF4    | SS 23  | rs10854695 | 0,23 | 0,01 | ARF | 11 | M <b>M</b> L <b>P</b> S <b>R</b> P <b>T</b> L <b>L</b> T               |
| NCF4    | SS 23  | rs10854695 | 0,23 | 0,01 | ARF | 9  | M <b>L</b> P <b>S</b> <b>Q</b> P <b>T</b> L <b>L</b>                   |
| NCF4    | SS 23  | rs10854695 | 0,23 | 0,01 | ARF | 10 | M <b>L</b> P <b>S</b> <b>Q</b> P <b>T</b> L <b>L</b> T                 |
| NCF4    | SS 23  | rs10854695 | 0,23 | 0,01 | ARF | 9  | M <b>L</b> P <b>S</b> <b>R</b> P <b>T</b> L <b>L</b>                   |
| NCF4    | SS 23  | rs10854695 | 0,23 | 0,01 | ARF | 10 | M <b>L</b> P <b>S</b> <b>R</b> P <b>T</b> L <b>L</b> T                 |
| NCF4    | SS 23  | rs10854695 | 0,23 | 0,01 | ARF | 9  | M <b>M</b> L <b>P</b> S <b>Q</b> P <b>T</b> L                          |
| NCF4    | SS 23  | rs10854695 | 0,23 | 0,01 | ARF | 9  | M <b>M</b> L <b>P</b> S <b>R</b> P <b>T</b> L                          |
| NCF4    | SS 23  | rs10854695 | 0,23 | 0,01 | ARF | 10 | R <b>M</b> M <b>L</b> P <b>S</b> <b>Q</b> P <b>T</b> L                 |
| NCF4    | SS 23  | rs10854695 | 0,23 | 0,01 | ARF | 10 | R <b>M</b> M <b>L</b> P <b>S</b> <b>R</b> P <b>T</b> L                 |
| NCF4    | SN 118 | rs9610595  | N.D. | 0,00 | NRF | 11 | A <b>Y</b> M <b>K</b> S <b>L</b> L <b>N</b> L <b>P</b> <b>V</b>        |
| NCF4    | SN 118 | rs9610595  | N.D. | 0,00 | NRF | 9  | A <b>Y</b> M <b>K</b> S <b>L</b> L <b>S</b> L                          |
| NCF4    | SN 118 | rs9610595  | N.D. | 0,00 | NRF | 11 | A <b>Y</b> M <b>K</b> S <b>L</b> L <b>S</b> L <b>P</b> <b>V</b>        |
| NCF4    | SN 118 | rs9610595  | N.D. | 0,00 | NRF | 9  | L <b>L</b> <b>N</b> L <b>P</b> <b>V</b> <b>V</b> <b>V</b> L            |
| NCF4    | SN 118 | rs9610595  | N.D. | 0,00 | NRF | 10 | L <b>L</b> <b>N</b> L <b>P</b> <b>V</b> <b>V</b> <b>V</b> L <b>M</b>   |
| NCF4    | SN 118 | rs9610595  | N.D. | 0,00 | NRF | 9  | L <b>L</b> <b>S</b> L <b>P</b> <b>V</b> <b>V</b> <b>V</b> L            |
| NCF4    | SN 118 | rs9610595  | N.D. | 0,00 | NRF | 10 | L <b>L</b> <b>S</b> L <b>P</b> <b>V</b> <b>V</b> <b>V</b> L <b>M</b>   |
| NCF4    | SN 118 | rs9610595  | N.D. | 0,00 | NRF | 10 | N <b>A</b> Y <b>M</b> K <b>S</b> L <b>L</b> <b>N</b> L                 |
| NCF4    | SN 118 | rs9610595  | N.D. | 0,00 | NRF | 10 | N <b>A</b> Y <b>M</b> K <b>S</b> L <b>L</b> <b>S</b> L                 |
| NCF4    | SN 118 | rs9610595  | N.D. | 0,00 | NRF | 10 | S <b>L</b> L <b>N</b> L <b>P</b> <b>V</b> <b>V</b> <b>V</b> L          |
| NCF4    | SN 118 | rs9610595  | N.D. | 0,00 | NRF | 11 | S <b>L</b> L <b>N</b> L <b>P</b> <b>V</b> <b>V</b> <b>V</b> L <b>M</b> |
| NCF4    | SN 118 | rs9610595  | N.D. | 0,00 | NRF | 10 | S <b>L</b> L <b>S</b> L <b>P</b> <b>V</b> <b>V</b> <b>V</b> L          |
| NCF4    | SN 118 | rs9610595  | N.D. | 0,00 | NRF | 11 | S <b>L</b> L <b>S</b> L <b>P</b> <b>V</b> <b>V</b> <b>V</b> L <b>M</b> |



|        |         |            |      |      |     |    |             |
|--------|---------|------------|------|------|-----|----|-------------|
| NCF4   | SN 118  | rs9610595  | N.D. | 0,00 | NRF | 9  | SLLNLPVWV   |
| NCF4   | SN 118  | rs9610595  | N.D. | 0,00 | NRF | 9  | SLLSLPVWV   |
| NCF4   | SN 118  | rs9610595  | N.D. | 0,00 | NRF | 10 | VSLLNLPVWV  |
| NCF4   | SN 118  | rs9610595  | N.D. | 0,00 | NRF | 10 | VSLLSLPVWV  |
| NCF4   | SN 118  | rs9610595  | N.D. | 0,00 | NRF | 10 | YMKSLNLPV   |
| NCF4   | SN 118  | rs9610595  | N.D. | 0,00 | NRF | 10 | YMKSLSLPV   |
| NCF4   | SS 299  | rs11552115 | 0,26 | N.D. | ARF | 9  | GIWFGCCQM   |
| NCF4   | SS 299  | rs11552115 | 0,26 | N.D. | ARF | 9  | GIWFGCCRM   |
| NCF4   | EA 304  | rs5995361  | N.D. | 0,00 | NRF | 10 | ALMVRQARGL  |
| NCF4   | EA 304  | rs5995361  | N.D. | 0,00 | NRF | 10 | ELMVRQARGL  |
| NCF4   | EA 304  | rs5995361  | N.D. | 0,00 | NRF | 9  | LLSDEDVAL   |
| NCF4   | EA 304  | rs5995361  | N.D. | 0,00 | NRF | 10 | LLSDEDVALM  |
| NCF4   | EA 304  | rs5995361  | N.D. | 0,00 | NRF | 11 | LLSDEDVALMV |
| NCF4   | EA 304  | rs5995361  | N.D. | 0,00 | NRF | 9  | LLSDEDVEL   |
| NCF4   | EA 304  | rs5995361  | N.D. | 0,00 | NRF | 10 | LLSDEDVELM  |
| NCF4   | EA 304  | rs5995361  | N.D. | 0,00 | NRF | 11 | LLSDEDVELMV |
| NCF4   | EA 304  | rs5995361  | N.D. | 0,00 | NRF | 10 | RLLSDEDVAL  |
| NCF4   | EA 304  | rs5995361  | N.D. | 0,00 | NRF | 11 | RLLSDEDVALM |
| NCF4   | EA 304  | rs5995361  | N.D. | 0,00 | NRF | 10 | RLLSDEDVEL  |
| NCF4   | EA 304  | rs5995361  | N.D. | 0,00 | NRF | 11 | RLLSDEDVELM |
| NCF4   | FF 320  | rs1858     | 0,11 | N.D. | ARF | 9  | PLPEAPLPL   |
| NCF4   | FF 320  | rs1858     | 0,11 | N.D. | ARF | 9  | PLPEAPLSL   |
| NCF4   | TT 337  | rs28669668 | 0,09 | 0,00 | ARF | 9  | QLQGLQHD    |
| NCF4   | TT 337  | rs28669668 | 0,09 | 0,00 | ARF | 9  | QLQGLQHNA   |
| NCF4   | TT 337  | rs28669668 | 0,09 | 0,00 | ARF | 9  | QCHELTVSL   |
| NCF4   | TT 337  | rs28669668 | 0,09 | 0,00 | ARF | 9  | RCHELTVSL   |
| NUP210 | VA 755  | rs6795271  | 0,31 | 0,38 | ARF | 10 | CLSTPAPSWT  |
| NUP210 | VA 755  | rs6795271  | 0,31 | 0,38 | NRF | 10 | LVPVYTSPQL  |
| NUP210 | VA 755  | rs6795271  | 0,31 | 0,38 | ARF | 10 | RLSTPAPSWT  |
| NUP210 | VA 755  | rs6795271  | 0,31 | 0,38 | NRF | 11 | TLAPVYTSPQL |
| NUP210 | VA 755  | rs6795271  | 0,31 | 0,38 | NRF | 11 | TLVPVYTSPQL |
| NUP210 | LR 786  | rs2280084  | 0,47 | 0,39 | ARF | 11 | ATATPCWTWLL |
| NUP210 | LR 786  | rs2280084  | 0,47 | 0,39 | ARF | 11 | ATATPGWTWLL |
| NUP210 | LR 786  | rs2280084  | 0,47 | 0,39 | ARF | 9  | ATPCWTWLL   |
| NUP210 | LR 786  | rs2280084  | 0,47 | 0,39 | ARF | 9  | ATPGWTWLL   |
| NUP210 | AP 821  | rs2280085  | 0,36 | 0,16 | NRF | 10 | IEAELPMQLV  |
| NUP210 | AP 821  | rs2280085  | 0,36 | 0,16 | NRF | 10 | IEAELPMQLV  |
| NUP210 | AP 821  | rs2280085  | 0,36 | 0,16 | NRF | 10 | IEPELPMQLV  |
| NUP210 | AP 821  | rs2280085  | 0,36 | 0,16 | NRF | 10 | IEPELPMQLV  |
| NUP210 | AP 821  | rs2280085  | 0,36 | 0,16 | NRF | 10 | SIEAELPMQL  |
| NUP210 | AP 821  | rs2280085  | 0,36 | 0,16 | NRF | 10 | SIEPELPMQL  |
| NUP210 | AP 821  | rs2280085  | 0,36 | 0,16 | NRF | 11 | VLASIEAELPM |
| NUP210 | AP 821  | rs2280085  | 0,36 | 0,16 | NRF | 11 | VLASIEPELPM |
| NUP210 | AP 821  | rs2280085  | 0,36 | 0,16 | NRF | 9  | VLASIEAEL   |
| NUP210 | AP 821  | rs2280085  | 0,36 | 0,16 | NRF | 9  | VLASIEPEL   |
| NUP210 | PL 966  | rs2271503  | N.D. | 0,00 | NRF | 10 | CLVFLAPAKA  |
| NUP210 | PL 966  | rs2271503  | N.D. | 0,00 | NRF | 10 | CLVFPAPAKA  |
| NUP210 | PL 966  | rs2271503  | N.D. | 0,00 | NRF | 11 | CLVFPAPAKAV |
| NUP210 | PL 966  | rs2271503  | N.D. | 0,00 | NRF | 9  | DCLVFLAPA   |
| NUP210 | PL 966  | rs2271503  | N.D. | 0,00 | NRF | 9  | FLAPAKAVV   |
| NUP210 | PL 966  | rs2271503  | N.D. | 0,00 | NRF | 11 | FLAPAKAVVV  |
| NUP210 | PL 966  | rs2271503  | N.D. | 0,00 | NRF | 11 | IMIHDLCLVFL |
| NUP210 | PL 966  | rs2271503  | N.D. | 0,00 | NRF | 10 | LVFLAPAKAV  |
| NUP210 | PL 966  | rs2271503  | N.D. | 0,00 | NRF | 11 | LVFLAPAKAVV |
| NUP210 | PL 966  | rs2271503  | N.D. | 0,00 | NRF | 10 | LVFPAPAKAV  |
| NUP210 | PL 966  | rs2271503  | N.D. | 0,00 | NRF | 11 | LVFPAPAKAVV |
| NUP210 | PL 966  | rs2271503  | N.D. | 0,00 | NRF | 10 | LAPAKAVVV   |
| NUP210 | PL 966  | rs2271503  | N.D. | 0,00 | NRF | 11 | MIHDLCLVFLA |
| NUP210 | PL 966  | rs2271503  | N.D. | 0,00 | NRF | 10 | MIHDLCLVFL  |
| NUP210 | FF 1016 | rs2271504  | 0,47 | 0,39 | NRF | 9  | ILPLHGPEA   |
| NUP210 | FF 1016 | rs2271504  | 0,47 | 0,39 | NRF | 9  | ILPLYGPEA   |
| NUP210 | FF 1016 | rs2271504  | 0,47 | 0,39 | ARF | 11 | PLHGPEAPSSL |
| NUP210 | FF 1016 | rs2271504  | 0,47 | 0,39 | ARF | 11 | PLYGPEAPSSL |
| NUP210 | FF 1016 | rs2271504  | 0,47 | 0,39 | NRF | 10 | QILPLHGPEA  |
| NUP210 | FF 1016 | rs2271504  | 0,47 | 0,39 | NRF | 10 | QILPLYGPEA  |
| NUP210 | FF 1016 | rs2271504  | 0,47 | 0,39 | ARF | 10 | SLPNTSPLWT  |
| NUP210 | FF 1016 | rs2271504  | 0,47 | 0,39 | ARF | 10 | SLPNTSPSWT  |
| NUP210 | IM 1096 | rs2271505  | 0,01 | 0,00 | NRF | 9  | LLIGATIQV   |
| NUP210 | IM 1096 | rs2271505  | 0,01 | 0,00 | NRF | 10 | LLIGATIQVT  |
| NUP210 | IM 1096 | rs2271505  | 0,01 | 0,00 | NRF | 11 | LLIGATIQVTS |
| NUP210 | IM 1096 | rs2271505  | 0,01 | 0,00 | NRF | 9  | LLIGATMQV   |
| NUP210 | IM 1096 | rs2271505  | 0,01 | 0,00 | NRF | 10 | LLIGATMQVT  |
| NUP210 | IM 1096 | rs2271505  | 0,01 | 0,00 | NRF | 11 | LLIGATMQVTS |
| NUP210 | IM 1096 | rs2271505  | 0,01 | 0,00 | NRF | 10 | TLLIGATIQV  |
| NUP210 | IM 1096 | rs2271505  | 0,01 | 0,00 | NRF | 11 | TLLIGATIQVT |
| NUP210 | IM 1096 | rs2271505  | 0,01 | 0,00 | NRF | 10 | TLLIGATMQV  |
| NUP210 | IM 1096 | rs2271505  | 0,01 | 0,00 | NRF | 11 | TLLIGATMQVT |
| NUP210 | IM 1096 | rs2271505  | 0,01 | 0,00 | NRF | 9  | VTLLIGATI   |
| NUP210 | IM 1096 | rs2271505  | 0,01 | 0,00 | NRF | 11 | VTLLIGATIQV |
| NUP210 | IM 1096 | rs2271505  | 0,01 | 0,00 | NRF | 11 | VTLLIGATMQV |
| NUP210 | CC 1444 | rs2271509  | 0,5  | 0,46 | ARF | 9  | ALSAQSAWA   |
| NUP210 | CC 1444 | rs2271509  | 0,5  | 0,46 | ARF | 9  | RAPPTTPVL   |
| NUP210 | CC 1444 | rs2271509  | 0,5  | 0,46 | ARF | 9  | RAPPTTPAL   |
| NUP210 | CC 1444 | rs2271509  | 0,5  | 0,46 | ARF | 9  | VLSAQSAWA   |
| NUP210 | SL 1752 | rs354479   | 0,19 | N.D. | NRF | 9  | FITYTVGVL   |
| NUP210 | SL 1752 | rs354479   | 0,19 | N.D. | NRF | 9  | YTVGVLDPA   |
| NUP210 | MV 1787 | rs354478   | 0,5  | 0,46 | NRF | 10 | AIPVTVAFVV  |
| NUP210 | MV 1787 | rs354478   | 0,05 | 0,46 | ARF | 10 | LLWVIAVGPV  |

|         |        |            |       |      |     |    |                                                        |
|---------|--------|------------|-------|------|-----|----|--------------------------------------------------------|
| PIK3CD  | TT 226 | rs2230735  | 0,04  | 0,00 | ARF | 11 | GLCPAEEGHGV                                            |
| PIK3CD  | TT 226 | rs2230735  | 0,04  | 0,00 | ARF | 11 | GLCPAEEGH <b>S</b> V                                   |
| PIK3CD  | AA 345 | rs28730672 | N.D.  | 0,00 | ARF | 10 | WAFPRQRDAV                                             |
| PIK3CD  | CR 437 | rs28730673 | N.D.  | 0,01 | NRF | 9  | KTGE <b>C</b> CLYM                                     |
| PIK3CD  | CR 437 | rs28730673 | N.D.  | 0,01 | NRF | 9  | KTGE <b>R</b> CLYM                                     |
| PIK3CD  | CR 437 | rs28730673 | N.D.  | 0,01 | NRF | 9  | QLKTGE <b>C</b> CL                                     |
| PIK3CD  | CR 437 | rs28730673 | N.D.  | 0,01 | NRF | 9  | QLKTGE <b>R</b> CL                                     |
| PIK3CD  | YY 936 | rs11121484 | 0,4   | 0,06 | ARF | 11 | SVSHSSSP <b>M</b> TTL                                  |
| PIK3CD  | YY 936 | rs11121484 | 0,4   | 0,06 | ARF | 11 | SVSHSSSP <b>T</b> TTL                                  |
| PLCB2   | TT 477 | rs2229691  | 0,46  | 0,23 | ARF | 9  | APPPPV <b>R</b> IL                                     |
| PLCB2   | TT 477 | rs2229691  | 0,46  | 0,23 | ARF | 11 | FLAPPPV <b>R</b> IL                                    |
| PLCB2   | TT 477 | rs2229691  | 0,46  | 0,23 | ARF | 9  | ILVGR <b>L</b> RAA                                     |
| PLCB2   | TT 477 | rs2229691  | 0,46  | 0,23 | ARF | 10 | ILVGR <b>L</b> RAAA                                    |
| PLCB2   | TT 477 | rs2229691  | 0,46  | 0,23 | ARF | 10 | LAPPPV <b>R</b> IL                                     |
| PLCB2   | TT 477 | rs2229691  | 0,46  | 0,23 | ARF | 10 | RILVGR <b>L</b> RAA                                    |
| PLEK    | NK 97  | rs3816281  | 0,5   | 0,29 | NRF | 9  | DI <b>K</b> KAIKCI                                     |
| PLEK    | NK 97  | rs3816281  | 0,5   | 0,29 | NRF | 9  | DI <b>N</b> KAIKCI                                     |
| PLEK    | NK 97  | rs3816281  | 0,5   | 0,29 | ARF | 10 | GIS <b>I</b> RPLNAL                                    |
| PLEK    | NK 97  | rs3816281  | 0,5   | 0,29 | ARF | 10 | GIS <b>R</b> RPLNAL                                    |
| PRKCB1  | RR 238 | rs17847891 | N.D.  | 0,00 | ARF | 9  | RIGQRQ <b>E</b> TV                                     |
| PRKCB1  | RR 238 | rs17847891 | N.D.  | 0,00 | ARF | 9  | RIGQRQ <b>K</b> TV                                     |
| PRKCB1  | II 508 | rs17847876 | N.D.  | 0,00 | ARF | 10 | RLH <b>C</b> PRDNCL                                    |
| PRKCB1  | II 508 | rs17847876 | N.D.  | 0,00 | ARF | 10 | RLH <b>R</b> PRDNCL                                    |
| PRKCB1  | PS 563 | rs17847879 | N.D.  | 0,00 | NRF | 9  | P <b>M</b> SKEAVAI                                     |
| PRKCB1  | PS 563 | rs17847879 | N.D.  | 0,00 | NRF | 9  | S <b>M</b> SKEAVAI                                     |
| PSD4    | PP 58  | rs3738908  | 0,02  | 0,50 | ARF | 10 | LLN <b>Q</b> PDKMFL                                    |
| PSD4    | PP 58  | rs3738908  | 0,02  | 0,50 | ARF | 10 | LLN <b>L</b> PDKMFL                                    |
| PSD4    | PP 58  | rs3738908  | 0,02  | 0,50 | ARF | 9  | LLN <b>L</b> PDKMFL                                    |
| PSD4    | PP 58  | rs3738908  | 0,02  | 0,50 | ARF | 11 | N <b>L</b> PDKMFLPGA                                   |
| PSD4    | PP 58  | rs3738908  | 0,02  | 0,50 | ARF | 9  | TLLN <b>L</b> PDKM                                     |
| PSD4    | PP 58  | rs3738908  | 0,02  | 0,50 | ARF | 11 | TLLN <b>L</b> PDKMFL                                   |
| PSD4    | PP 58  | rs3738908  | 0,02  | 0,50 | ARF | 9  | TLLN <b>Q</b> PDKM                                     |
| PSD4    | PP 58  | rs3738908  | 0,02  | 0,50 | ARF | 11 | TLLN <b>Q</b> PDKMFL                                   |
| PSD4    | DE 124 | rs17857060 | N.D.  | 0,00 | ARF | 10 | A <b>Q</b> AESITRV                                     |
| PSD4    | DE 124 | rs17857060 | N.D.  | 0,00 | ARF | 10 | S <b>Q</b> AESITRV                                     |
| PSD4    | SS 216 | rs3748914  | 0,49  | N.D. | ARF | 10 | KTQ <b>G</b> KTAA <b>S</b> L                           |
| PSD4    | SS 216 | rs3748914  | 0,49  | N.D. | ARF | 10 | KTQ <b>G</b> KTAV <b>S</b> L                           |
| PSD4    | AG 269 | rs4849167  | 0,49  | 0,37 | NRF | 9  | A <b>A</b> SDSHAGV                                     |
| PSD4    | AG 269 | rs4849167  | 0,752 | 0,37 | ARF | 10 | G <b>L</b> QTPMQV <b>G</b> L                           |
| PSD4    | AG 269 | rs4849167  | 0,49  | 0,37 | NRF | 9  | G <b>A</b> SDSHAGV                                     |
| PSD4    | AG 269 | rs4849167  | 0,49  | 0,37 | ARF | 10 | L <b>L</b> ESAF <b>P</b> G <b>L</b>                    |
| PSD4    | AG 269 | rs4849167  | 0,49  | 0,37 | ARF | 10 | L <b>L</b> ESAF <b>P</b> G <b>R</b> L                  |
| PSD4    | AG 269 | rs4849167  | 0,752 | 0,37 | ARF | 10 | R <b>L</b> QTPMQV <b>G</b> L                           |
| PSD4    | AG 269 | rs4849167  | 0,49  | 0,37 | NRF | 11 | S <b>W</b> AASDSHAGV                                   |
| PSD4    | AG 269 | rs4849167  | 0,49  | 0,37 | ARF | 11 | V <b>L</b> LESAF <b>P</b> G <b>L</b>                   |
| PSD4    | AG 269 | rs4849167  | 0,49  | 0,37 | ARF | 11 | V <b>L</b> LESAF <b>P</b> G <b>R</b> L                 |
| PSD4    | AG 269 | rs4849167  | 0,49  | 0,37 | NRF | 10 | W <b>A</b> ASDSHAGV                                    |
| PSD4    | GG 422 | rs2241976  | 0,49  | 0,38 | ARF | 9  | W <b>A</b> PPGI <b>S</b> SL                            |
| PSD4    | GG 422 | rs2241976  | 0,49  | 0,38 | ARF | 9  | W <b>T</b> PPGI <b>S</b> SL                            |
| PSMB8   | ST 70  | rs17220206 | 0,06  | N.D. | NRF | 9  | EMAHG <b>T</b> STL                                     |
| PSMB8   | ST 70  | rs17220206 | 0,06  | N.D. | NRF | 9  | EMAHG <b>T</b> TTL                                     |
| PSMB8   | ST 70  | rs17220206 | 0,06  | N.D. | NRF | 11 | Q <b>I</b> EMAHG <b>T</b> STL                          |
| PSMB8   | ST 70  | rs17220206 | 0,06  | N.D. | NRF | 11 | Q <b>I</b> EMAHG <b>T</b> TTL                          |
| PSMB8   | ST 70  | rs17220206 | 0,06  | N.D. | NRF | 11 | S <b>T</b> LAFK <b>F</b> QHGV                          |
| PSMB8   | ST 70  | rs17220206 | 0,06  | N.D. | NRF | 11 | S <b>T</b> LAFK <b>F</b> QHGV                          |
| PSMB8   | LL 163 | rs11540143 | N.D.  | 0,00 | ARF | 10 | P <b>L</b> Y <b>G</b> QYDLWL                           |
| PSMB10  | LL 107 | rs20549    | 0,42  | 0,32 | ARF | 9  | G <b>V</b> QDGAT <b>R</b> V                            |
| PSMB10  | GG 151 | rs14178    | 0,23  | 0,04 | ARF | 10 | AAL <b>R</b> CASP <b>L</b>                             |
| PSMB10  | GG 151 | rs14178    | 0,23  | 0,04 | ARF | 10 | AAL <b>R</b> RASP <b>L</b>                             |
| PSMB10  | GG 151 | rs14178    | 0,23  | 0,04 | ARF | 9  | AL <b>R</b> CASP <b>L</b>                              |
| PSMB10  | GG 151 | rs14178    | 0,23  | 0,04 | ARF | 10 | AL <b>R</b> CASP <b>L</b> L                            |
| PSMB10  | GG 151 | rs14178    | 0,23  | 0,04 | ARF | 9  | AL <b>R</b> RASP <b>L</b>                              |
| PSMB10  | GG 151 | rs14178    | 0,23  | 0,04 | ARF | 10 | AL <b>R</b> RASP <b>L</b> L                            |
| PTPN22  | RR 620 | rs2476601  | 0,25  | 0,00 | NRF | 11 | P <b>V</b> RT <b>P</b> ESF <b>I</b> VV                 |
| PTPN22  | RR 620 | rs2476601  | 0,25  | 0,00 | NRF | 11 | P <b>V</b> W <b>T</b> PE <b>S</b> F <b>I</b> VV        |
| PTPN22  | RR 620 | rs2476601  | 0,25  | 0,00 | NRF | 9  | R <b>T</b> PE <b>S</b> F <b>I</b> VV                   |
| PTPN22  | RR 620 | rs2476601  | 0,25  | 0,00 | NRF | 9  | W <b>T</b> PE <b>S</b> F <b>I</b> VV                   |
| PTPN6   | PL 28  | rs11547853 | N.D.  | 0,00 | ARF | 10 | R <b>L</b> GPV <b>A</b> R <b>T</b> R <b>V</b>          |
| PTPN6   | PL 28  | rs11547853 | N.D.  | 0,00 | ARF | 11 | S <b>R</b> LGPV <b>A</b> R <b>T</b> R <b>V</b>         |
| PTPN6   | PL 28  | rs11547853 | N.D.  | 0,00 | ARF | 11 | S <b>W</b> LGPV <b>A</b> R <b>T</b> R <b>V</b>         |
| PTPN6   | PL 28  | rs11547853 | N.D.  | 0,00 | ARF | 10 | ST <b>V</b> AS <b>R</b> LGP <b>V</b>                   |
| PTPN6   | PL 28  | rs11547853 | N.D.  | 0,00 | ARF | 10 | ST <b>V</b> AS <b>W</b> LGP <b>V</b>                   |
| PTPN6   | PL 28  | rs11547853 | N.D.  | 0,00 | ARF | 9  | TVAS <b>R</b> LGP <b>V</b>                             |
| PTPN6   | PL 28  | rs11547853 | N.D.  | 0,00 | ARF | 9  | TVAS <b>W</b> LGP <b>V</b>                             |
| PTPN6   | PL 28  | rs11547853 | N.D.  | 0,00 | ARF | 10 | W <b>L</b> G <b>P</b> V <b>A</b> R <b>T</b> R <b>V</b> |
| PTPN6   | VV 85  | rs1048596  | N.D.  | 0,00 | ARF | 10 | TL <b>S</b> SR <b>V</b> C <b>R</b> T                   |
| PTPN6   | VV 85  | rs1048596  | N.D.  | 0,00 | ARF | 10 | TL <b>S</b> SR <b>V</b> S <b>C</b> R <b>T</b>          |
| PTPN6   | VV 85  | rs1048596  | N.D.  | 0,00 | ARF | 10 | VL <b>H</b> SAAG <b>C</b> A <b>A</b>                   |
| PTPN6   | VV 85  | rs1048596  | N.D.  | 0,00 | ARF | 10 | VL <b>H</b> SAAG <b>C</b> P <b>A</b>                   |
| RASGRP2 | II 83  | rs11231864 | N.D.  | 0,00 | ARF | 10 | N <b>V</b> PP <b>F</b> Q <b>V</b> LDL                  |
| RASGRP2 | II 83  | rs11231864 | N.D.  | 0,00 | ARF | 11 | Q <b>V</b> LD <b>F</b> R <b>L</b> PS <b>G</b> V        |
| RASGRP2 | II 83  | rs11231864 | N.D.  | 0,00 | ARF | 11 | Q <b>V</b> LD <b>L</b> R <b>L</b> PS <b>G</b> V        |
| RASGRP2 | II 83  | rs11231864 | N.D.  | 0,00 | ARF | 10 | VLD <b>F</b> R <b>L</b> PS <b>G</b> V                  |
| RASGRP2 | II 83  | rs11231864 | N.D.  | 0,00 | ARF | 10 | VLD <b>L</b> R <b>L</b> PS <b>G</b> V                  |
| RASGRP2 | GG 583 | rs2230414  | 0,35  | N.D. | ARF | 9  | AL <b>A</b> GE <b>A</b> P <b>L</b>                     |
| RASGRP2 | GG 583 | rs2230414  | 0,35  | N.D. | ARF | 9  | AL <b>E</b> GE <b>A</b> P <b>L</b>                     |
| RASGRP2 | GG 583 | rs2230414  | 0,35  | N.D. | ARF | 9  | SL <b>C</b> P <b>A</b> L <b>A</b> GE                   |
| RASGRP2 | GG 583 | rs2230414  | 0,35  | N.D. | ARF | 10 | SL <b>C</b> P <b>A</b> L <b>A</b> GE <b>A</b>          |

|         |        |            |      |      |     |    |                                                          |
|---------|--------|------------|------|------|-----|----|----------------------------------------------------------|
| RASGRP2 | GG 583 | rs2230414  | 0,35 | N.D  | ARF | 9  | SLCPAL <b>E</b> GE                                       |
| RASGRP2 | GG 583 | rs2230414  | 0,35 | N.D  | ARF | 10 | SLCPAL <b>E</b> GEA                                      |
| SELL    | GG 22  | rs4987279  | 0,04 | 0,00 | ARF | 10 | LMEHLQVV <b>G</b> L                                      |
| SELL    | GG 22  | rs4987279  | 0,04 | 0,00 | ARF | 10 | LMEHLQVV <b>G</b> V                                      |
| SELL    | LL 107 | rs1051091  | 0,38 | 0,17 | ARF | 11 | LLKKQRTGEM <b>V</b>                                      |
| SELL    | LL 107 | rs1051091  | 0,38 | 0,17 | ARF | 9  | NL <b>L</b> LKKQRT                                       |
| SELL    | LL 107 | rs1051091  | 0,38 | 0,17 | ARF | 9  | NL <b>S</b> LKKQRT                                       |
| SELL    | LL 107 | rs1051091  | 0,38 | 0,17 | ARF | 11 | SLKKQRTGEM <b>V</b>                                      |
| SELL    | FL 193 | rs1131498  | 0,29 | 0,28 | NRF | 9  | QLVIQCE <b>P</b> L                                       |
| SELL    | SP 213 | rs2229569  | 0,26 | 0,09 | NRF | 11 | ELGTMDCTH <b>P</b> L                                     |
| SELL    | SP 213 | rs2229569  | 0,26 | 0,09 | NRF | 11 | ELGTMDCTH <b>S</b> L                                     |
| SELL    | SP 213 | rs2229569  | 0,26 | 0,09 | NRF | 9  | GTMDCTH <b>P</b> L                                       |
| SELL    | SP 213 | rs2229569  | 0,26 | 0,09 | NRF | 9  | GTMDCTH <b>S</b> L                                       |
| SELL    | SP 213 | rs2229569  | 0,26 | 0,09 | ARF | 9  | S <b>L</b> FGKLQLQ                                       |
| SELL    | SP 213 | rs2229569  | 0,26 | 0,09 | ARF | 10 | S <b>L</b> FGKLQLQL                                      |
| SELPLG  | IM 62  | rs2228315  | 0,34 | 0,07 | NRF | 10 | FLPETEP <b>P</b> EI                                      |
| SELPLG  | IM 62  | rs2228315  | 0,34 | 0,07 | NRF | 11 | FLPETEP <b>E</b> IL                                      |
| SELPLG  | IM 62  | rs2228315  | 0,34 | 0,07 | NRF | 10 | FLPETEP <b>P</b> EM                                      |
| SELPLG  | IM 62  | rs2228315  | 0,34 | 0,07 | NRF | 11 | FLPETEP <b>P</b> EML                                     |
| SELPLG  | IM 62  | rs2228315  | 0,34 | 0,07 | NRF | 9  | ILRN <b>S</b> TDTT                                       |
| SELPLG  | IM 62  | rs2228315  | 0,34 | 0,07 | NRF | 11 | ILRN <b>S</b> TDTTPL                                     |
| SELPLG  | IM 62  | rs2228315  | 0,34 | 0,07 | NRF | 11 | MLRN <b>S</b> TDTTPL                                     |
| SELPLG  | VM 264 | rs7300972  | 0,08 | 0,00 | NRF | 11 | LS <b>M</b> EPTTKRGL                                     |
| SELPLG  | VM 264 | rs7300972  | 0,08 | 0,00 | NRF | 11 | LS <b>V</b> EPTTKRGL                                     |
| SELPLG  | VM 264 | rs7300972  | 0,08 | 0,00 | NRF | 10 | S <b>M</b> EPTTKRGL                                      |
| SELPLG  | VM 264 | rs7300972  | 0,08 | 0,00 | NRF | 10 | S <b>V</b> EPTTKRGL                                      |
| SEPT6   | PL 406 | rs17856302 | N.D. | 0,40 | ARF | 11 | EL <b>L</b> QSQGSQAG                                     |
| SEPT6   | PL 406 | rs17856302 | N.D. | 0,40 | ARF | 9  | L <b>L</b> QSQGSQA                                       |
| SEPT6   | PL 406 | rs17856302 | N.D. | 0,40 | NRF | 9  | RL <b>S</b> C <b>P</b> SPRA                              |
| SEPT6   | PL 406 | rs17856302 | N.D. | 0,40 | NRF | 9  | RL <b>S</b> C <b>S</b> SPRA                              |
| SF1     | PP 499 | rs2277308  | N.D. | 0,00 | ARF | 11 | P <b>M</b> ATTA <b>A</b> AA <b>A</b> SA                  |
| SF1     | PP 499 | rs2277308  | N.D. | 0,00 | ARF | 11 | P <b>V</b> ATTA <b>A</b> AA <b>A</b> SA                  |
| SF1     | PP 499 | rs2277308  | N.D. | 0,00 | ARF | 9  | SL <b>W</b> SS <b>S</b> P <b>M</b> A                     |
| SF1     | PP 499 | rs2277308  | N.D. | 0,00 | ARF | 10 | SL <b>W</b> SS <b>S</b> P <b>M</b> AT                    |
| SF1     | PP 499 | rs2277308  | N.D. | 0,00 | ARF | 11 | SL <b>W</b> SS <b>S</b> P <b>M</b> ATT                   |
| SF1     | PP 499 | rs2277308  | N.D. | 0,00 | ARF | 9  | SL <b>W</b> SS <b>S</b> P <b>V</b> A                     |
| SF1     | PP 499 | rs2277308  | N.D. | 0,00 | ARF | 10 | SL <b>W</b> SS <b>S</b> P <b>V</b> AT                    |
| SF1     | PP 499 | rs2277308  | N.D. | 0,00 | ARF | 11 | SL <b>W</b> SS <b>S</b> P <b>V</b> ATT                   |
| SOCS2   | GE 7   | rs7956250  | N.D. | 0,01 | ARF | 10 | F <b>S</b> HDP <b>A</b> VP <b>W</b> A                    |
| SP110   | RW 112 | rs1129411  | N.D. | 0,08 | NRF | 10 | <b>W</b> QSRD <b>T</b> PILL                              |
| SP110   | RW 112 | rs1129411  | N.D. | 0,08 | NRF | 10 | <b>Y</b> EWQSRD <b>T</b> PI                              |
| SP110   | VA 128 | rs11556887 | 0,11 | N.D. | NRF | 10 | GL <b>A</b> E <b>G</b> SS <b>L</b> HT                    |
| SP110   | VA 128 | rs11556887 | 0,11 | N.D. | NRF | 10 | GL <b>V</b> E <b>G</b> SS <b>L</b> HT                    |
| SP110   | VA 128 | rs11556887 | 0,11 | N.D. | NRF | 10 | IL <b>L</b> E <b>A</b> PT <b>G</b> L <b>A</b>            |
| SP110   | VA 128 | rs11556887 | 0,11 | N.D. | NRF | 11 | IL <b>L</b> E <b>A</b> PT <b>G</b> L <b>A</b> E          |
| SP110   | VA 128 | rs11556887 | 0,11 | N.D. | NRF | 10 | IL <b>L</b> E <b>A</b> PT <b>G</b> L <b>V</b>            |
| SP110   | VA 128 | rs11556887 | 0,11 | N.D. | NRF | 11 | IL <b>L</b> E <b>A</b> PT <b>G</b> L <b>V</b> E          |
| SP110   | VA 128 | rs11556887 | 0,11 | N.D. | NRF | 9  | L <b>L</b> E <b>A</b> PT <b>G</b> L <b>V</b>             |
| SP110   | VA 206 | rs28930679 | 0,05 | N.D. | NRF | 11 | K <b>M</b> N <b>A</b> E <b>E</b> D <b>S</b> E <b>E</b> M |
| SP110   | VA 206 | rs28930679 | 0,05 | N.D. | NRF | 11 | K <b>M</b> N <b>V</b> E <b>E</b> D <b>S</b> E <b>E</b> M |
| SP110   | KE 207 | rs9061     | 0,31 | 0,11 | NRF | 11 | K <b>M</b> N <b>A</b> K <b>E</b> D <b>S</b> E <b>E</b> M |
| SP110   | RG 299 | rs1365776  | 0,52 | 0,44 | NRF | 9  | S <b>L</b> P <b>G</b> T <b>A</b> SS                      |
| SP110   | RG 299 | rs1365776  | 0,52 | 0,44 | NRF | 9  | S <b>L</b> P <b>R</b> G <b>T</b> A <b>S</b> S            |
| SP110   | LS 303 | rs17856587 | N.D. | 0,00 | NRF | 9  | S <b>L</b> P <b>R</b> G <b>T</b> A <b>S</b> S            |
| SP110   | SL 425 | rs3948464  | 0,29 | 0,10 | NRF | 11 | R <b>L</b> K <b>E</b> K <b>K</b> K <b>E</b> K <b>D</b> I |
| SP110   | MT 523 | rs1135791  | 0,41 | 0,45 | NRF | 9  | N <b>I</b> R <b>C</b> E <b>G</b> <b>M</b> T <b>L</b>     |
| SP110   | MT 523 | rs1135791  | 0,41 | 0,45 | NRF | 9  | N <b>I</b> R <b>C</b> E <b>G</b> <b>T</b> T <b>L</b>     |
| SP110   | CC 577 | rs13018234 | 0,12 | N.D. | ARF | 10 | EL <b>H</b> L <b>L</b> Q <b>D</b> E <b>E</b> V           |
| SP110   | IM 579 | rs3948463  | 0,05 | 0,08 | ARF | 10 | EL <b>H</b> L <b>L</b> Q <b>D</b> K <b>E</b> V           |
| SP110   | IM 579 | rs3948463  | 0,05 | 0,08 | ARF | 11 | H <b>L</b> LQ <b>D</b> E <b>E</b> V <b>F</b> R <b>K</b>  |
| SP110   | IM 579 | rs3948463  | 0,05 | 0,08 | ARF | 11 | H <b>L</b> LQ <b>D</b> K <b>E</b> V <b>F</b> R <b>K</b>  |
| SP110   | IM 579 | rs3948463  | 0,05 | 0,08 | NRF | 10 | M <b>L</b> W <b>S</b> C <b>T</b> F <b>C</b> R <b>I</b>   |
| SP110   | IM 579 | rs3948463  | 0,05 | 0,08 | NRF | 10 | M <b>L</b> W <b>S</b> C <b>T</b> F <b>C</b> R <b>I</b>   |
| SP110   | IM 579 | rs3948463  | 0,05 | 0,08 | NRF | 11 | M <b>L</b> W <b>S</b> C <b>T</b> F <b>C</b> R <b>I</b>   |
| SYNGR1  | LF 153 | rs1062695  | N.D. | 0,00 | NRF | 10 | A <b>A</b> I <b>A</b> L <b>S</b> F <b>F</b> S <b>I</b>   |
| SYNGR1  | LF 153 | rs1062695  | N.D. | 0,00 | NRF | 9  | A <b>L</b> S <b>F</b> F <b>S</b> I <b>F</b> T            |
| SYNGR1  | LF 153 | rs1062695  | N.D. | 0,00 | NRF | 11 | A <b>L</b> S <b>F</b> F <b>S</b> I <b>F</b> T <b>W</b> A |
| SYNGR1  | LF 153 | rs1062695  | N.D. | 0,00 | NRF | 10 | A <b>A</b> I <b>A</b> F <b>S</b> F <b>F</b> S <b>I</b>   |
| SYNGR1  | LF 153 | rs1062695  | N.D. | 0,00 | NRF | 9  | A <b>I</b> A <b>F</b> S <b>F</b> S <b>I</b>              |
| SYNGR1  | LF 153 | rs1062695  | N.D. | 0,00 | NRF | 9  | A <b>I</b> A <b>L</b> S <b>F</b> F <b>S</b> I            |
| SYNGR1  | LF 153 | rs1062695  | N.D. | 0,00 | NRF | 10 | F <b>S</b> F <b>F</b> S <b>I</b> F <b>T</b> W <b>A</b>   |
| SYNGR1  | LF 153 | rs1062695  | N.D. | 0,00 | NRF | 10 | I <b>A</b> F <b>S</b> F <b>F</b> S <b>I</b> F <b>T</b>   |
| SYNGR1  | LF 153 | rs1062695  | N.D. | 0,00 | NRF | 10 | I <b>A</b> L <b>S</b> F <b>F</b> S <b>I</b> F <b>T</b>   |
| SYNGR1  | LF 153 | rs1062695  | N.D. | 0,00 | ARF | 9  | L <b>L</b> L <b>F</b> L <b>H</b> L <b>H</b> L            |
| SYNGR1  | LF 153 | rs1062695  | N.D. | 0,00 | ARF | 9  | P <b>L</b> L <b>F</b> L <b>H</b> L <b>H</b> L            |
| SYNGR1  | LF 153 | rs1062695  | N.D. | 0,00 | NRF | 10 | R <b>L</b> L <b>L</b> F <b>L</b> H <b>L</b> H <b>L</b>   |
| SYNGR1  | KQ 164 | rs11548411 | N.D. | 0,09 | ARF | 9  | F <b>T</b> W <b>A</b> G <b>K</b> A <b>V</b> L            |
| SYNGR1  | KQ 164 | rs11548411 | N.D. | 0,09 | ARF | 9  | F <b>T</b> W <b>A</b> G <b>Q</b> A <b>V</b> L            |
| SYNGR1  | KQ 164 | rs11548411 | N.D. | 0,09 | ARF | 10 | G <b>Q</b> G <b>C</b> A <b>G</b> L <b>P</b> A <b>V</b>   |
| SYNGR1  | KQ 164 | rs11548411 | N.D. | 0,09 | ARF | 10 | H <b>L</b> G <b>G</b> P <b>G</b> C <b>A</b> G <b>L</b>   |
| SYNGR1  | KQ 164 | rs11548411 | N.D. | 0,09 | ARF | 10 | H <b>L</b> G <b>G</b> Q <b>G</b> C <b>A</b> G <b>L</b>   |
| SYNGR1  | KQ 164 | rs11548411 | N.D. | 0,09 | ARF | 9  | L <b>G</b> G <b>P</b> G <b>C</b> A <b>G</b> L            |
| SYNGR1  | KQ 164 | rs11548411 | N.D. | 0,09 | ARF | 10 | S <b>I</b> F <b>T</b> W <b>A</b> G <b>K</b> A <b>V</b>   |
| SYNGR1  | KQ 164 | rs11548411 | N.D. | 0,09 | ARF | 11 | S <b>I</b> F <b>T</b> W <b>A</b> G <b>K</b> A <b>V</b> L |
| SYNGR1  | KQ 164 | rs11548411 | N.D. | 0,09 | ARF | 10 | S <b>I</b> F <b>T</b> W <b>A</b> G <b>Q</b> A <b>V</b>   |
| SYNGR1  | KQ 164 | rs11548411 | N.D. | 0,09 | ARF | 11 | S <b>I</b> F <b>T</b> W <b>A</b> G <b>Q</b> A <b>V</b> L |
| ZFP36L2 | II 203 | rs8098     | 0,08 | 0,08 | ARF | 10 | A <b>V</b> P <b>H</b> L <b>S</b> Y <b>H</b> W <b>L</b>   |

|                 |        |                 |      |      |     |    |                          |
|-----------------|--------|-----------------|------|------|-----|----|--------------------------|
| ZFP36L2         | II 203 | rs8098          | 0,08 | 0,08 | ARF | 10 | HLSYH <sup>R</sup> LLPL  |
| ZFP36L2         | II 203 | rs8098          | 0,08 | 0,08 | ARF | 10 | HLSYH <sup>W</sup> LLPL  |
| ZFP36L2         | II 203 | rs8098          | 0,08 | 0,08 | ARF | 9  | <sup>R</sup> LLPLWAAL    |
| ZFP36L2         | II 203 | rs8098          | 0,08 | 0,08 | ARF | 11 | <sup>R</sup> LLPLWAALPL  |
| ZFP36L2         | II 203 | rs8098          | 0,08 | 0,08 | ARF | 9  | <sup>W</sup> LLPLWAAL    |
| ZFP36L2         | II 203 | rs8098          | 0,08 | 0,08 | ARF | 11 | <sup>W</sup> LLPLWAALPL  |
| ZFP36L2         | LL 254 | rs7933          | 0,5  | 0,32 | ARF | 10 | <sup>A</sup> APQPQLLGL   |
| ZFP36L2         | LL 254 | rs7933          | 0,5  | 0,32 | ARF | 10 | GLPAGAAAQ <sup>A</sup>   |
| ZFP36L2         | LL 254 | rs7933          | 0,5  | 0,32 | ARF | 10 | GLPAGAAAQ <sup>V</sup>   |
| ZFP36L2         | LL 254 | rs7933          | 0,5  | 0,32 | ARF | 11 | Q <sup>V</sup> APQPQLLGL |
| ZFP36L2         | LL 254 | rs7933          | 0,5  | 0,32 | ARF | 10 | <sup>V</sup> APQPQLLGL   |
| HMHA1 (red)     | RH 139 | rs1801284       | 0,04 | 0,37 | NRF | 9  | VLH <sup>D</sup> DLLEA   |
| ADIR-F (N.D.)   | FL 13  | rs2296377       | 0,28 | 0,03 | ARF | 11 | SVAPALAL <sup>F</sup> PA |
| CMV (green)     | none   | no polymorphism | -    | N.D. | NRF | 9  | NLVPMVATV                |
| EBV (orange)    | none   | no polymorphism | -    | N.D. | NRF | 9  | GLCTLVAML                |
| FLU (pink)      | none   | no polymorphism | -    | N.D. | NRF | 9  | GILGFVFTL                |
| HY (N.D.)       | none   | no polymorphism | -    | N.D. | NRF | 9  | FIDSYICQV                |
| Mart-I (blue)   | none   | no polymorphism | -    | N.D. | NRF | 9  | AAGIGILTV                |
| A3-GP100 (grey) | none   | no polymorphism | -    | N.D. | NRF | 9  | LIYRRRLMK                |

<sup>a</sup> dbSNP average heterozygosity (build126)

<sup>β</sup> SNP frequency obtained from customized SNP genotyping array. Data represents the allele frequency of 100 Dutch individuals

<sup>γ</sup> Peptide sequences are provided with polymorphic residue in red
