# Supplementary material for: High-Throughput Identification of Potential Minor Histocompatibility Antigens by MHC Tetramer-Based Screening: Feasibility and Limitations
Source: PubMed Central journal article supplement (PMC3151248; doi:10.1371/journal.pone.0022523), 2011-08-05
Supplement: pone.0022523.s005.pdf [file pone.0022523.s005.pdf]

Supplementary Table III. Dual-encoding pMHC tetramer scheme

| Peptide number | Gene symbol | Peptide Sequence <sup>a</sup> | RS MHC-ELISA <sup>b</sup> | RS MHC-Bead <sup>c</sup> | Tetramer group | Dual-color encoding |
|----------------|-------------|-------------------------------|---------------------------|--------------------------|----------------|---------------------|
| 1              | NUP210      | M I H D L C L V F L           | 71                        | 38                       | 1              | PE & Q565           |
| 2              | NUP210      | C L V F P A P A K A V         | 56                        | 51                       |                | PE & Q585           |
| 3              | PSD4        | V L L E S A F P G G L         | 73                        | 79                       |                | PE & Q605           |
| 4              | PLCB2       | R I L V G R L R A A           | 84                        | 79                       |                | PE & Q655           |
| 5              | HSPA6       | S L A S L L P H V             | 88                        | 101                      |                | PE & Q705           |
| 6              | CSF3R       | T Q P G P L V P L             | 70                        | 63                       |                | PE & Q800           |
| 7              | HSPA6       | G I P P A P H G V             | 73                        | 98                       |                | APC & Q565          |
| 8              | ARHGAP15    | K L G D C I W T Y L           | 78                        | 39                       |                | APC & Q605          |
| 9              | GNA15       | R T I P T L Q P L             | 74                        | 56                       |                | APC & Q655          |
| 10             | CPVL        | A L T E H S L M G M           | 22                        | 86                       |                | APC & Q800          |
| 11             | ICAM3       | A L C Q N G Y H G T I         | 61                        | 66                       |                | Q565 & Q605         |
| 12             | PSD4        | T L L N Q P D K M F L         | 104                       | 84                       |                | Q565 & Q655         |
| 13             | PSD4        | L L N Q P D K M F L           | 82                        | 21                       |                | Q565 & Q705         |
| 14             | SELL        | G T M D C T H P L             | 120                       | 74                       |                | Q585 & Q605         |
| 15             | ZFP36L2     | W L L P L W A A L P L         | 81                        | 77                       |                | Q585 & Q655         |
| 16             | MPL         | R L R A P E V F L             | 66                        | 31                       |                | Q585 & Q705         |
| 17             | HSPA6       | G L L Q V H H S C P L         | 84                        | 33                       |                | Q605 & Q705         |
| 18             | NCF4        | M M L P S Q P T L L           | 86                        | 95                       |                | Q605 & Q800         |
| 19             | NCF4        | M L P S Q P T L L             | 50                        | 56                       |                | Q655 & Q705         |
| 20             | MCM5        | Y L C D K V I P G             | 96                        | 90                       |                | Q655 & Q800         |
| 21             | HY          | F I D S Y I C Q V             | N.D.                      | N.D.                     |                | Q705 & Q800         |
| 22             | CPVL        | R Q V G D F H Q V             | 79                        | 76                       | 2              | PE & APC            |
| 23             | CD79b       | L L L S A E V Q Q H L         | 89                        | 97                       |                | PE & Q565           |
| 24             | KCNAB2      | N L F D T A K V Y A           | 95                        | 85                       |                | PE & Q585           |
| 25             | HSPA6       | N L L G R F E L I G I         | 65                        | 70                       |                | PE & Q605           |
| 26             | HSPA6       | V L N S V A S L L             | 107                       | 58                       |                | PE & Q655           |
| 27             | NUP210      | D C L V F L A P A             | 46                        | 57                       |                | PE & Q705           |
| 28             | NUP210      | Q I L P L H G P E A           | 63                        | 51                       |                | PE & Q800           |
| 29             | ICAM3       | V L Q W L S D N R L           | 59                        | 43                       |                | APC & Q585          |
| 30             | ARHGAP 25   | S L Q R M V Q E L             | 92                        | 96                       |                | APC & Q605          |
| 31             | SP110       | E L H L L Q D E E V           | 26                        | 25                       |                | APC & Q655          |
| 32             | NUP210      | V L A S I E P E L P M         | 70                        | 55                       |                | APC & Q705          |
| 33             | SELPLG      | F L P E T E P P E M           | 94                        | 93                       |                | APC & Q800          |
| 34             | ICAM3       | T M L G R R P P I             | 69                        | 88                       |                | Q565 & Q605         |
| 35             | SELL        | S L F G K L Q L Q L           | 42                        | 60                       |                | Q565 & Q655         |
| 36             | FNBP1       | L A G S S L N P V             | 67                        | 99                       |                | Q565 & Q705         |
| 37             | DOCK2       | S I Q N Y H P F A             | 60                        | 51                       |                | Q585 & Q605         |
| 38             | ZFP36L2     | H L S Y H R L L P L           | 77                        | 44                       |                | Q585 & Q655         |
| 39             | DOCK2       | K L L Q I Q L R A K V         | 49                        | 78                       |                | Q585 & Q705         |
| 40             | DOCK2       | K L L Q I Q L C A             | 103                       | 72                       |                | Q605 & Q655         |
| 41             | HSPA6       | S L F E G V D F Y T           | 77                        | 77                       |                | Q605 & Q705         |
| 42             | FLT3        | S M P Q G T F P V             | 63                        | 87                       |                | Q605 & Q800         |
| 43             | SF1         | S L W S S S P M A             | 101                       | 102                      |                | Q655 & Q705         |
| 44             | CD48        | L L F E T V M C D T           | 100                       | 72                       |                | Q655 & Q800         |
| 45             | HSPA6       | F M T S S W W R A P L         | N.D.                      | 73                       |                | Q705 & Q800         |
| 46             | HMHA1       | V L H D D L L E A             | 83                        | 91                       | 3              | PE & APC            |
| 47             | IQGAP2      | S V V K I Q S W F R M         | 59                        | 62                       |                | PE & Q565           |
| 48             | KCNAB2      | N L F D T A E V Y A A         | 50                        | 59                       |                | PE & Q585           |
| 49             | ITGAL       | T A L R L T A F A S L         | 64                        | 34                       |                | PE & Q605           |
| 50             | LCP2        | M M K M M C I K D L           | 36                        | 69                       |                | PE & Q655           |
| 51             | HSPA6       | N L L G R F E L I             | 65                        | 76                       |                | PE & Q705           |
| 52             | CSF3R       | T Q P G P L A P L             | 76                        | 79                       |                | PE & Q800           |
| 53             | ZFP36L2     | G L P A G A A A Q A           | 35                        | 54                       |                | APC & Q565          |
| 54             | DOCK2       | T L T T G E W A V             | 68                        | 73                       |                | APC & Q605          |
| 55             | SP110       | M L W S C T F C R M           | 63                        | 88                       |                | APC & Q655          |
| 56             | ITGAM       | M M S E G G P P G A           | 59                        | 63                       |                | APC & Q705          |
| 57             | NUP210      | V L A S I E P E L             | 79                        | 96                       |                | APC & Q800          |
| 58             | ICAM3       | A L C Q N G Y H G T           | 56                        | 74                       |                | Q565 & Q605         |
| 59             | PSD4        | T L L N L P D K M F L         | 93                        | 93                       |                | Q565 & Q655         |
| 60             | PSD4        | L L N L P D K M F L           | 88                        | 26                       |                | Q565 & Q705         |
| 61             | HSPA6       | L L Q V H H S C P L           | 33                        | -14                      |                | Q585 & Q605         |
| 62             | BTK         | Y I P S C T V V G M           | 52                        | 66                       |                | Q585 & Q655         |
| 63             | ZFP36L2     | R L L P L W A A L             | 88                        | 71                       |                | Q585 & Q705         |
| 64             | EVI2B       | L P P P P L L D L             | 69                        | 19                       |                | Q605 & Q800         |
| 65             | EVI2B       | D L P P P P P L L             | 41                        | 58                       |                | Q655 & Q705         |
| 66             | ARHGAP4     | S L C P W S W R A A           | 90                        | 78                       |                | Q655 & Q800         |
| 67             | ADIR-1F     | S V A P A L A L F P A         | N.D.                      | N.D.                     |                | Q705 & Q800         |
| 68             | CPVL        | R Q A G D F H Q V             | 81                        | 86                       | 4              | PE & APC            |
| 69             | CD79b       | L L L P A E V Q Q H L         | 84                        | 99                       |                | PE & Q565           |
| 70             | KCNAB2      | N L F D T A E V Y A           | 81                        | 90                       |                | PE & Q585           |
| 71             | PLCB2       | F L A P P P P V R I L         | 70                        | 44                       |                | PE & Q605           |
| 72             | HSPA6       | V L N S L A S L L             | 86                        | 49                       |                | PE & Q655           |
| 73             | CSF3R       | I T Q P G P L V P L           | 82                        | 75                       |                | PE & Q705           |
| 74             | NUP210      | I L P L H G P E A             | 64                        | 43                       |                | PE & Q800           |
| 75             | ICAM3       | V L Q W L P D N R L           | 67                        | 52                       |                | APC & Q585          |
| 76             | ITGAM       | G T W E S N A N V             | 52                        | 74                       |                | APC & Q605          |
| 77             | GNA15       | T I P T P L Q P L             | 67                        | 66                       |                | APC & Q655          |
| 78             | NUP210      | V L A S I E A E L P M         | 87                        | 57                       |                | APC & Q705          |
| 79             | SELPLG      | F L P E T E P P E I           | 96                        | 90                       |                | APC & Q800          |
| 80             | ICAM3       | T M L G R R A P I             | 50                        | 58                       |                | Q565 & Q605         |
| 81             | FNBP1       | R L A G S S L N P V           | 91                        | 104                      |                | Q565 & Q655         |
| 82             | FNBP1       | L A G S S L N L V             | 71                        | 79                       |                | Q565 & Q705         |
| 83             | ZFP36L2     | W L L P L W A A L             | 97                        | 96                       |                | Q585 & Q655         |
| 84             | DOCK2       | R L T S T N P T T             | 67                        | 75                       |                | Q585 & Q705         |
| 85             | NCF4        | M M L P S Q P T L L T         | 52                        | 70                       |                | Q605 & Q655         |
| 86             | BTK         | C L C L L N P Q G T           | 18                        | 21                       |                | Q605 & Q705         |
| 87             | NCF4        | M M L P S R P T L             | 79                        | 61                       |                | Q605 & Q800         |
| 88             | N4BP2L1     | K L Y S E N L T L A           | 122                       | 86                       |                | Q655 & Q705         |
| 89             | ITGAM       | R L Q V P V E A V             | 58                        | 81                       | 5              | PE & APC            |
| 90             | ARHGAP4     | S L L S P L H C W A V         | 82                        | 71                       |                | PE & Q565           |
| 91             | FLT3        | K V L H E L F G M D I         | 84                        | 79                       |                | PE & Q585           |
| 92             | LRMP        | S L K L L E S L T P I         | 90                        | 93                       |                | PE & Q605           |
| 93             | HSPA6       | L L G R F E L I G I           | 82                        | 54                       |                | PE & Q655           |
| 94             | LRMP        | N C L K L L E S L             | 59                        | 51                       |                | PE & Q705           |
| 95             | HSPA6       | F I Q V Y E V E R A           | 77                        | 80                       |                | PE & Q800           |
| 96             | NCF4        | R M M L P S Q P T L           | 72                        | 80                       |                | APC & Q565          |
| 97             | NUP210      | R A P P T T P A L             | 65                        | 80                       |                | APC & Q585          |
| 98             | ARHGAP 25   | S L Q S T V Q E L             | 91                        | 94                       |                | APC & Q605          |
| 99             | SP110       | M L W S C T F C R I           | 100                       | 81                       |                | APC & Q655          |
| 100            | NUP210      | V L A S I E A E L             | 86                        | 99                       |                | APC & Q800          |

|     |           |             |      |     |             |
|-----|-----------|-------------|------|-----|-------------|
| 101 | FNBP1     | SRLAGSSLNPV | 90   | 90  | Q565 & Q655 |
| 102 | FNBP1     | RLAGSSLNL   | 91   | 73  | Q565 & Q705 |
| 103 | SP110     | ILLEAPTGLV  | 78   | 73  | Q585 & Q605 |
| 104 | ZFP36L2   | RLPLWAAALPL | 88   | 64  | Q585 & Q655 |
| 105 | ARHGAP 25 | MLLKLTSEFL  | 92   | 101 | Q585 & Q705 |
| 106 | DOCK2     | QLCAKVPPL   | 94   | 82  | Q605 & Q655 |
| 107 | IL2RG     | YLFSEKETS   | 88   | 76  | Q605 & Q705 |
| 108 | HSPA6     | LLHVHHCPL   | 61   | 26  | Q605 & Q800 |
| 109 | FMNL1     | SLWQLGAAVML | 96   | 95  | Q655 & Q705 |
| 110 | SYNGR1    | FTWAGKAVL   | 100  | 90  | Q655 & Q800 |
| 111 | CD48      | FVSGSGIAIA  | N.D. | 99  | Q705 & Q800 |
| 112 | CD79b     | TMASTVSRSA  | 53   | 72  | PE & APC    |
| 113 | IQGAP2    | FIDNTDSVV   | 49   | 74  | PE & Q565   |
| 114 | PSD4      | VLLSEAFPGR  | 72   | 55  | PE & Q585   |
| 115 | PSD4      | RLQTPMQVGL  | 87   | 65  | PE & Q605   |
| 116 | HSPA6     | SVASLLPHV   | 88   | 90  | PE & Q655   |
| 117 | CSF3R     | ITQPPGLAPL  | 73   | 83  | PE & Q705   |
| 118 | HSPA6     | GIPPARGV    | 71   | 96  | PE & Q800   |
| 119 | DOCK2     | LLTLTGEWAV  | 59   | 68  | APC & Q585  |
| 120 | ITGAM     | GMWESNAV    | 73   | 73  | APC & Q605  |
| 121 | CPVL      | ALTERSLMGM  | 72   | 23  | APC & Q705  |
| 122 | LTB       | FLTSGTQFSDA | 61   | 68  | APC & Q800  |
| 123 | HSPA6     | LIFDLGGGT   | 52   | 48  | Q565 & Q605 |
| 124 | FNBP1     | RLAGSSLNLV  | 84   | 93  | Q565 & Q655 |
| 125 | SELL      | GTMDCTHSL   | 87   | 57  | Q585 & Q705 |
| 126 | NCF4      | ALMVRQARGL  | 74   | 45  | Q585 & Q605 |
| 127 | CD69      | STLQGLTSV   | 74   | 78  | Q585 & Q655 |
| 128 | DOCK2     | RLTSTNPTM   | 43   | 50  | Q585 & Q705 |
| 129 | NCF4      | MMLPSRPTLLT | 45   | 58  | Q605 & Q655 |
| 130 | NCF4      | MMLPSRPTLL  | 78   | 93  | Q605 & Q705 |
| 131 | NCF4      | MMLPSQPTL   | 90   | 94  | Q605 & Q800 |
| 132 | SYNGR1    | FTWAGQAVL   | 95   | 81  | Q655 & Q705 |
| 133 | N4BP2L1   | KIYSENLKLA  | 104  | 82  | Q655 & Q800 |
| 134 | CSF3R     | AMARDPHSLWV | N.D. | 104 | Q705 & Q800 |
| 135 | CPVL      | RVTSIRLFEV  | 54   | 66  | PE & APC    |
| 136 | IQGAP2    | SIVKIQSWFRM | 55   | 77  | PE & Q565   |
| 137 | FLT3      | VLHELFGMDI  | 76   | 90  | PE & Q585   |
| 138 | ITGAL     | RALRLTAFASL | 92   | 29  | PE & Q605   |
| 139 | PSD4      | LLSEAFPGL   | 57   | 68  | PE & Q655   |
| 140 | PLCB2     | ILVGLRAA    | 104  | 86  | PE & Q705   |
| 141 | LRMP      | SLLQSRYSYL  | 74   | 13  | PE & Q800   |
| 142 | SELL      | QLVIQCEPL   | 67   | 65  | APC & Q565  |
| 143 | NUP210    | LLWVIAGVPV  | 80   | 80  | APC & Q585  |
| 144 | ARHGAP 25 | SLSMVQEL    | 93   | 96  | APC & Q605  |
| 145 | BTK       | KLANIQCPCL  | 87   | 77  | APC & Q655  |
| 146 | PSMB10    | ALRCASPWL   | 65   | 26  | APC & Q705  |
| 147 | SELPLG    | FLPETEPPEML | 69   | 60  | APC & Q800  |
| 148 | FNBP1     | SRLAGSSLNLV | 77   | 72  | Q565 & Q655 |
| 149 | PSD4      | LNLPDKMFL   | 64   | 58  | Q565 & Q705 |
| 150 | SP110     | ILLEAPTGLA  | 66   | 71  | Q585 & Q605 |
| 151 | ZFP36L2   | HLSYHWLLPL  | 80   | 25  | Q585 & Q655 |
| 152 | DOCK2     | KLLQIQCAKV  | 53   | 66  | Q585 & Q705 |
| 153 | DOCK2     | KLLQIQLRA   | 83   | 20  | Q605 & Q655 |
| 154 | IL2RG     | YLFSEKETS   | 88   | 75  | Q605 & Q705 |
| 155 | HSPA6     | VLVEGSTRI   | 74   | 55  | Q605 & Q800 |
| 156 | N4BP2L1   | KIYSENLKLA  | 108  | 93  | Q655 & Q705 |
| 157 | CD48      | LLSETVMCDT  | 100  | 81  | Q655 & Q800 |
| 158 | CD48      | FVSGSGIATA  | 110  | 91  | PE & APC    |
| 159 | KCNAB2    | MIMASTSSI   | 91   | 92  | PE & Q565   |
| 160 | NUP210    | IMIHDCLLA   | 104  | 86  | PE & Q585   |
| 161 | NCF4      | LLSDEDVAL   | 92   | 97  | PE & Q605   |
| 162 | ARHGAP 25 | SLQRTVQEL   | 87   | 84  | PE & Q655   |
| 163 | EVI2B     | LLFLLQMMQV  | 77   | 104 | PE & Q705   |
| 164 | NCF4      | RLSDEDVELM  | 67   | 64  | APC & Q565  |
| 165 | EVI2B     | LLQMMQVCL   | 74   | 91  | APC & Q585  |
| 166 | FMNL1     | SLWQLGAAV   | 76   | 61  | APC & Q605  |
| 167 | CORO1A    | KLQAPVQEL   | 79   | 53  | APC & Q655  |
| 168 | LYN       | RLQREWHTL   | 69   | 54  | APC & Q705  |
| 169 | RASGRP2   | VLDFRLPSPV  | 51   | 43  | APC & Q800  |
| 170 | PTPN6     | STVASRLGPV  | 72   | 74  | Q565 & Q605 |
| 171 | NCF4      | RCHELTVSL   | 33   | 69  | Q565 & Q655 |
| 172 | NCF4      | SLLSLPVWVLM | 74   | 48  | Q565 & Q705 |
| 173 | N4BP2L1   | MALENNYEV   | 59   | 83  | Q585 & Q605 |
| 174 | MAP4K1    | SLGIMAIEL   | 71   | 70  | Q585 & Q655 |
| 175 | SEPT6     | RLSCPPSPRA  | 53   | 64  | Q585 & Q705 |
| 176 | FCER1A    | ISTQQQATFLL | 56   | 55  | Q605 & Q655 |
| 177 | DUSP22    | MLGDPVPPTPT | 41   | 88  | Q605 & Q705 |
| 178 | SP110     | ELHLLQDKEV  | 23   | 47  | Q655 & Q800 |
| 179 | ATP2A3    | KMFVKGAPESV | N.D. | 98  | Q705 & Q800 |
| 180 | N4BP2L1   | KIYSENLTLA  | 92   | 95  | PE & APC    |
| 181 | N4BP2L1   | TMKIYSENLTL | 88   | 83  | PE & Q565   |
| 182 | FMNL1     | SLWQLGAAV   | 88   | 91  | PE & Q655   |
| 183 | EVI2B     | MMQVCLHHL   | 84   | 65  | PE & Q705   |
| 184 | NUP210    | LLIGATMQV   | 88   | 81  | PE & Q800   |
| 185 | HSPA6     | FMTSSWVRA   | 82   | 78  | APC & Q565  |
| 186 | IQGAP2    | ILHSRTEFI   | 80   | 81  | APC & Q605  |
| 187 | LRMP      | FLPRNIGNA   | 62   | 79  | APC & Q655  |
| 188 | FLT3      | ALARAGATVPL | 76   | 73  | APC & Q705  |
| 189 | NCF4      | PLPEAPLSL   | 77   | 91  | APC & Q800  |
| 190 | NCF4      | AISANIADI   | 47   | 56  | Q565 & Q605 |
| 191 | EVI2B     | LLFLLQMMQI  | 65   | 74  | Q565 & Q655 |
| 192 | DOK2      | TLPPRPDHI   | 54   | 66  | Q565 & Q705 |
| 193 | NCF4      | LLSDEDVELM  | 62   | 68  | Q585 & Q605 |
| 194 | DOK2      | LLASSMSSQL  | 62   | 59  | Q585 & Q655 |
| 195 | NUP210    | IMIHDCLLV   | 60   | 54  | Q605 & Q655 |
| 196 | DOK2      | QLGRISLLL   | 63   | 37  | Q605 & Q705 |
| 197 | CSF3R     | AQDPHSLWV   | 60   | 64  | Q605 & Q800 |
| 198 | ARHGAP15  | FLRAENETGNM | 39   | 64  | Q655 & Q705 |
| 199 | FMNL1     | QLRAAVMLRL  | 65   | 19  | Q655 & Q800 |
| 200 | CSF3R     | AMAQDPHSLWV | N.D. | 103 | Q705 & Q800 |
| 201 | N4BP2L1   | KIYSENLTL   | 94   | 92  | PE & APC    |
| 202 | MPL       | HLWVKNVFL   | 109  | 93  | PE & Q565   |
| 203 | ATP2A3    | KMNVFDTNL   | 89   | 89  | PE & Q585   |
| 204 | BTK       | SLTAISTTL   | 83   | 80  | PE & Q705   |
| 205 | EVI2B     | FLLQMMQVCL  | 86   | 82  | APC & Q565  |

6

7

8

9

10

|     |         |              |      |     |             |
|-----|---------|--------------|------|-----|-------------|
| 206 | SF1     | SLWSSSPVAT   | 69   | 84  | APC & Q585  |
| 207 | IQGAP2  | ILHSRTEFV    | 77   | 86  | APC & Q605  |
| 208 | NCF4    | SLLNLPVWV    | 73   | 92  | APC & Q705  |
| 209 | PIK3CD  | SVSHSSSPMTL  | 76   | 52  | APC & Q800  |
| 210 | N4BP2L1 | TMKLYSENLTLL | 73   | 91  | Q565 & Q605 |
| 211 | ARHGAP4 | PLHCWVVL     | 70   | 77  | Q565 & Q655 |
| 212 | DUSP22  | CLMGDPVPT    | 57   | 86  | Q565 & Q705 |
| 213 | CD79b   | PLDGGVAAA    | 45   | 65  | Q585 & Q605 |
| 214 | BTK     | HLASEKVYAI   | 68   | 65  | Q585 & Q705 |
| 215 | CCL3    | FLTKRGRQV    | 54   | 56  | Q605 & Q655 |
| 216 | PTPN6   | RLGPPVARTRV  | 48   | 68  | Q605 & Q800 |
| 217 | BTK     | SLLTISTTL    | 92   | 84  | Q655 & Q705 |
| 218 | MAP4K1  | IMAIELAEL    | 92   | 93  | Q655 & Q800 |
| 219 | ATP2A3  | KMFVKGAPDSV  | N.D. | 106 | Q705 & Q800 |
| 220 | EVI2B   | FLLQMMQICL   | 91   | 90  | PE & APC    |
| 221 | EVI2B   | QMMQVCLHHL   | 87   | 65  | PE & Q585   |
| 222 | CSF3R   | AMARDPHSL    | 83   | 62  | PE & Q605   |
| 223 | NUP210  | FLAPAKAVVYV  | 88   | 85  | PE & Q705   |
| 224 | BTK     | KLANIQCLCL   | 89   | 51  | PE & Q800   |
| 225 | NUP210  | TIMIHDLCLA   | 85   | 72  | APC & Q565  |
| 226 | IQGAP2  | KIQRNLWTL    | 76   | 69  | APC & Q585  |
| 227 | ITGAM   | VLRQEVAPL    | 89   | 84  | APC & Q605  |
| 228 | NCF4    | LLSDEDVALM   | 76   | 72  | APC & Q655  |
| 229 | EVI2B   | JCLHLLPFWI   | 80   | 79  | APC & Q705  |
| 230 | EVI2B   | VCLHLLPFWI   | 57   | 75  | APC & Q800  |
| 231 | ITGAM   | RVLRQEVAPL   | 74   | 79  | Q565 & Q605 |
| 232 | LRMP    | LQSRGYSSL    | 72   | 70  | Q565 & Q655 |
| 233 | N4BP2L1 | VMALENNYEV   | 60   | 72  | Q565 & Q705 |
| 234 | NUP210  | TLLIGATIQVT  | 69   | 48  | Q585 & Q605 |
| 235 | PRKCB1  | RIGQRQETV    | 63   | 63  | Q585 & Q655 |
| 236 | ARHGAP4 | LLSPLHCWAV   | 77   | 70  | Q585 & Q705 |
| 237 | ZFP36L2 | RLRPLCCTA    | 56   | 58  | Q605 & Q655 |
| 238 | NUP210  | LLIGATIQV    | 59   | 71  | Q605 & Q705 |
| 239 | NUP210  | TLLIGATIQV   | 68   | 81  | Q605 & Q800 |
| 240 | MPL     | HLWVKNMFL    | 104  | 82  | PE & APC    |
| 241 | DOK2    | TLLASSMSSQL  | 74   | 80  | PE & Q585   |
| 242 | NCF4    | RLSDEDVALM   | 77   | 68  | PE & Q655   |
| 243 | CD79b   | TLRTGEVKWSV  | 69   | 62  | PE & Q800   |
| 244 | ITGB2   | RLGGAAALPRV  | 73   | 95  | APC & Q565  |
| 245 | BTK     | LASEKVYTI    | 62   | 67  | APC & Q585  |
| 246 | ATP2A3  | RLWTTTRPRV   | 68   | 68  | APC & Q655  |
| 247 | MAP4K1  | GMAIELAEL    | 81   | 81  | APC & Q705  |
| 248 | NUP210  | LLIGATIQVT   | 71   | 46  | APC & Q800  |
| 249 | SEPT6   | RLSCSSPRA    | 58   | 56  | Q565 & Q605 |
| 250 | IQGAP2  | ILHSRTEFISV  | 66   | 70  | Q565 & Q655 |
| 251 | NUP210  | LAPAKAVVYV   | 67   | 72  | Q565 & Q705 |
| 252 | LTB     | DLSPLGPA     | 62   | 61  | Q585 & Q655 |
| 253 | IQGAP2  | KIQRNLRTL    | 66   | 39  | Q585 & Q705 |
| 254 | PIK3CD  | KTGECCLYM    | 84   | 86  | Q605 & Q655 |
| 255 | NUP210  | TLLIGATMQV   | 87   | 83  | Q605 & Q705 |
| 256 | FMNL1   | SLWQLRAAV    | 86   | 91  | Q605 & Q800 |
| 257 | N4BP2L1 | KLYSENKLL    | 93   | 90  | Q655 & Q705 |
| 258 | NCF4    | SLLSLPVWV    | 80   | 87  | Q655 & Q800 |
| 259 | CORO1A  | KLQATVQEL    | 89   | 81  | PE & APC    |
| 260 | SF1     | SLWSSSPVA    | 86   | 102 | PE & Q565   |
| 261 | SF1     | SLWSSSPMATT  | 75   | 83  | PE & Q585   |
| 262 | EVI2B   | MMQICLHHL    | 97   | 74  | PE & Q605   |
| 263 | EVI2B   | LLQMMQICL    | 87   | 87  | PE & Q655   |
| 264 | N4BP2L1 | KIYSENKLL    | 83   | 81  | PE & Q705   |
| 265 | NUP210  | CLFPPAPAKA   | 20   | 23  | APC & Q565  |
| 266 | NCF4    | RLSDEDVEL    | 85   | 93  | APC & Q585  |
| 267 | SYNGR1  | SIFTWAGKAVL  | 81   | 46  | APC & Q655  |
| 268 | ITGAM   | RVLRQEVAPL   | 66   | 79  | APC & Q705  |
| 269 | CORO1A  | GLWRHSPCA    | 114  | 62  | Q565 & Q605 |
| 270 | LRMP    | SLLQSRGYSSL  | 69   | 72  | Q565 & Q655 |
| 271 | LTB     | GLREREDLL    | 65   | 48  | Q565 & Q705 |
| 272 | NCF4    | QLQGLQHNA    | 53   | 51  | Q585 & Q605 |
| 273 | HSPA6   | FMTSSWVGA    | 65   | 67  | Q585 & Q655 |
| 274 | N4BP2L1 | AVMALENNYEV  | 64   | 85  | Q605 & Q655 |
| 275 | NUP210  | VTLLIGATIQV  | 63   | 78  | Q605 & Q705 |
| 276 | CD79b   | LLSAEVQQHL   | 65   | 34  | Q655 & Q800 |
| 277 | CD48    | KQDNSTYIMRV  | N.D. | 124 | Q705 & Q800 |
| 278 | DOK2    | SMSSQLGRISL  | 86   | 76  | PE & APC    |
| 279 | NCF4    | LLSDEDVEL    | 85   | 92  | PE & Q585   |
| 280 | NUP210  | IMIHDLCVFL   | 81   | 64  | PE & Q605   |
| 281 | NUP210  | LLIGATMQVT   | 74   | 53  | PE & Q655   |
| 282 | SF1     | SLWSSSPVATT  | 70   | 81  | PE & Q705   |
| 283 | LTB     | GLCEREDLL    | 75   | 72  | PE & Q800   |
| 284 | PSD4    | AQAEHSITRV   | 78   | 61  | APC & Q605  |
| 285 | CCL3    | FLTKRGGQV    | 64   | 75  | APC & Q705  |
| 286 | NUP210  | CLVFLAPAKA   | 50   | 67  | Q565 & Q655 |
| 287 | SF1     | SLWSSSPMAT   | 88   | 100 | Q585 & Q605 |
| 288 | N4BP2L1 | KIYSENLTLL   | 91   | 94  | Q585 & Q655 |
| 289 | ARHGAP4 | SLLSPLHCWA   | 86   | 81  | Q605 & Q655 |
| 290 | NCF4    | RLSDEDVAL    | 85   | 71  | Q605 & Q705 |
| 291 | EVI2B   | GLPPPPPLL    | 80   | 85  | Q605 & Q800 |
| 292 | NUP210  | CLVFLAPAKA   | 72   | 69  | Q655 & Q705 |
| 293 | NCF4    | SLLNLPVWVLM  | 85   | 66  | Q655 & Q800 |
| 294 | MCM5    | YLCDKVVPG    | 97   | 88  | PE & APC    |
| 295 | NUP210  | VTLLIGATMQV  | 88   | 84  | PE & Q565   |
| 296 | ARHGAP4 | SLLSPLHCWA   | 50   | 65  | PE & Q585   |
| 297 | NCF4    | LLSDEDVELM   | 83   | 69  | PE & Q605   |
| 298 | EVI2B   | QMMQICLHHL   | 82   | 59  | PE & Q655   |
| 299 | SYNGR1  | SIFTWAGQAVL  | 84   | 58  | PE & Q705   |
| 300 | FMNL1   | SLWQLRAAVML  | 58   | 48  | APC & Q565  |
| 301 | NUP210  | FLAPAKAVV    | 85   | 83  | APC & Q585  |
| 302 | CD79b   | RTGEVKWSV    | 67   | 79  | APC & Q605  |
| 303 | BTK     | LASEKVYAI    | 72   | 69  | APC & Q655  |
| 304 | CSF3R   | AMARDPHSL    | 72   | 53  | APC & Q800  |
| 305 | NCF4    | LLNLPVWVL    | 38   | 65  | Q565 & Q605 |
| 306 | FMNL1   | RMTRWAQTM    | 79   | 38  | Q565 & Q655 |
| 307 | CCL3    | FLTKRSGQV    | 69   | 77  | Q565 & Q705 |
| 308 | PRKCB1  | SMSKEAVAI    | 68   | 65  | Q585 & Q605 |
| 309 | HSPA6   | SMCRFSPLTL   | 61   | 69  | Q585 & Q655 |
| 310 | IQGAP2  | NLWTFLEQTGHV | 60   | 82  | Q585 & Q705 |

11

12

13

14

15

|     |          |                       |      |     |             |
|-----|----------|-----------------------|------|-----|-------------|
| 311 | HSPA6    | K C Q E V L A W L     | 82   | 30  | Q605 & Q705 |
| 312 | NUP210   | T L L I G A T M Q V T | 45   | 41  | Q605 & Q800 |
| 313 | PTPN6    | T L S S R V C C R T   | 72   | 34  | Q655 & Q705 |
| 314 | NUP210   | L V F L A P A K A V V | 53   | 67  | Q655 & Q800 |
| 315 | NCF4     | L L S D E D V A L M V | 70   | 82  | PE & APC    |
| 316 | N4BP2L1  | A L E N N Y E V L     | 71   | 63  | PE & Q565   |
| 317 | EVI2B    | C L H H L P F W I     | 41   | 33  | PE & Q585   |
| 318 | PTPN6    | S T V A S W L G P V   | 75   | 64  | PE & Q605   |
| 319 | CCL3     | F L T K R S R Q V     | 64   | 76  | PE & Q655   |
| 320 | ARHGAP4  | P L H C W A V L L     | 69   | 77  | PE & Q800   |
| 321 | PTPN6    | T V A S R L G P V     | 73   | 61  | APC & Q565  |
| 322 | CCL3     | F L T K R S G Q V C A | 61   | 59  | APC & Q605  |
| 323 | SP110    | L L E A P T G L V     | 75   | 69  | APC & Q655  |
| 324 | NCF4     | V S L L S L P V W V   | 56   | 60  | APC & Q800  |
| 325 | ARHGAP15 | K L G D C I W T Y P S | N.D. | 105 | Q565 & Q655 |
| 326 | NUP210   | M I H D L C L A F P A | N.D. | 128 | Q565 & Q705 |
| 327 | PSD4     | N L P D K M F L P G A | N.D. | 124 | Q585 & Q605 |
| 328 | ARHGAP15 | K L G D C I W T Y L S | N.D. | 91  | Q585 & Q655 |
| 329 | HSPA6    | G V F I Q V Y E V     | N.D. | 103 | Q585 & Q705 |
| 330 | LYN      | L M F W S P S H S C A | N.D. | 102 | Q605 & Q705 |
| 331 | MCM5     | T L T N I A M R P G L | N.D. | 74  | Q605 & Q800 |
| 332 | RASGRP2  | Q V L D L R L P S G V | N.D. | 107 | Q655 & Q705 |
| 333 | NUP210   | A T A T P C W T W L L | N.D. | 86  | Q655 & Q800 |

16

<sup>a</sup> Peptide sequences are provided with polymorphic residue in red

<sup>b</sup> RS are normalized to the HLA-A2 high affinity CMV-pp65<sub>NLV</sub> peptide
