# Supplementary material for: High-Throughput Identification of Potential Minor Histocompatibility Antigens by MHC Tetramer-Based Screening: Feasibility and Limitations
Source: PubMed Central journal article supplement (PMC3151248; doi:10.1371/journal.pone.0022523), 2011-08-05
Supplement: pone.0022523.s006.pdf [file pone.0022523.s006.pdf]

Supplementary Table IV.

| Allo-SCT patient                 | pMHC tetramer group | Dual-color encoding | CD8+ T cell frequency | Peptide number | Allo-SCT patient    | pMHC tetramer group | Dual-color encoding | CD8+ T cell frequency | Peptide number |
|----------------------------------|---------------------|---------------------|-----------------------|----------------|---------------------|---------------------|---------------------|-----------------------|----------------|
| APM4461<br>12 weeks <sup>a</sup> | 1                   | QD655 & PE          | 0,36                  | 4              | OBB1465<br>12 weeks | 1                   | APC & QD565         | 0,09                  | 7              |
|                                  | 2                   | QD585 & QD605       | 0,31                  | 37             |                     | 2                   | PE & QD655          | 0,07                  | 4              |
|                                  |                     | QD605 & PE          | 0,04                  | 25             |                     |                     | QD585 & QD705       | 0,21                  | 39             |
|                                  | 3                   | APC & PE            | 0,15                  | 46             |                     |                     | PE & QD565          | 0,03                  | 23             |
|                                  | 4                   | APC & PE            | 0,06                  | 68             |                     | 4                   | PE & QD605          | 0,27                  | 71             |
|                                  | 5                   | PE & QD585          | 0,04                  | 91             |                     |                     | QD705 & QD585       | 0,04                  | 84             |
|                                  |                     | PE & QD605          | n.t.                  | 92             |                     | 5                   | PE & QD655          | 0,17                  | 93             |
|                                  |                     | QD585 & QD655       | 0,18                  | 104            |                     |                     | QD585 & QD655       | 0,55                  | 104            |
|                                  | 6                   | PE & QD605          | 0,42                  | 115            |                     | 6                   | PE & QD800          | 0,25                  | 118            |
|                                  | 7                   | PE & APC            | 4,9                   | 135            |                     |                     | QD585 & QD705       | 0,04                  | 128            |
|                                  | 9                   | APC & QD565         | 0,04                  | 185            |                     | 8                   | PE & QD705          | 0,07                  | 163            |
|                                  | 11                  | QD585 & QD655       | 0,77                  | 235            |                     | 9                   | PE & QD800          | 0,35                  | 184            |
|                                  | 12                  | QD565 & APC         | 0,19                  | 265            |                     | 9                   | QD605 & QD655       | 0,15                  | 195            |
|                                  | 15                  | QD585 & QD655       | 0,6                   | 309            |                     | 11                  | QD605 & QD705       | 0,05                  | 238            |
|                                  | BDY3356<br>16 weeks | 2                   | APC & PE              | 0,07           |                     | 22                  | 12                  | APC & QD565           | 0,04           |
|                                  |                     | QD605 & QD585       | 0,177                 | 37             |                     | QD705 & QD605       | 0,06                | 255                   |                |
| 4                                |                     | APC & PE            | 0,05                  | 68             | 14                  | QD605 & QD800       | 0,06                | 291                   |                |
| 5                                |                     | QD655 & QD585       | 0,215                 | 104            |                     | QD655 & QD705       | 0,07                | 292                   |                |
|                                  |                     | APC & PE            | 0,11                  | 89             | JMO2750<br>18 weeks | 1                   | QD585 & PE          | 0,27                  | 2              |
|                                  |                     | QD705 & QD655       | 0,17                  | 109            |                     |                     | QD705 & PE          | 0,02                  | 5              |
| 6                                |                     | QD655 & QD800       | 0,27                  | 133            |                     | 4                   | QD585 & QD705       | 0,19                  | 84             |
| 7                                |                     | QD655 & QD705       | 0,53                  | 156            |                     |                     | APC & PE            | 0,2                   | 68             |
| 9                                |                     | APC & QD565         | 0,03                  | 185            |                     | 5                   | QD585 & QD655       | 0,2                   | 104            |
| 10                               |                     | PE & QD585          | 0,05                  | 203            |                     |                     | QD655 & QD705       | 0,14                  | 109            |
|                                  |                     | QD705 & APC         | 0,05                  | 208            |                     | 6                   | QD585 & QD705       | 0,62                  | 128            |
|                                  | QD655 & QD800       | 0,2                 | 218                   | 7              |                     | QD605 & QD655       | 0,52                | 153                   |                |
| 11                               | QD705 & APC         | 0,04                | 229                   |                |                     | QD585 & QD605       | 0,15                | 150                   |                |
| LBK5266<br>16 weeks              | 2                   | PE & QD605          | 0,04                  | 25             |                     |                     | APC & PE            | 0,08                  | 135            |
|                                  | 4                   | APC & PE            | 0,05                  | 68             |                     | 8                   | QD705 & PE          | 0,07                  | 163            |
|                                  | 8                   | PE & QD705          | 0,08                  | 163            | 9                   | QD705 & APC         | 0,06                | 188                   |                |
|                                  | 10                  | QD585 & QD605       | 0,19                  | 213            |                     | QD565 & APC         | 0,07                | 185                   |                |
| JVE3357<br>28 weeks              | 8                   | PE & QD705          | 0,08                  | 163            | 11                  | QD585 & QD655       | 0,24                | 235                   |                |
|                                  | 11                  | QD705 & APC         | 0,06                  | 229            | 13                  | QD565 & APC         | 0,08                | 265                   |                |
|                                  | 12                  | QD605 & QD655       | 0,13                  | 254            | 14                  | QD655 & QD705       | 0,34                | 292                   |                |
|                                  | 14                  | PE & QD655          | 0,15                  | 281            | MBF5177<br>12 weeks | 2                   | QD605 & PE          | 0,04                  | 25             |
|                                  |                     |                     |                       | 8              |                     | PE & QD705          | 0,1                 | 163                   |                |

<sup>a</sup> Allo-SCT patient PBMC samples were obtained at the indicated time point after DLI
